# Supplementary material for: Exploring divalent conjugates of 5-N-acetyl-neuraminic acid as inhibitors of coxsackievirus A24 variant (CVA24v) transduction
Source: Royal Society of Chemistry journal article supplement (doi:10.1039/d1ra08968d), 2022-01-01

Supplementary Information for:

**Exploring divalent conjugates of 5-*N*-acetyl-neuraminic acid as inhibitors of coxsackievirus  
A24 variant (CVA24v) transduction**

Emil Johansson, Rémi Caraballo, Georg Zocher, Nitesh Mistry, Niklas Arnberg, Thilo Stehle, and Mikael Elofsson\*

\*Professor Mikael Elofsson

Email: [mikael.elofsson@umu.se](mailto:mikael.elofsson@umu.se)

**This PDF file includes:**

<sup>1</sup>H-NMR and <sup>13</sup>C-NMR spectra for compounds **3**, **10–21**, **25–34**, and **38–41**.

# Compound 3

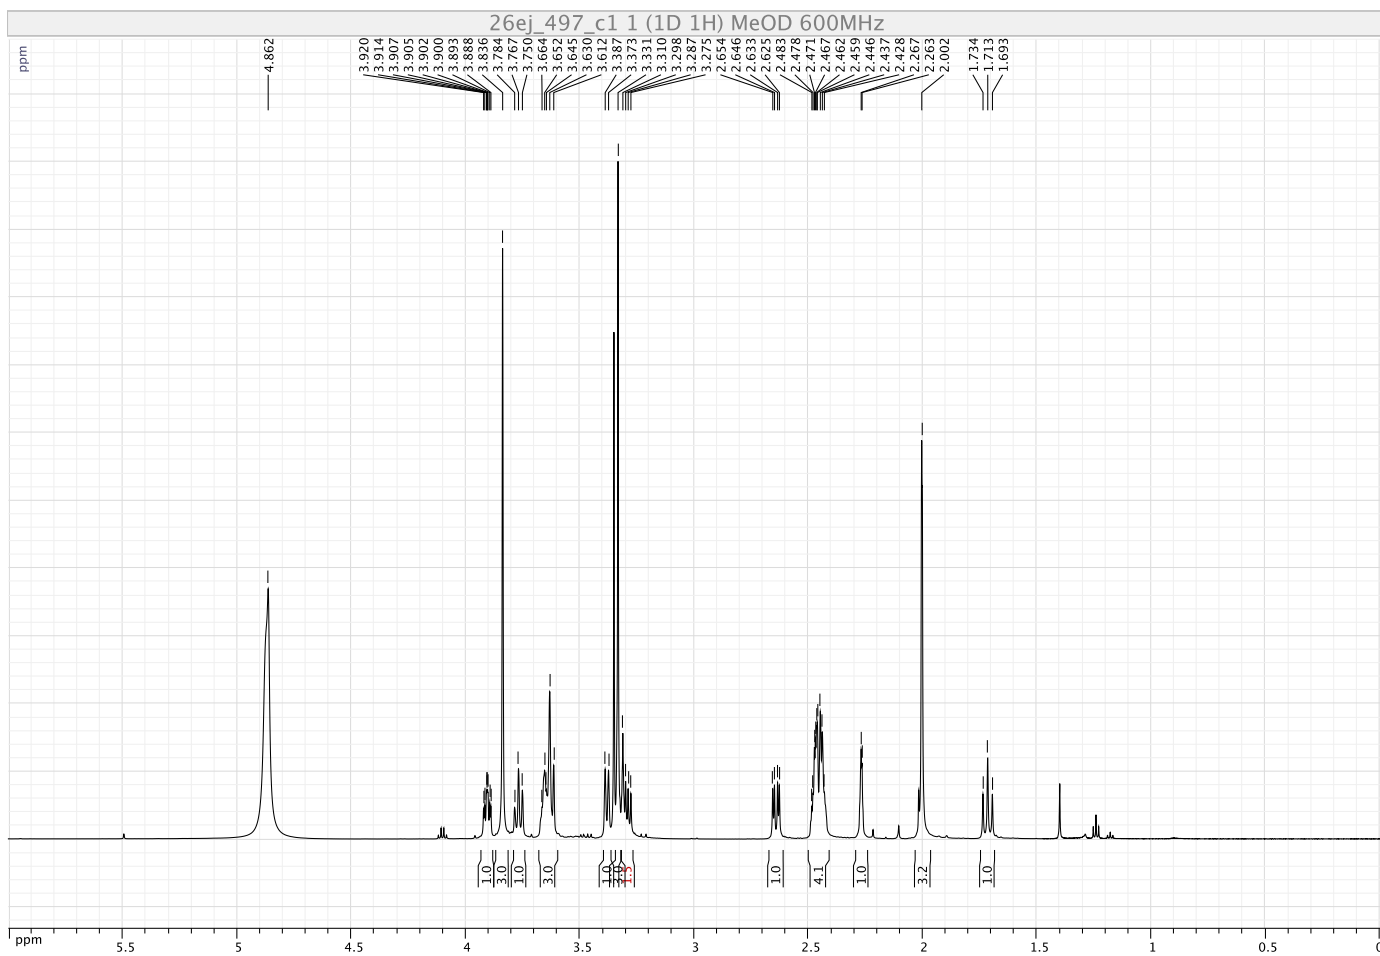

# Compound 3

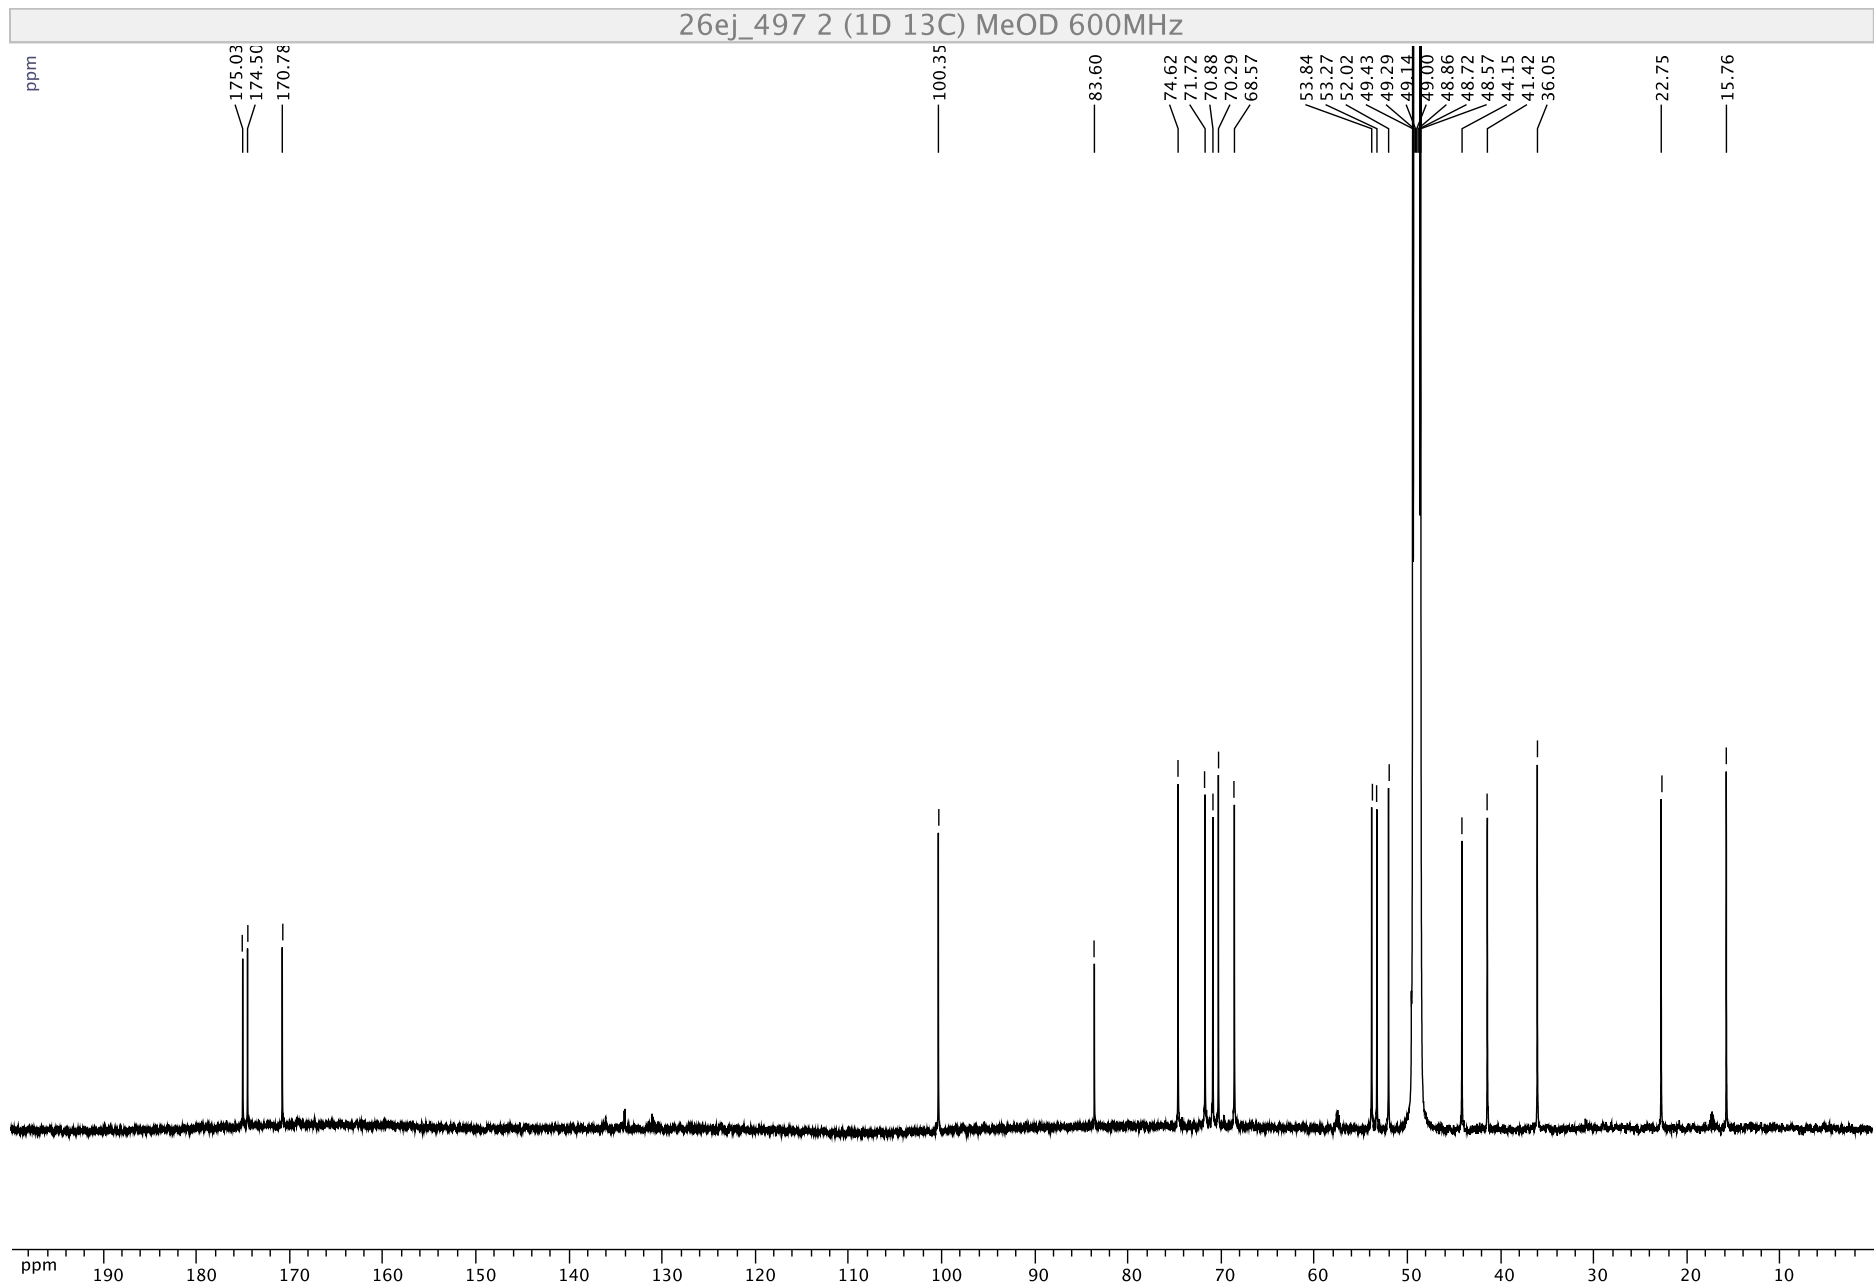

# Compound 10

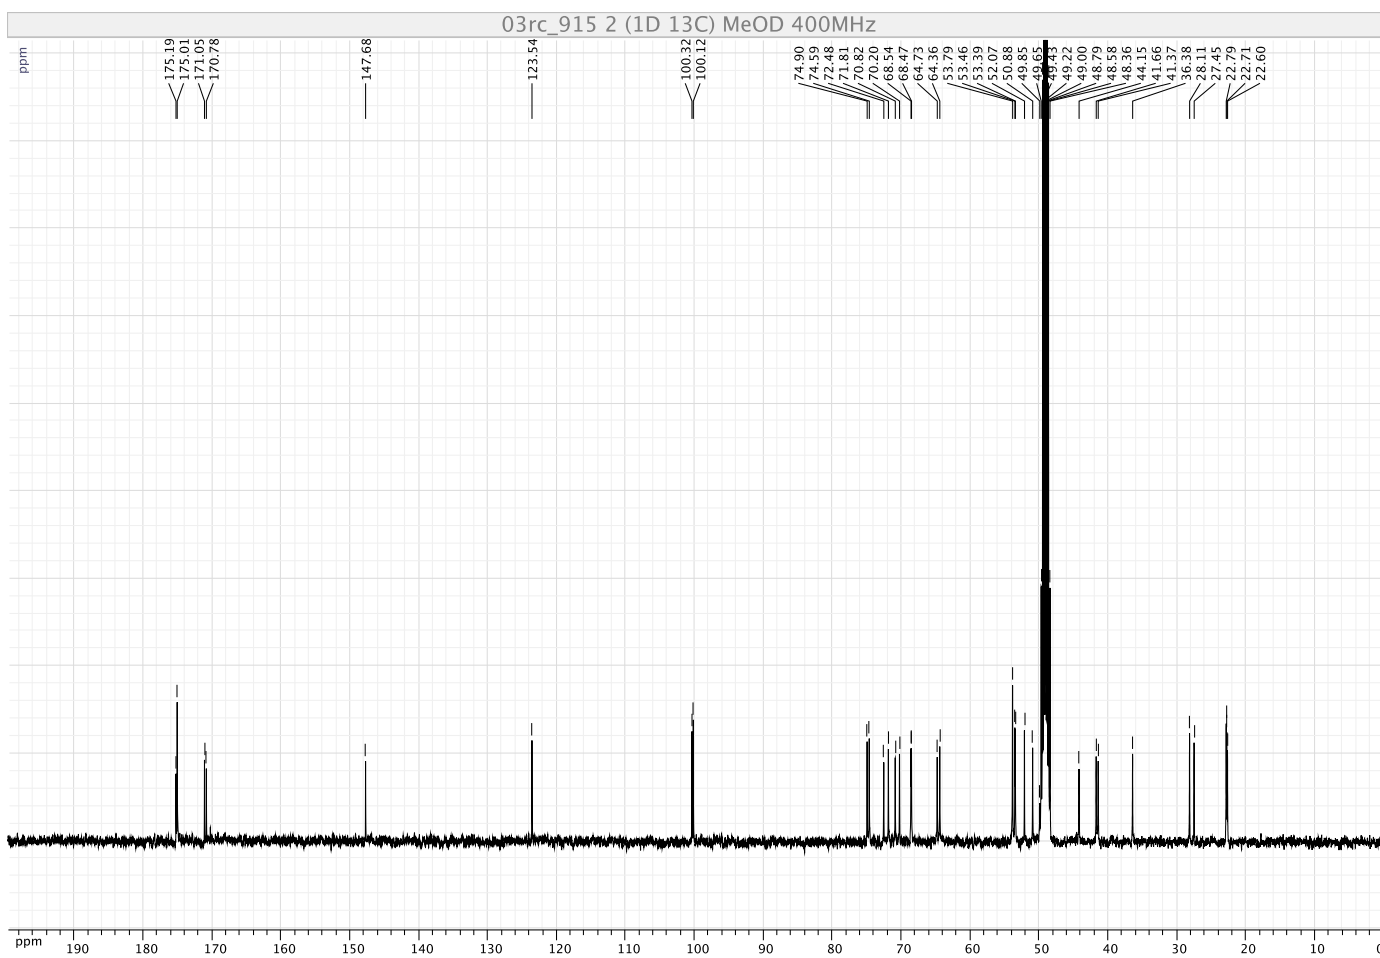



# Compound 10

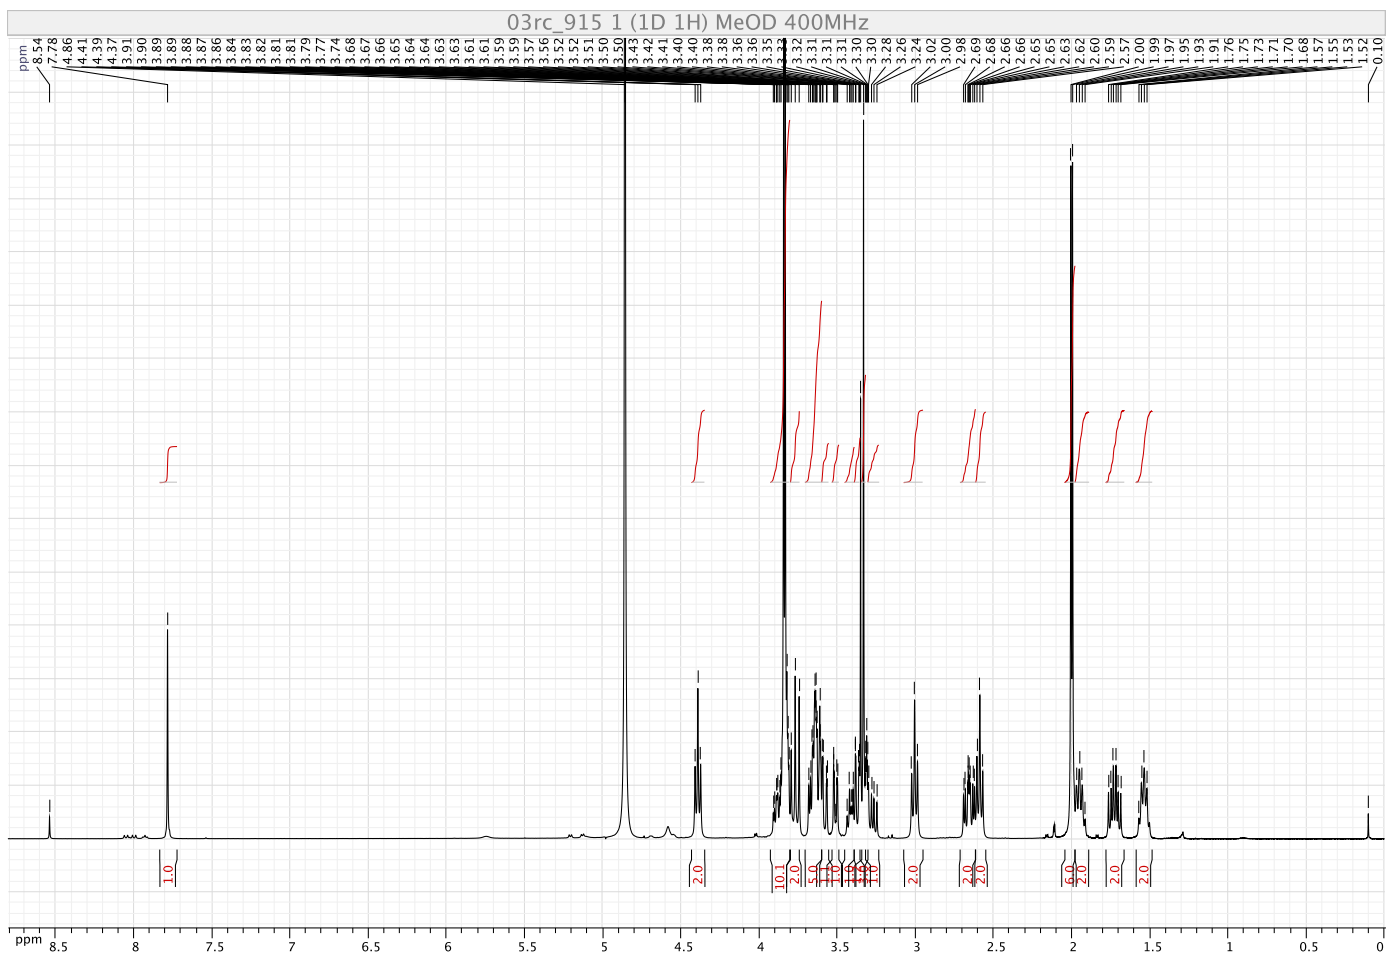

# Compound 11

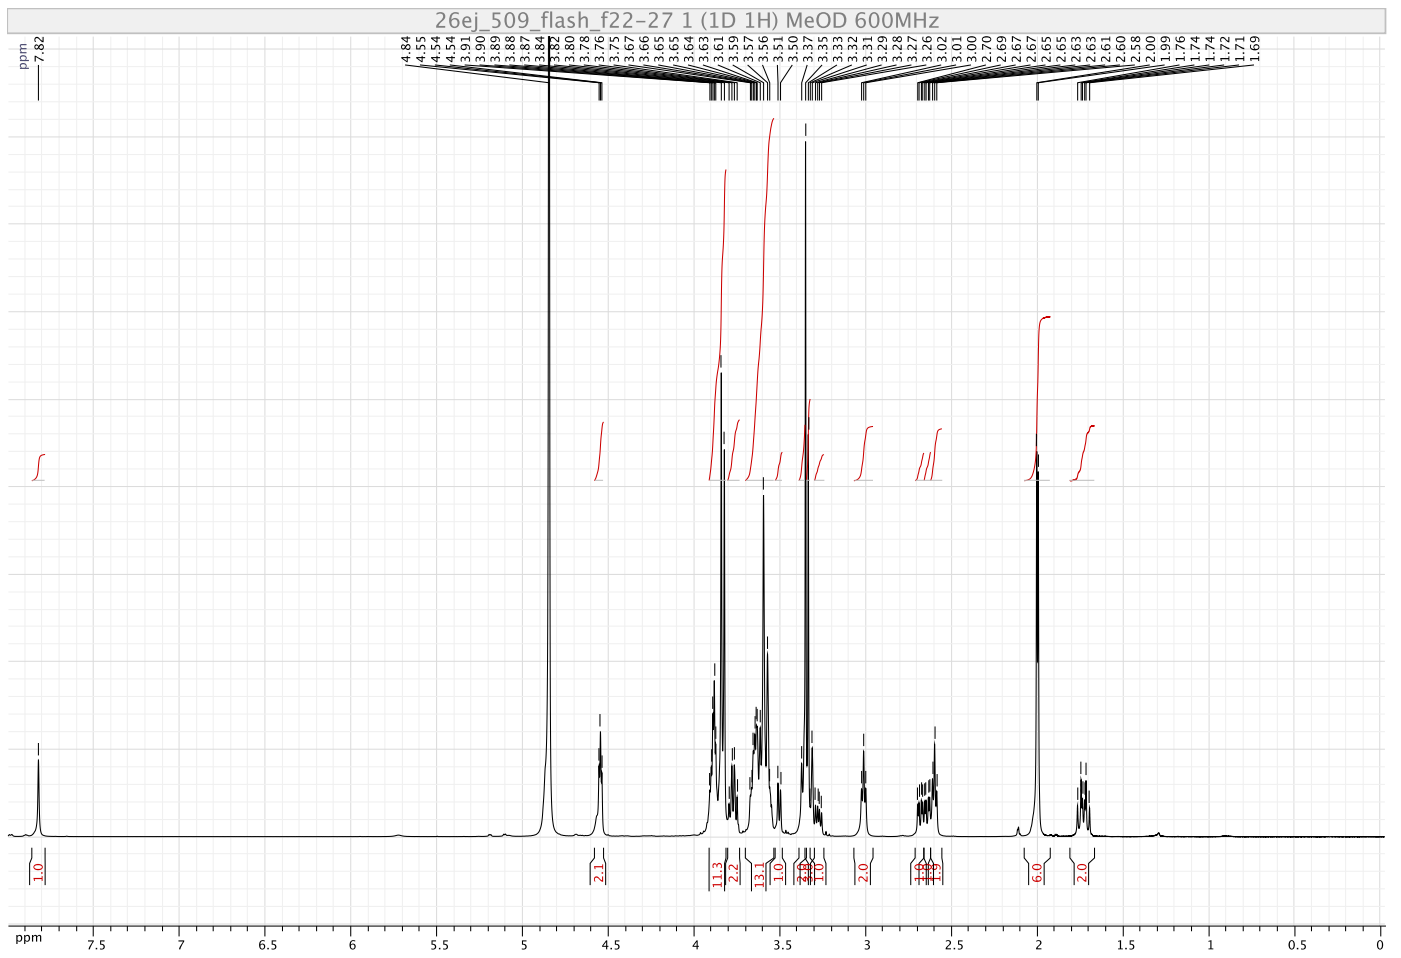

# Compound 11

26ej\_509\_flash\_f22-27 2 (1D 13C) MeOD 600MHz

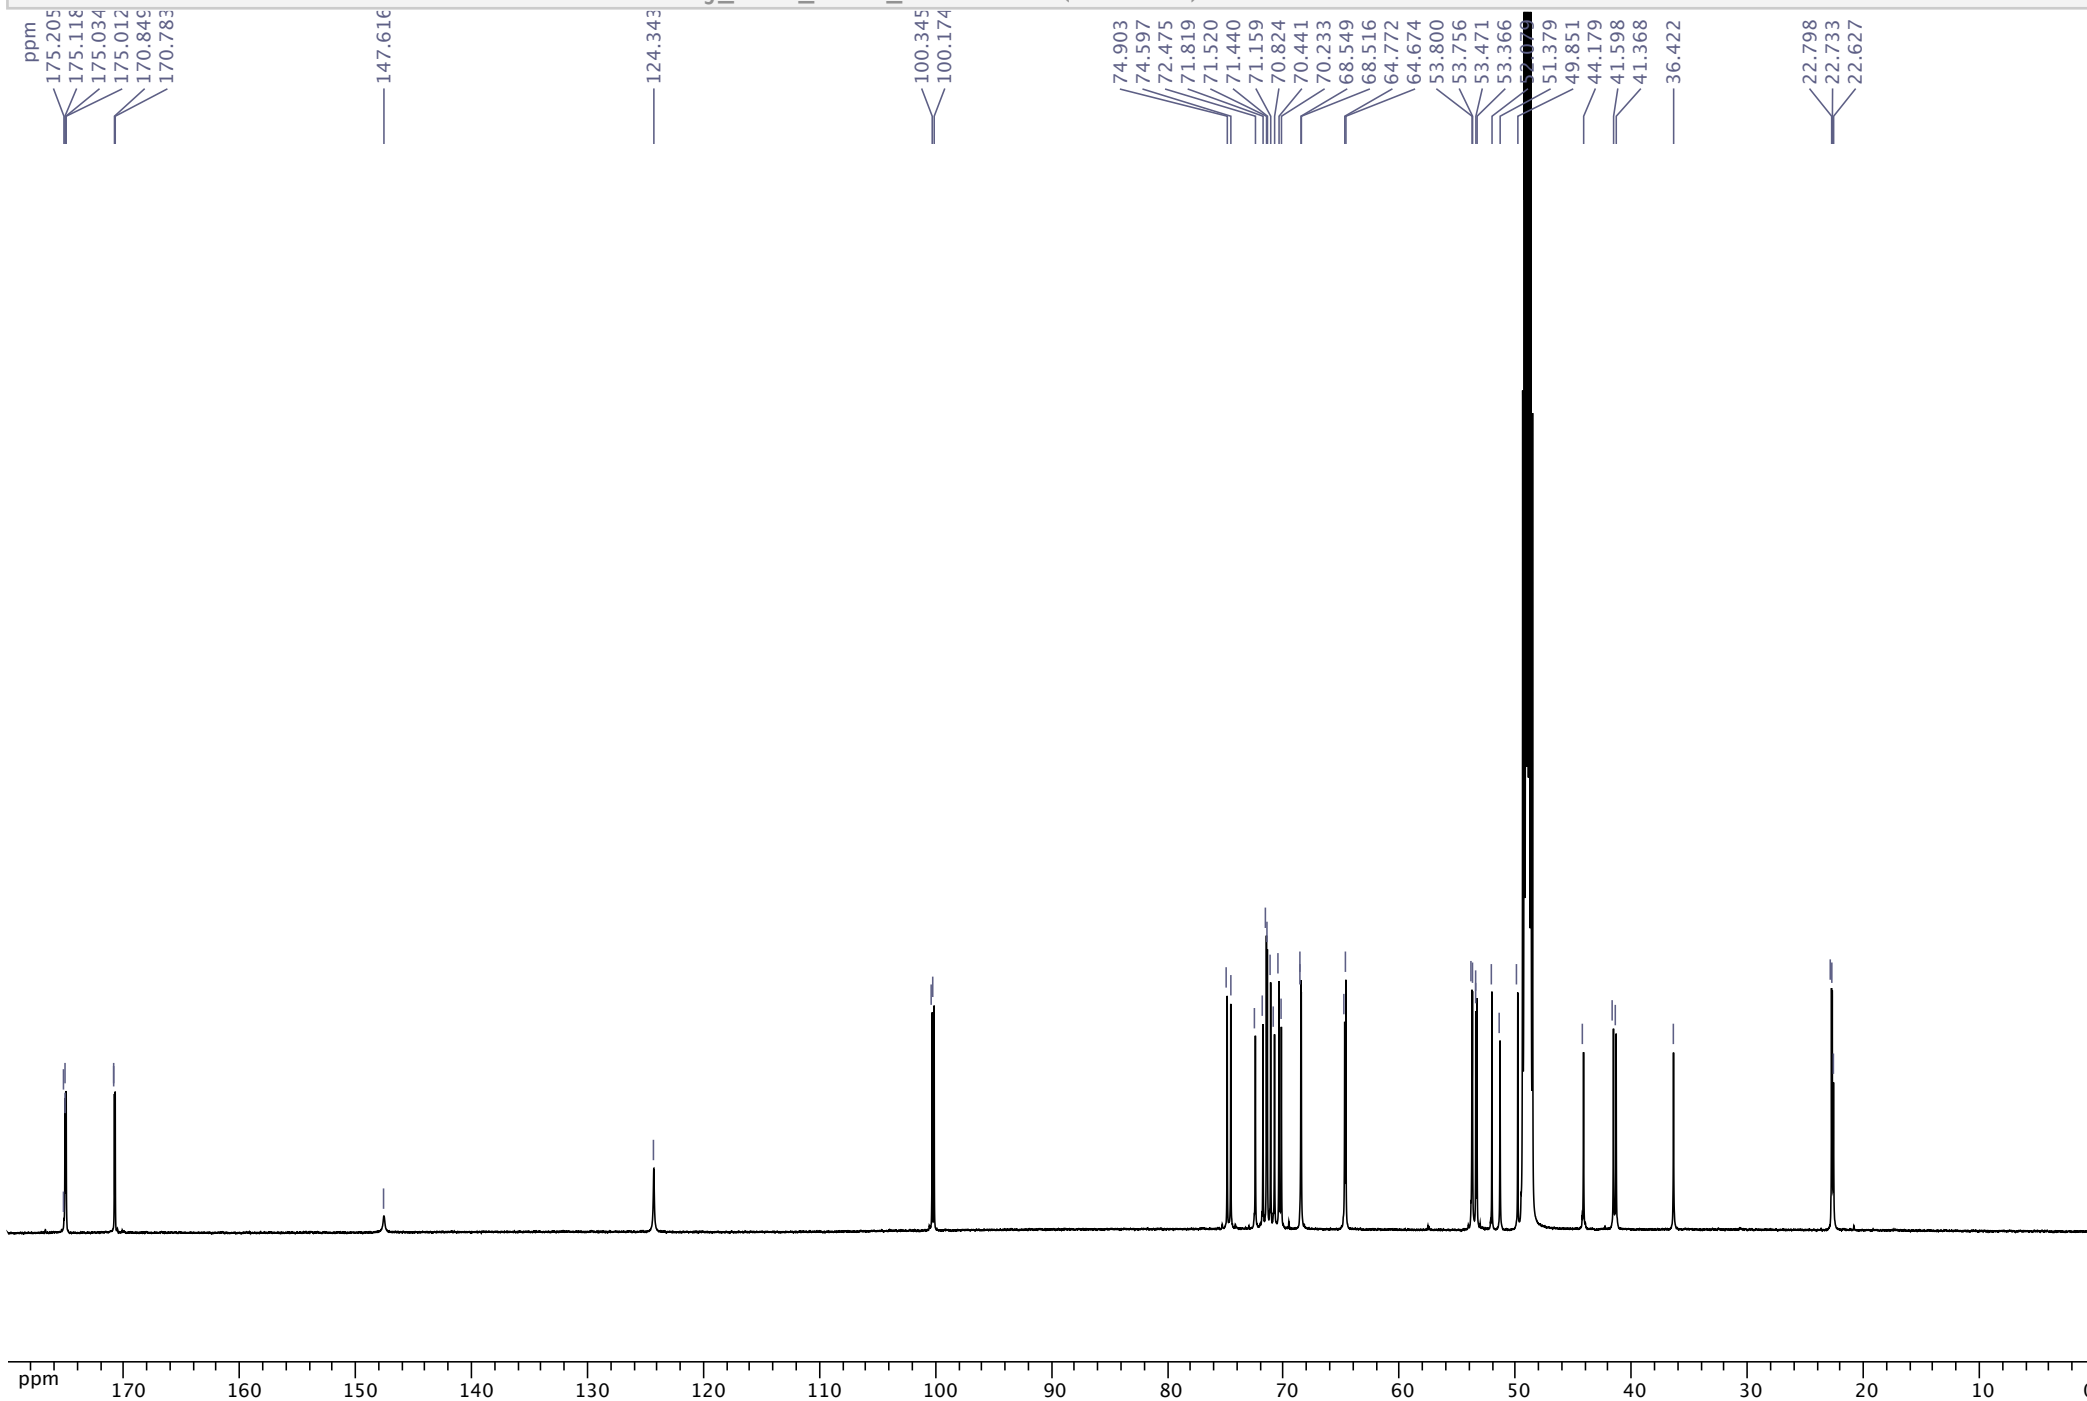

Compound 12

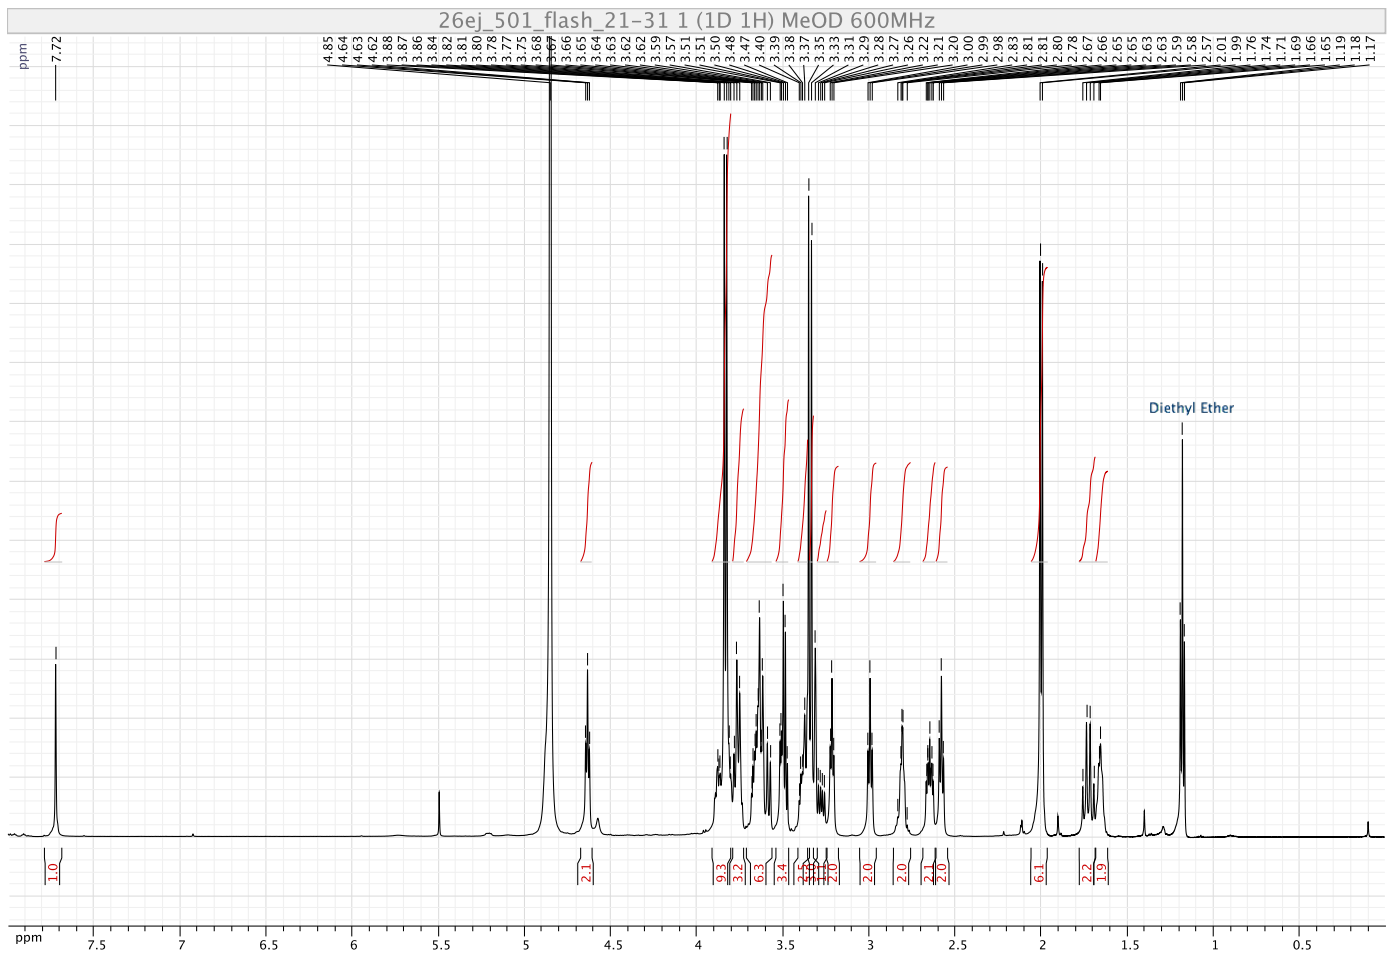

# Compound 12

26ej\_501\_flash\_f21-31CNMR 2 (1D 13C) MeOD 600MHz

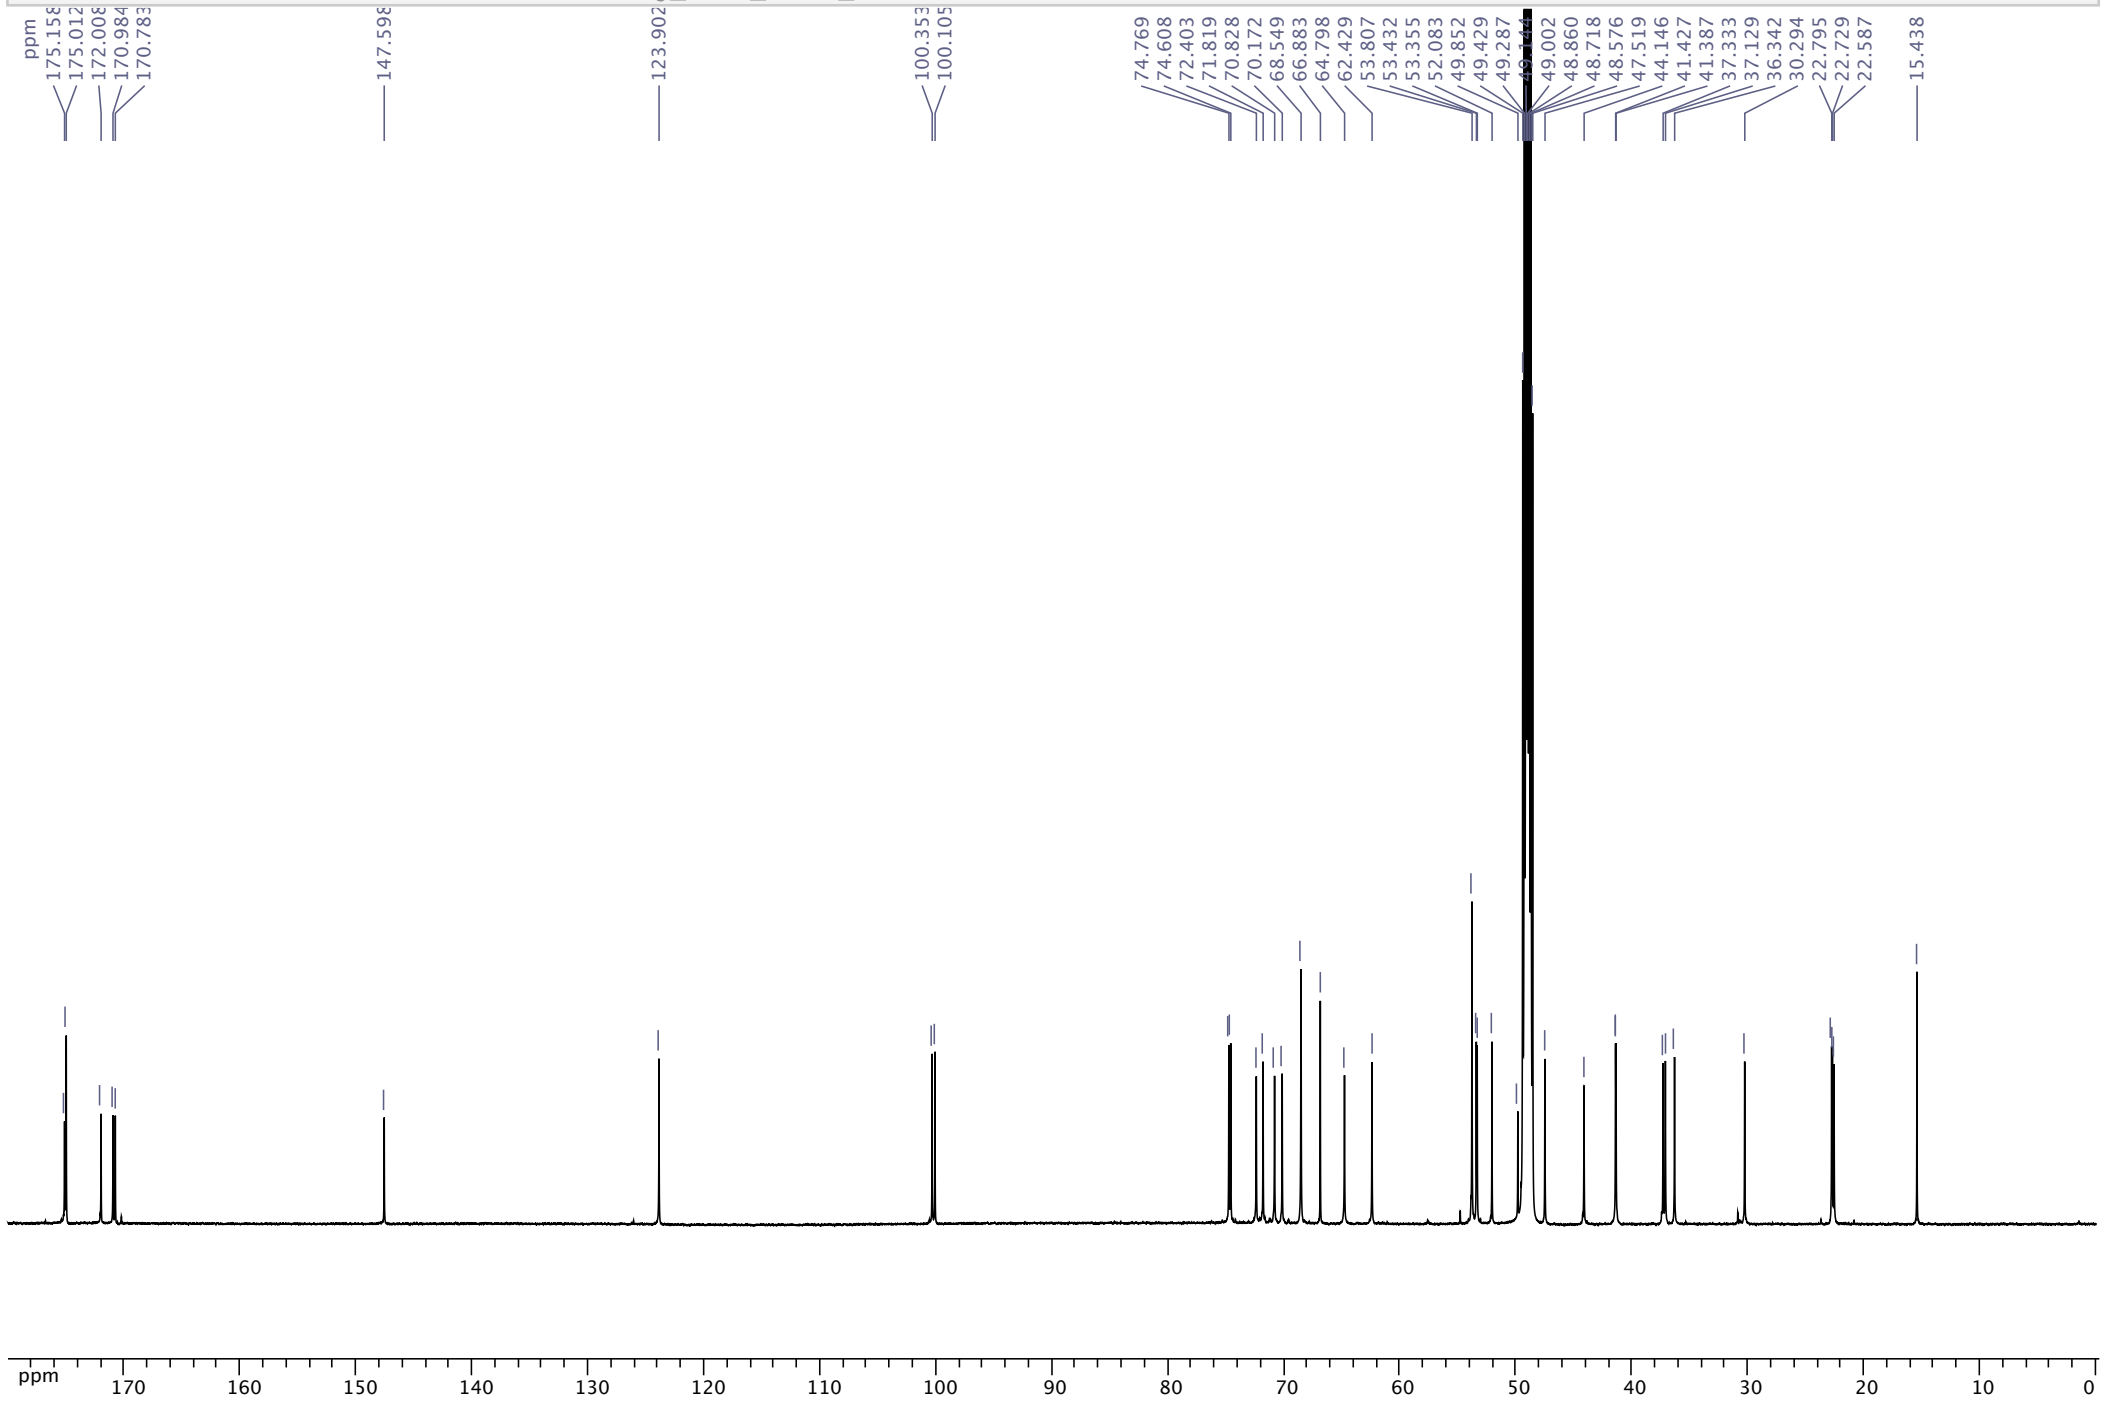

# Compound 13

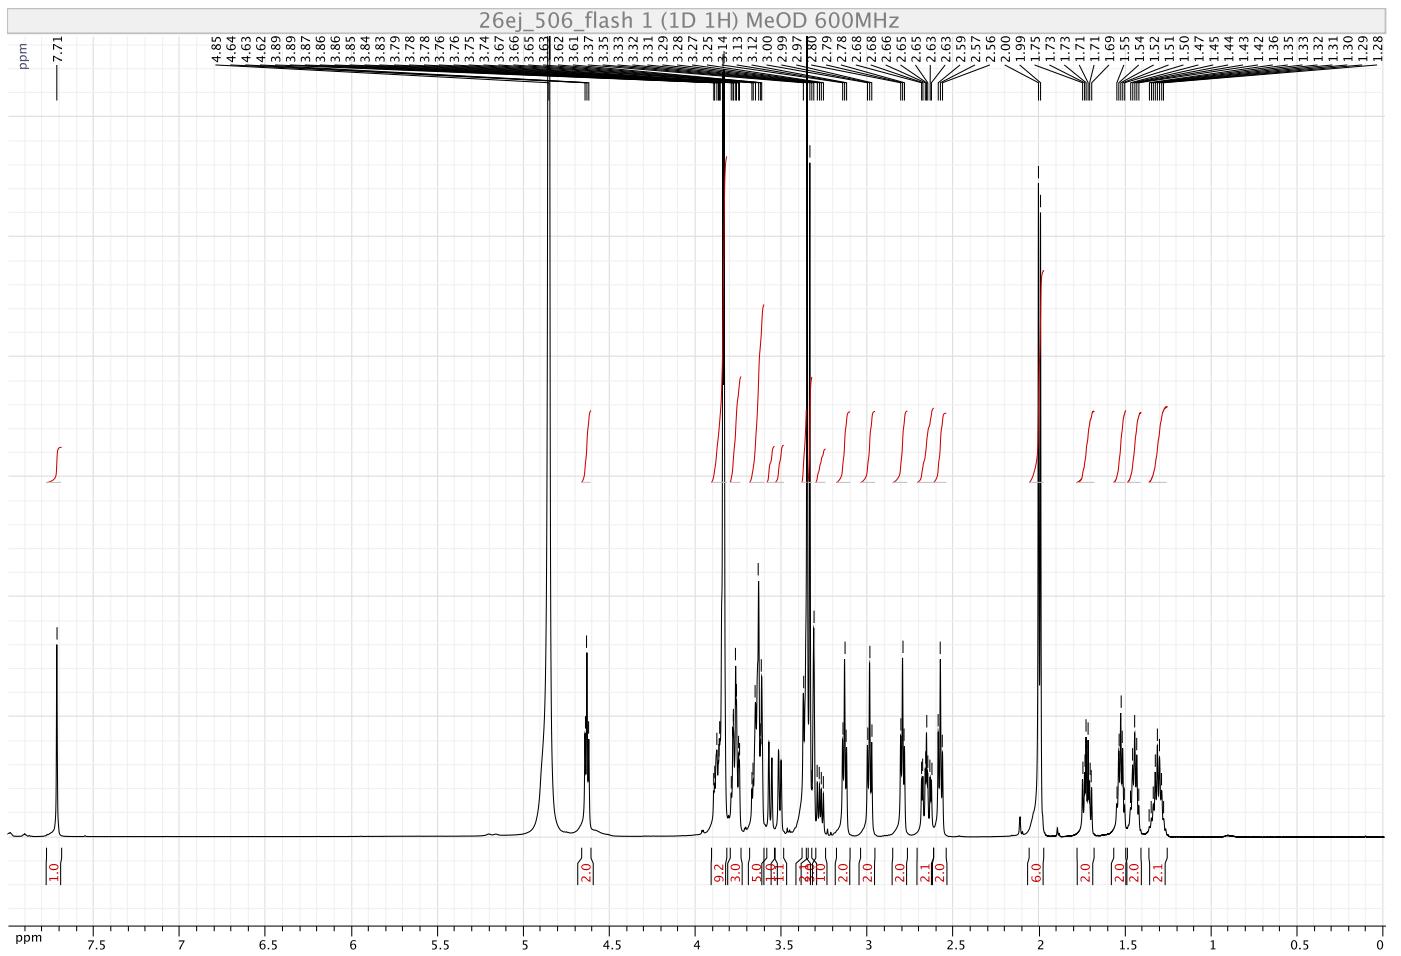

# Compound 13

26ej\_506\_flash 2 (1D 13C) MeOD 600MHz

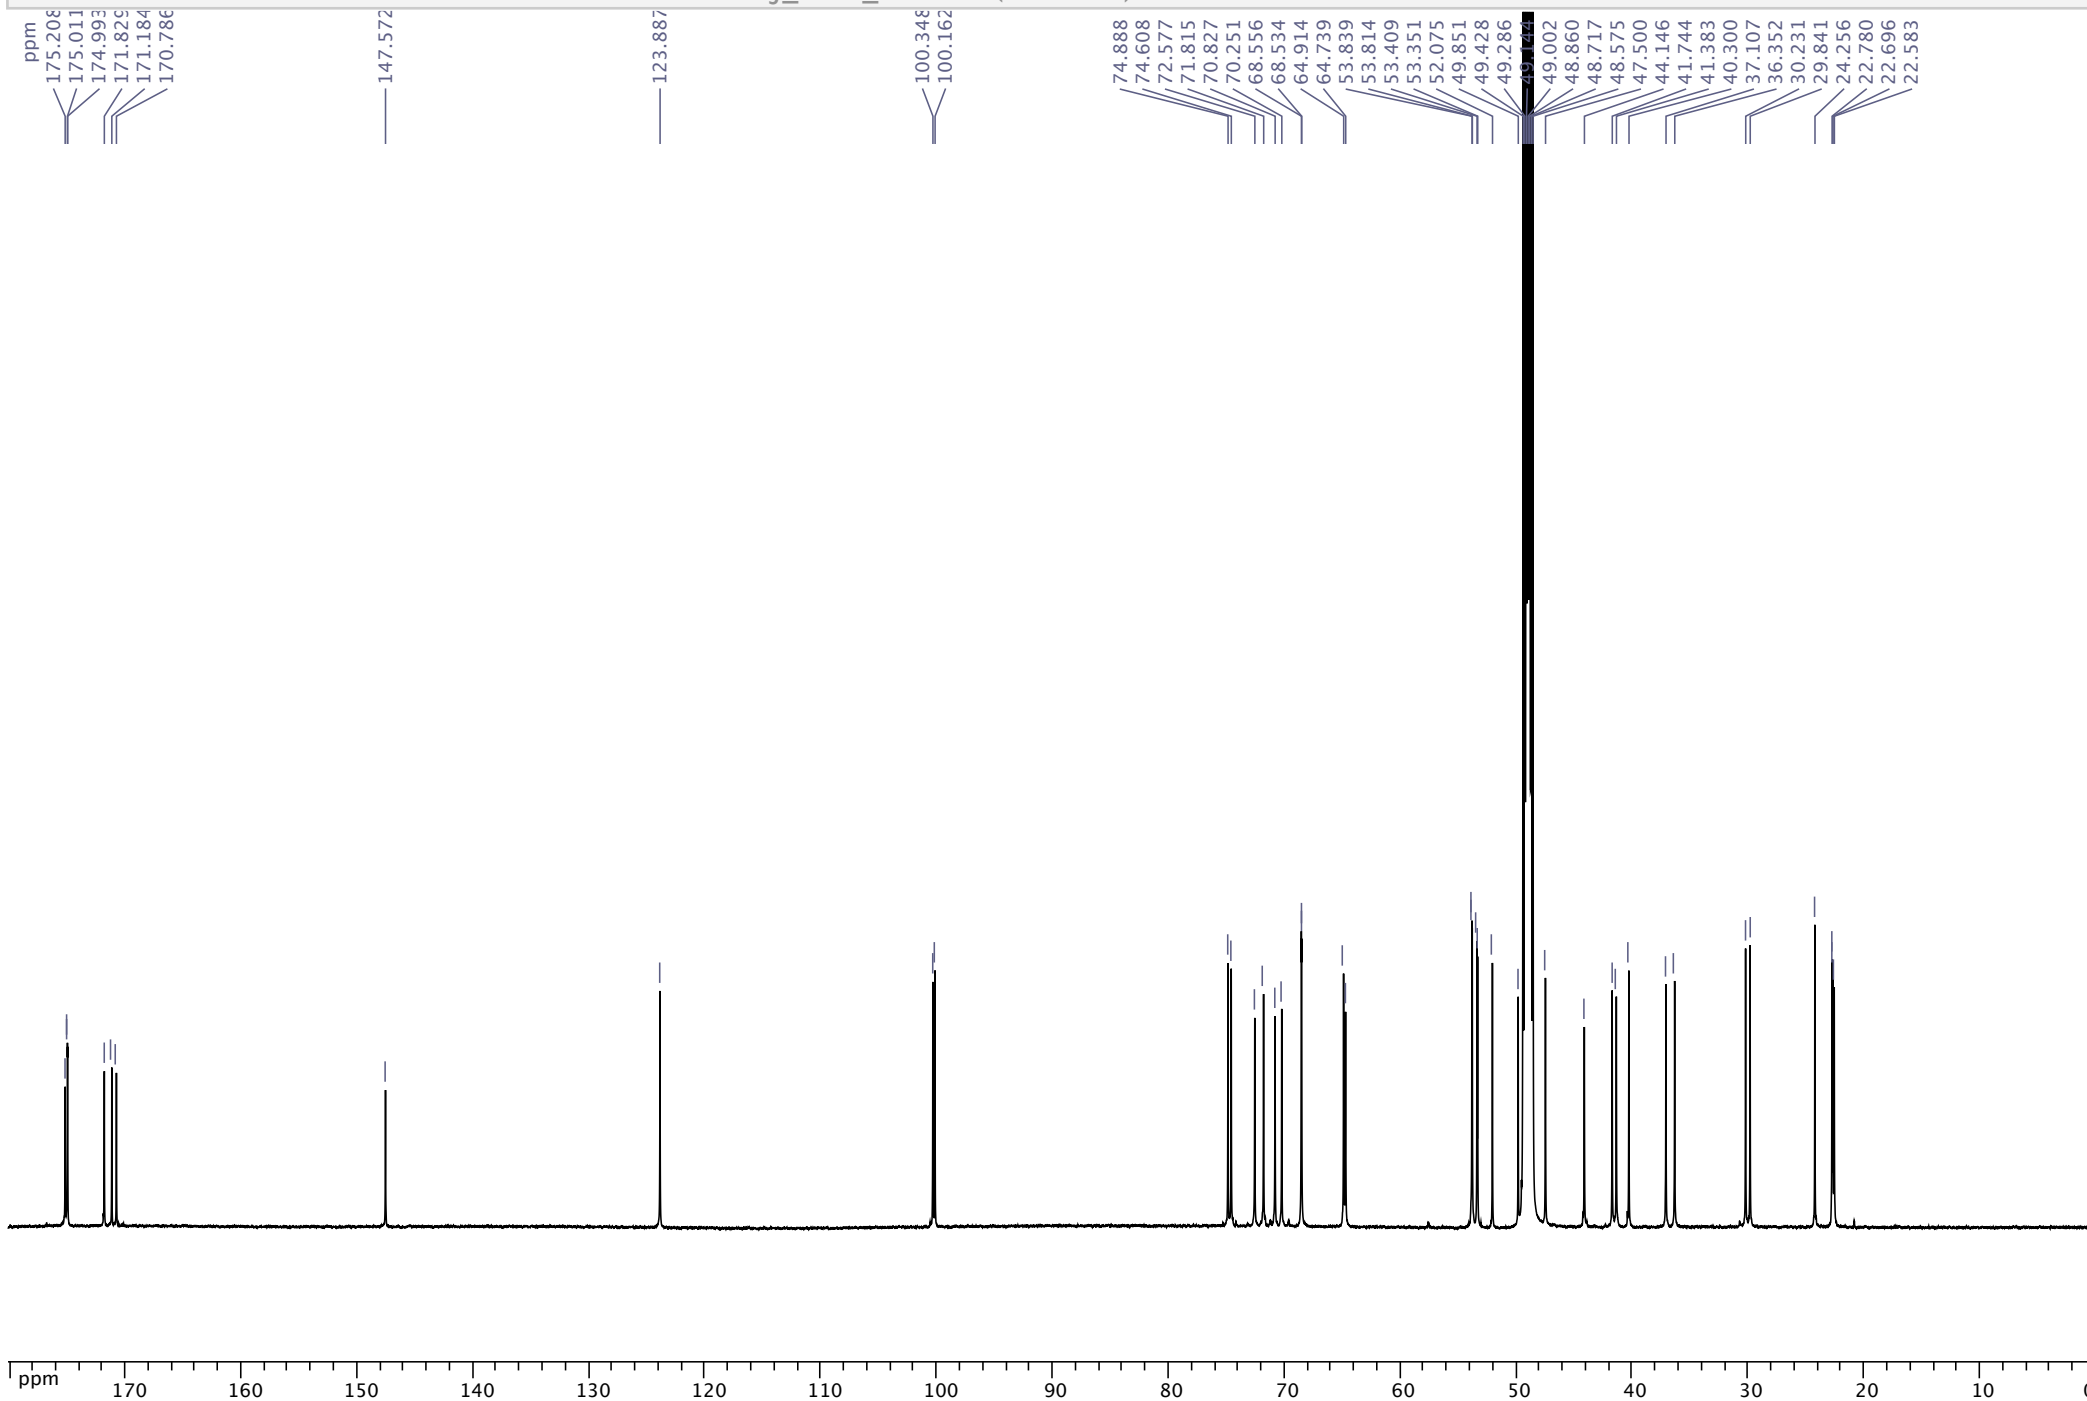

# Compound 14

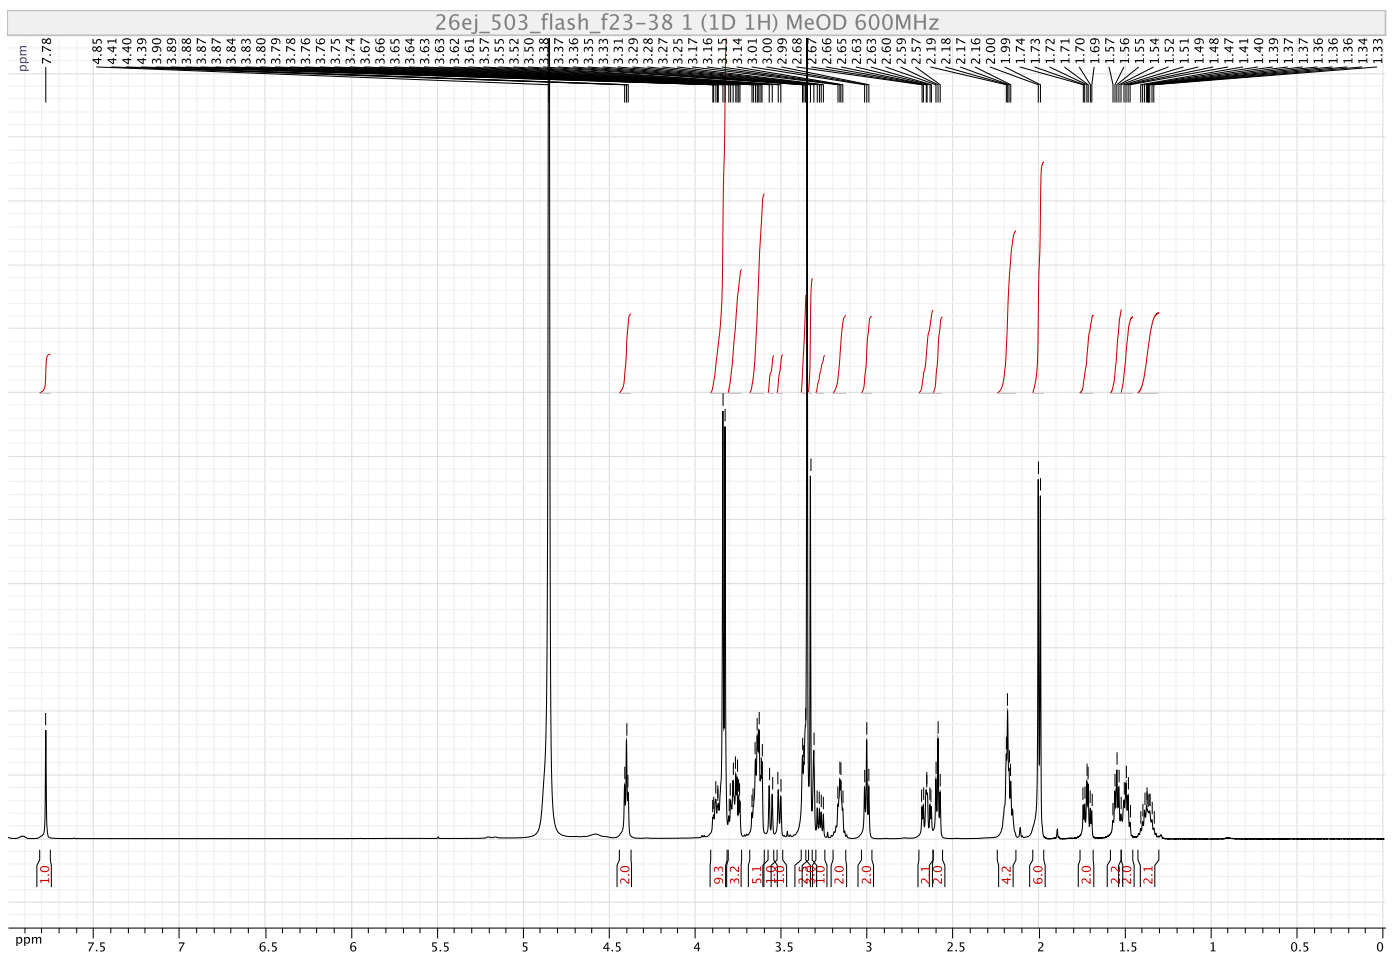



Compound 14

26ej\_503\_flash\_f23-38CNMR 2 (1D 13C) MeOD 600MHz

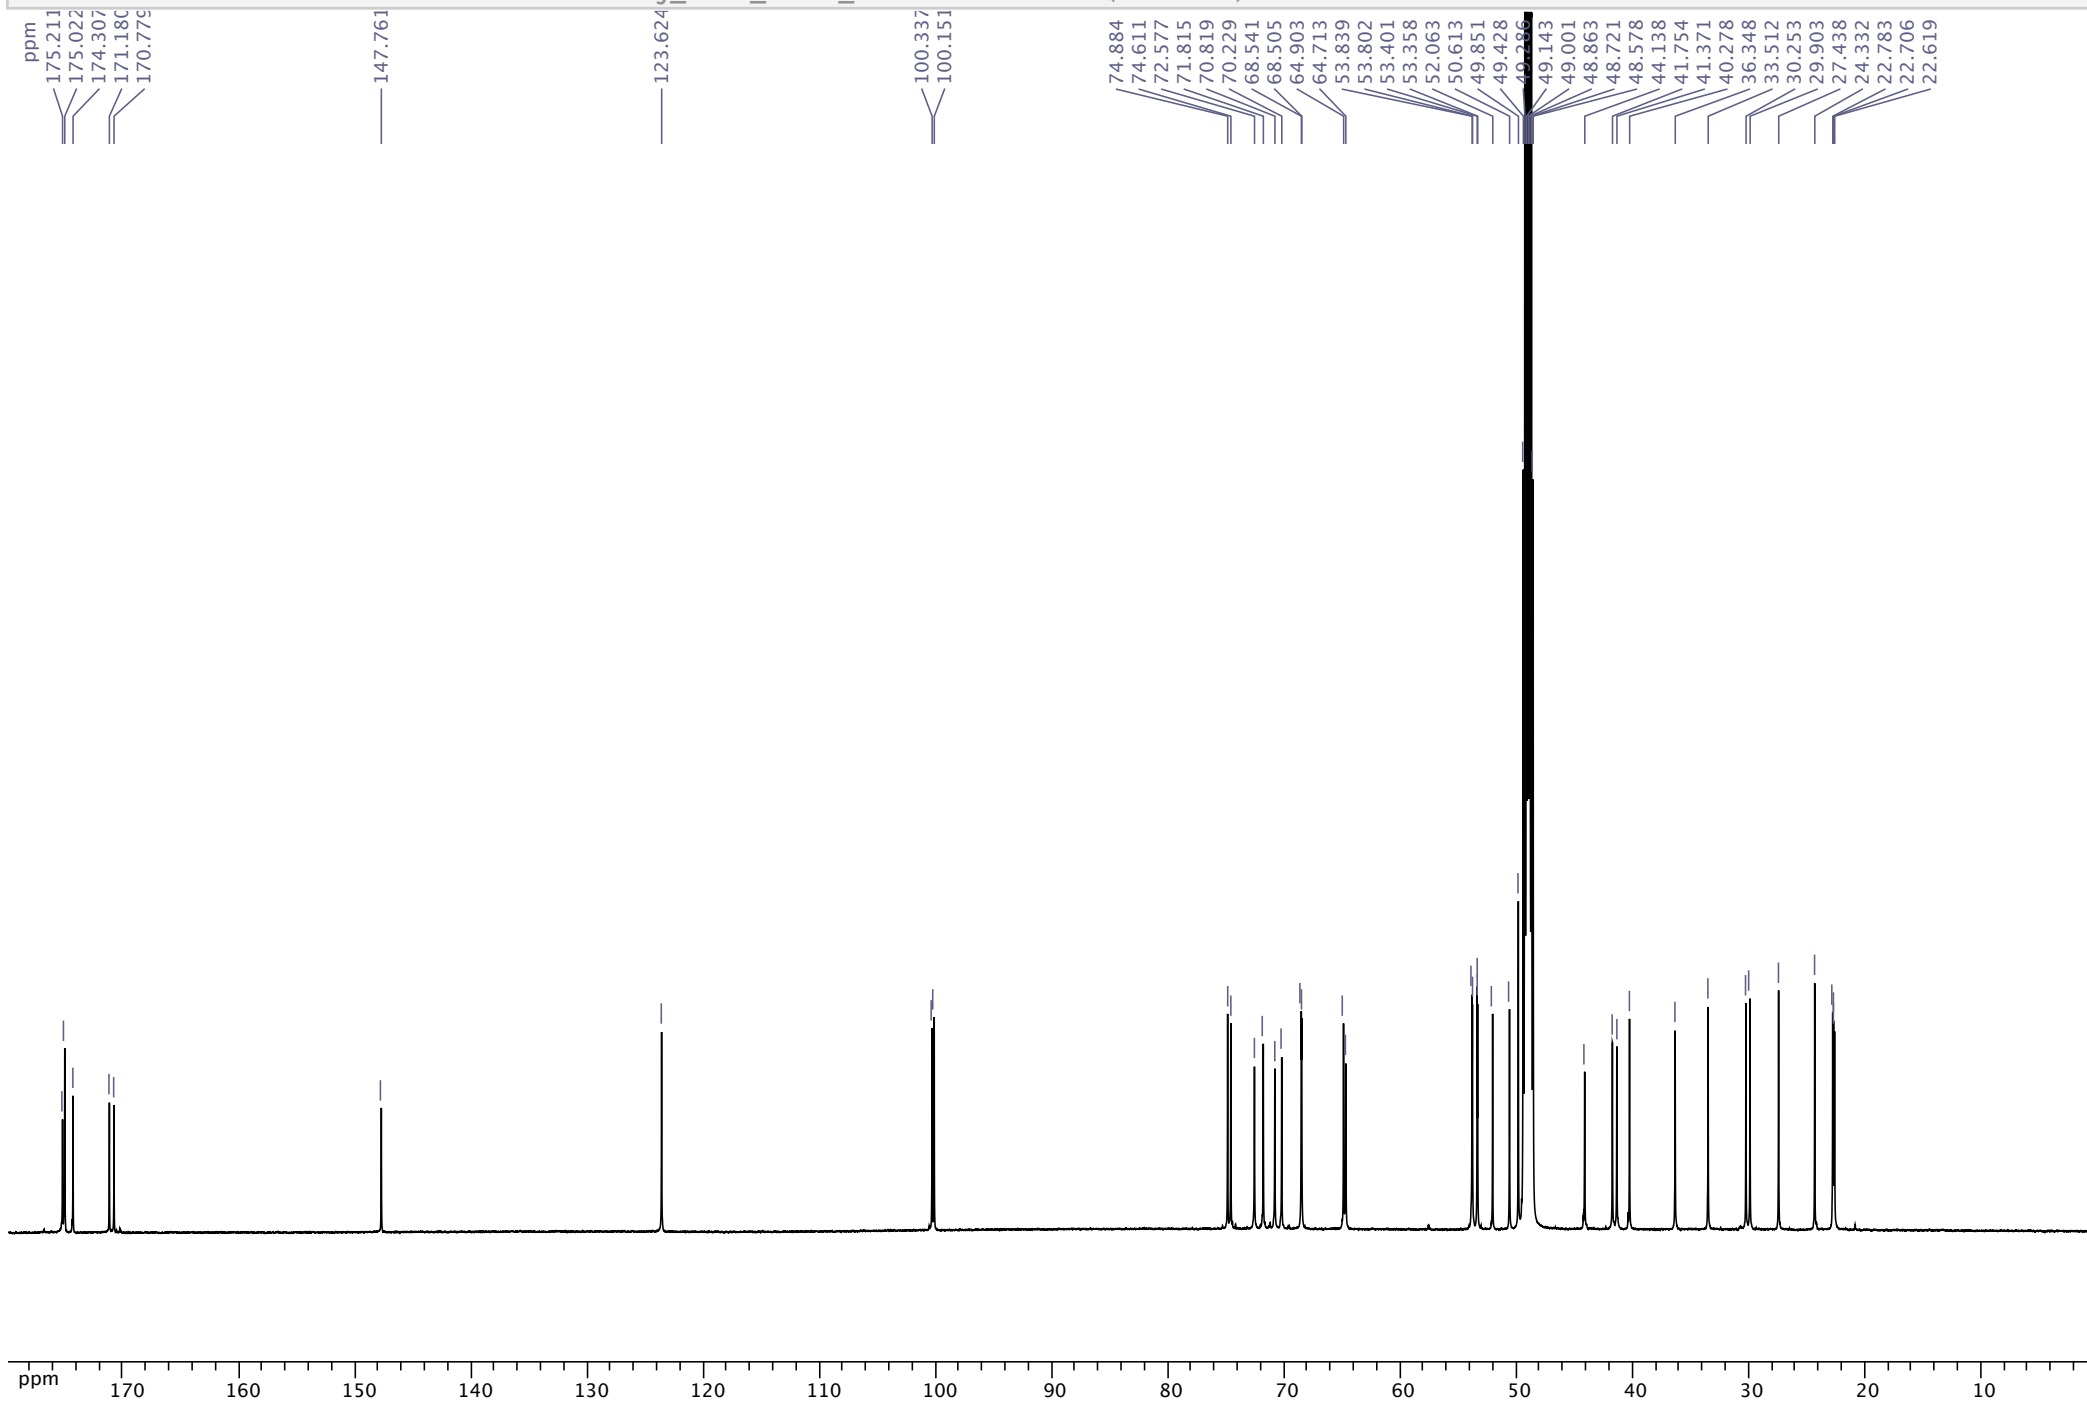

Compound 15

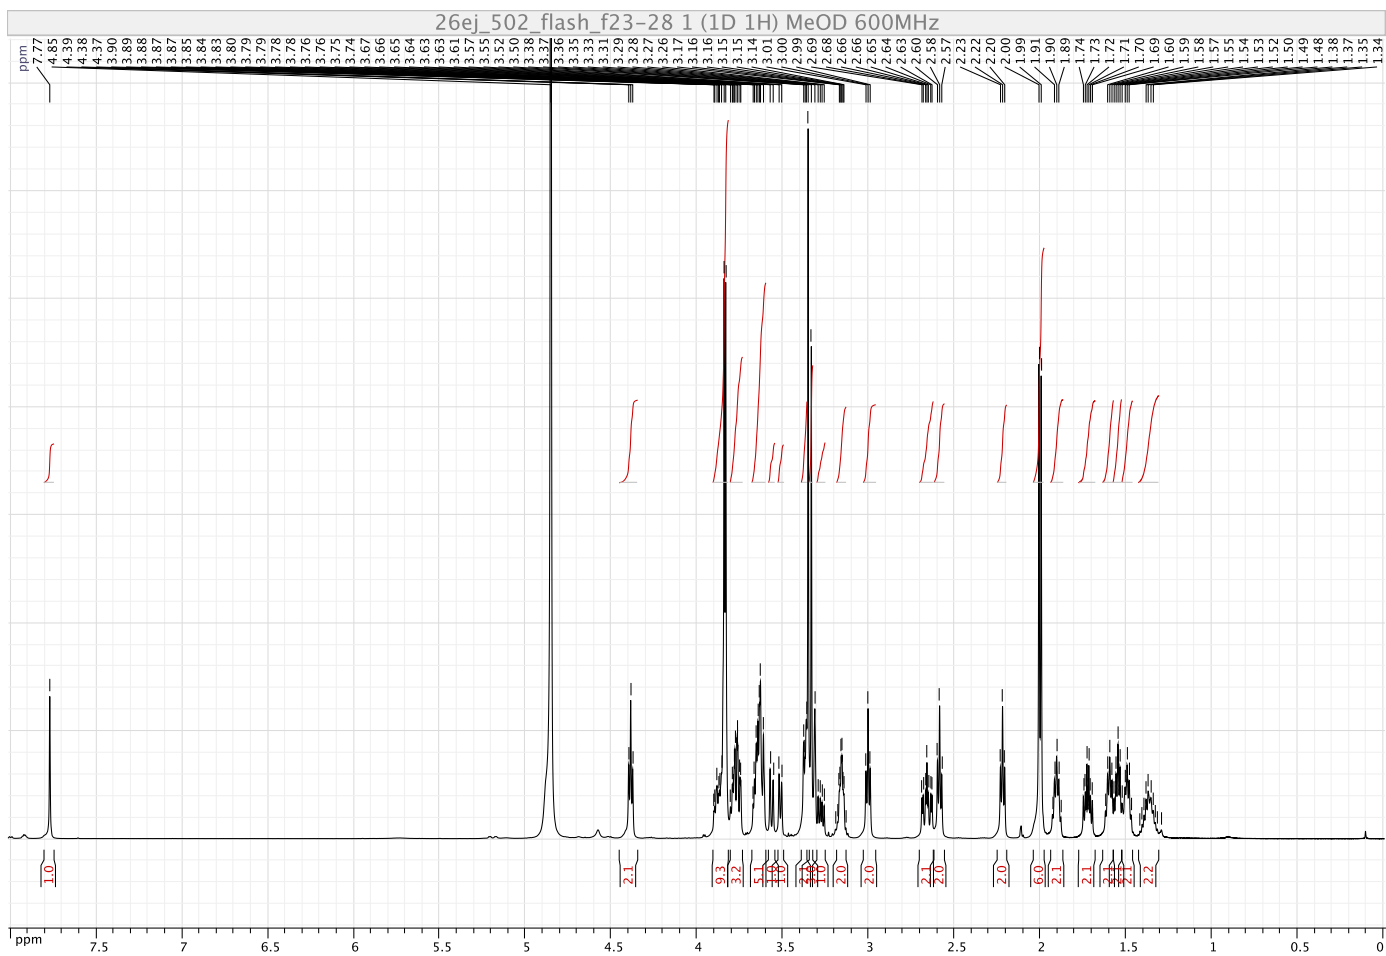

# Compound 15

26ej\_502\_flash\_f23-28 2 (1D 13C) MeOD 600MHz

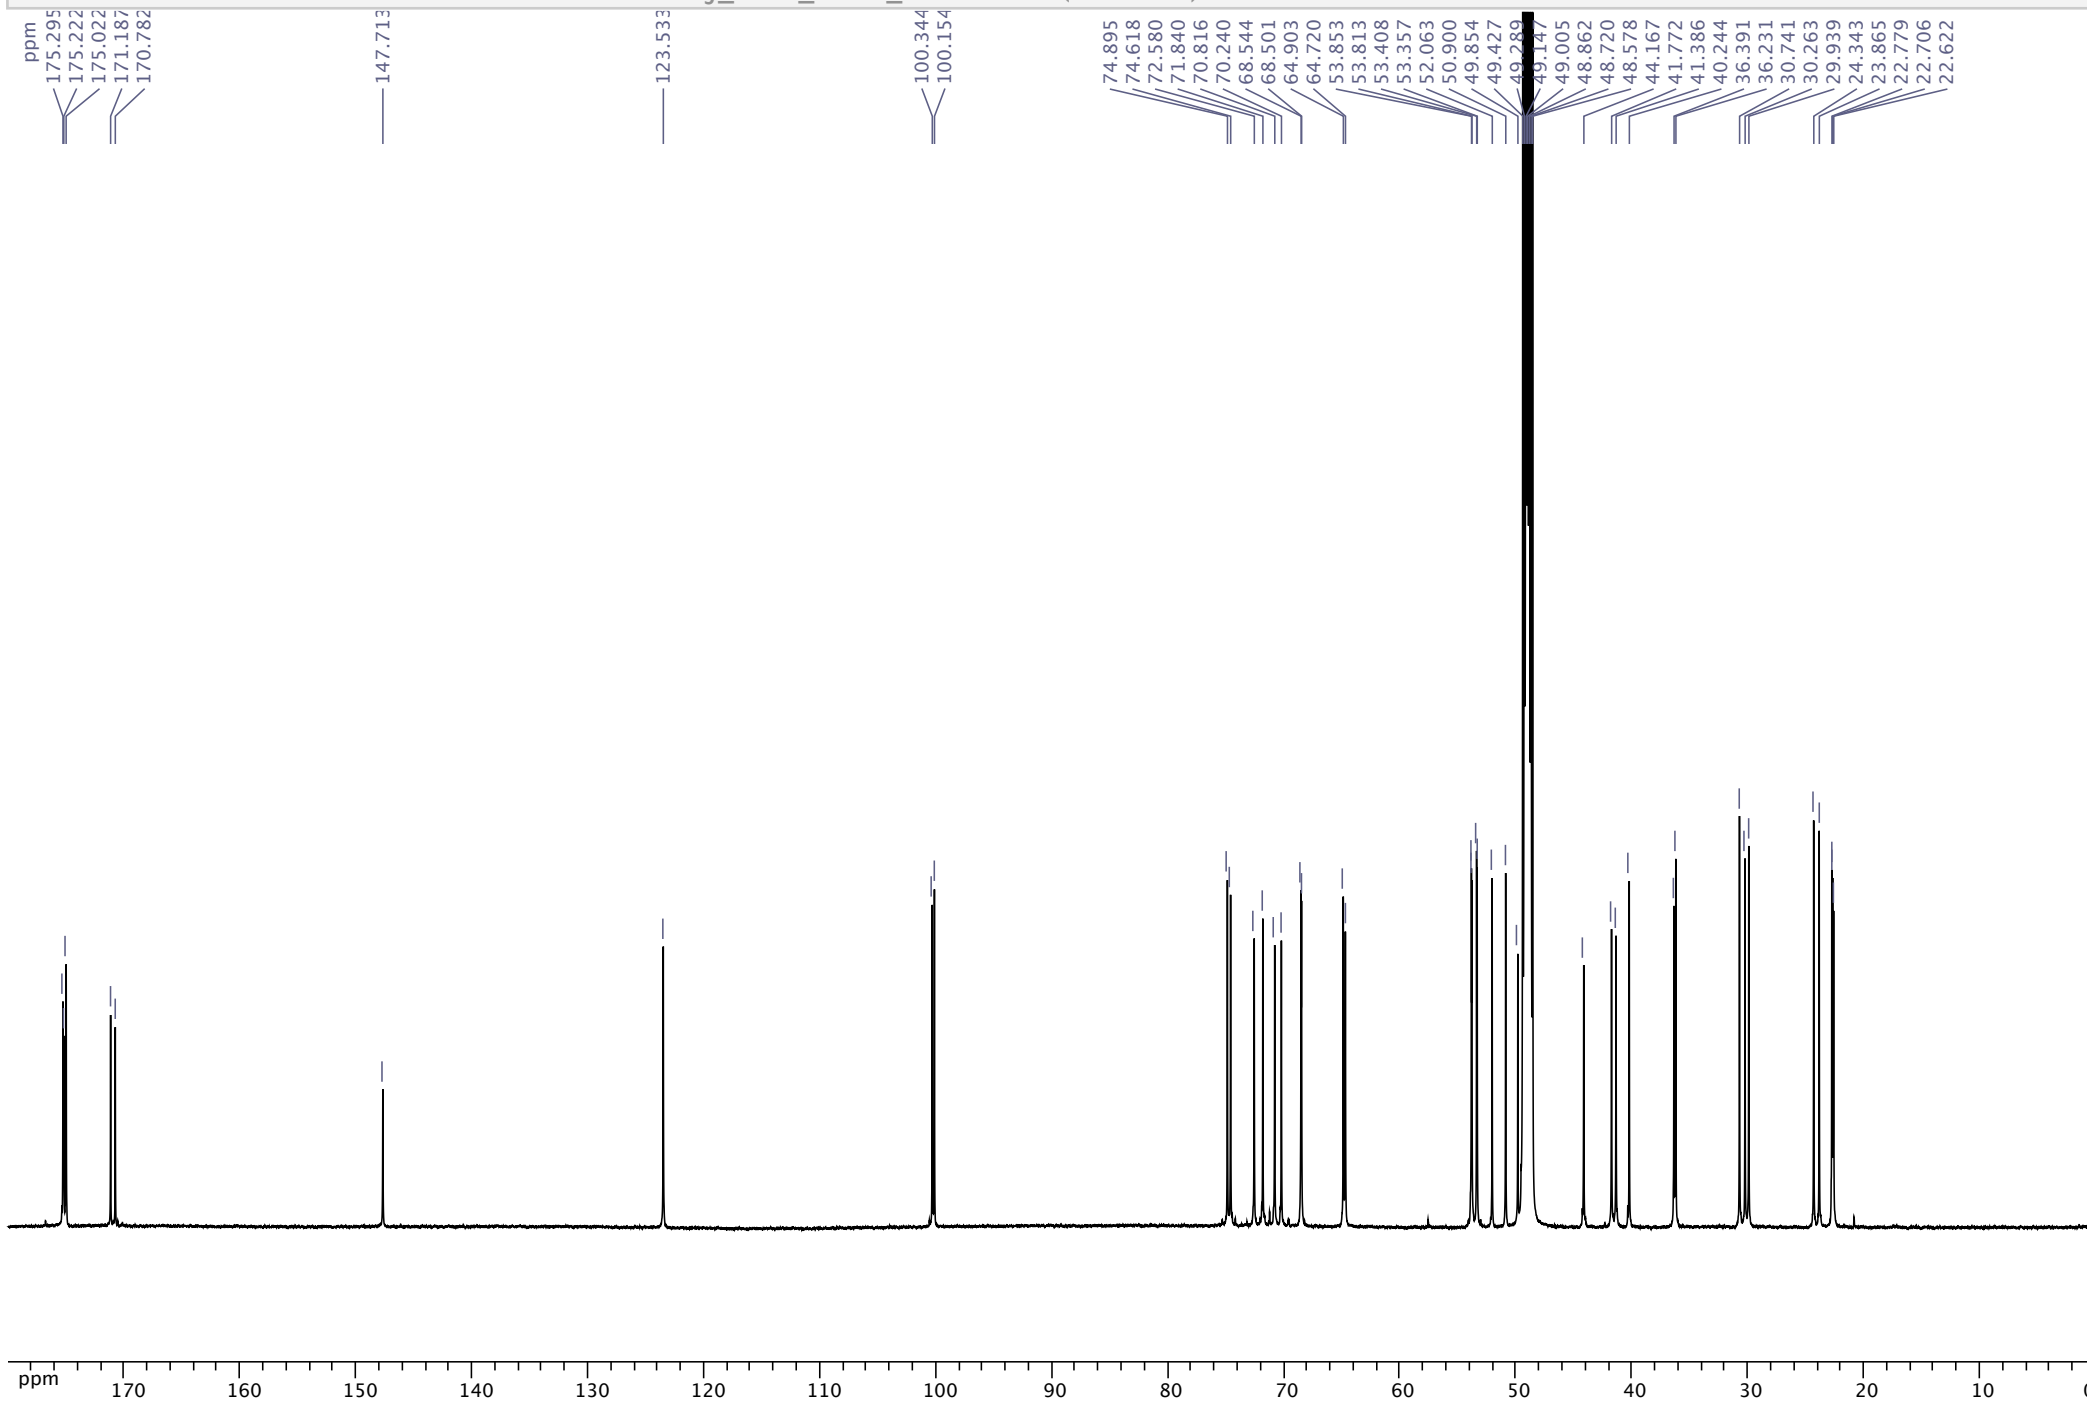

# Compound 15 (ME1064)

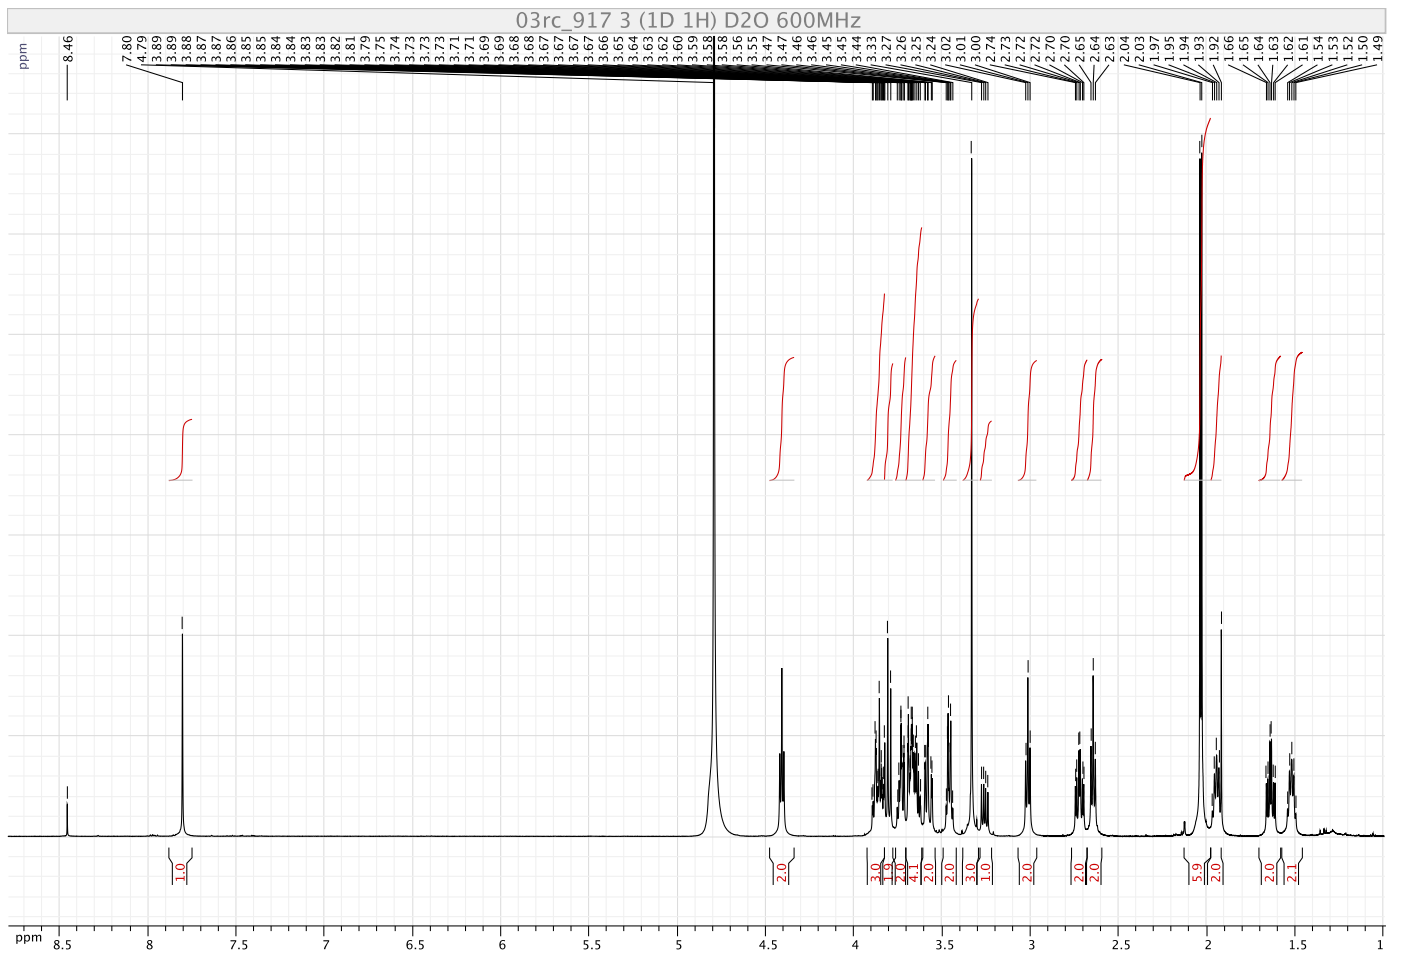

# Compound 15 (ME1064)

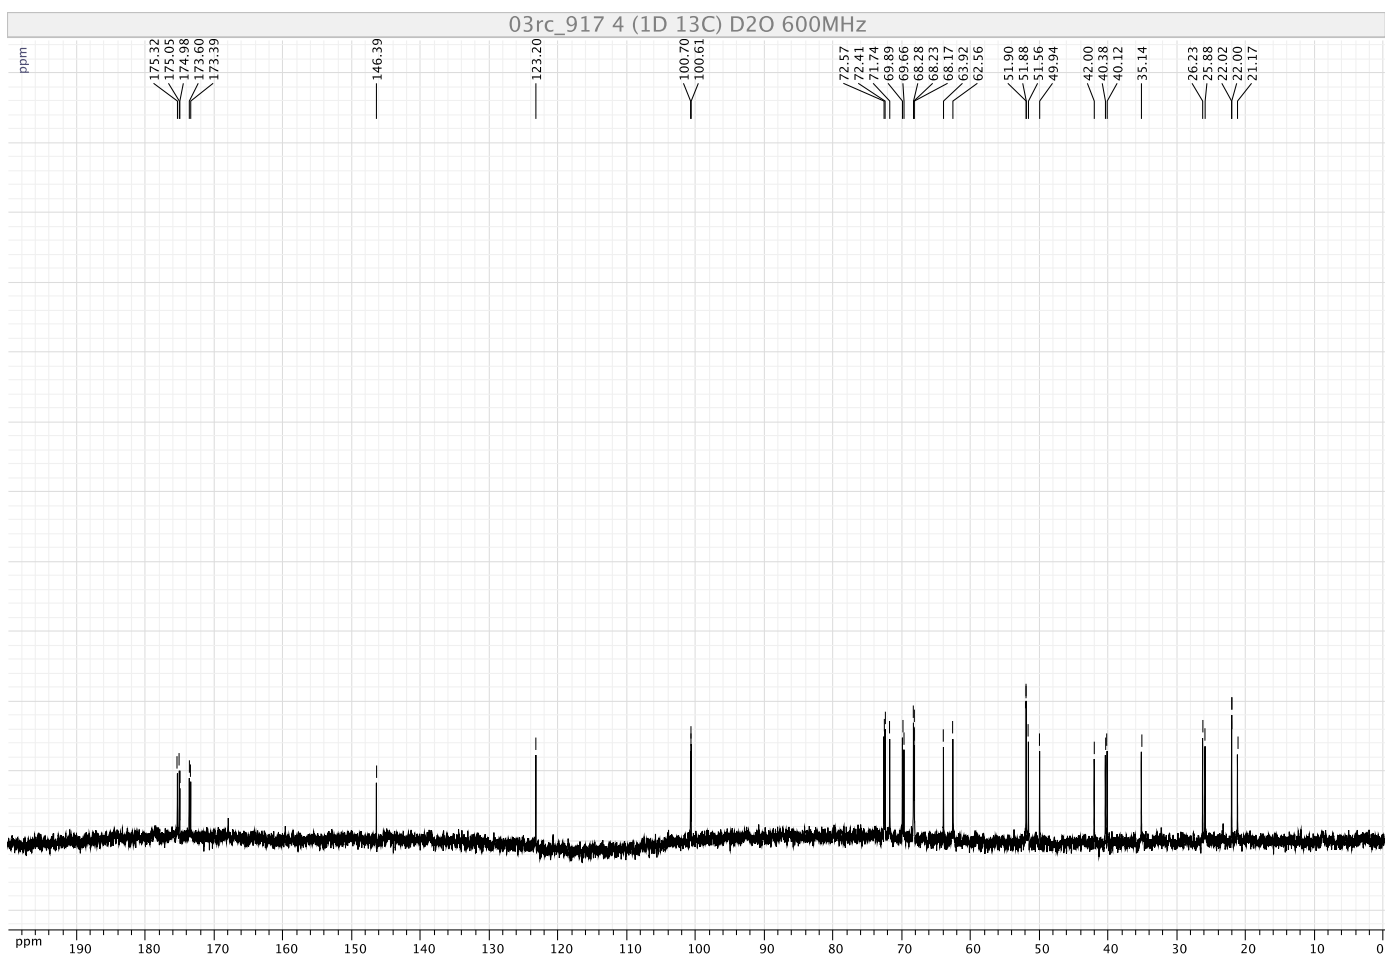

Compound 17 (ME1067)

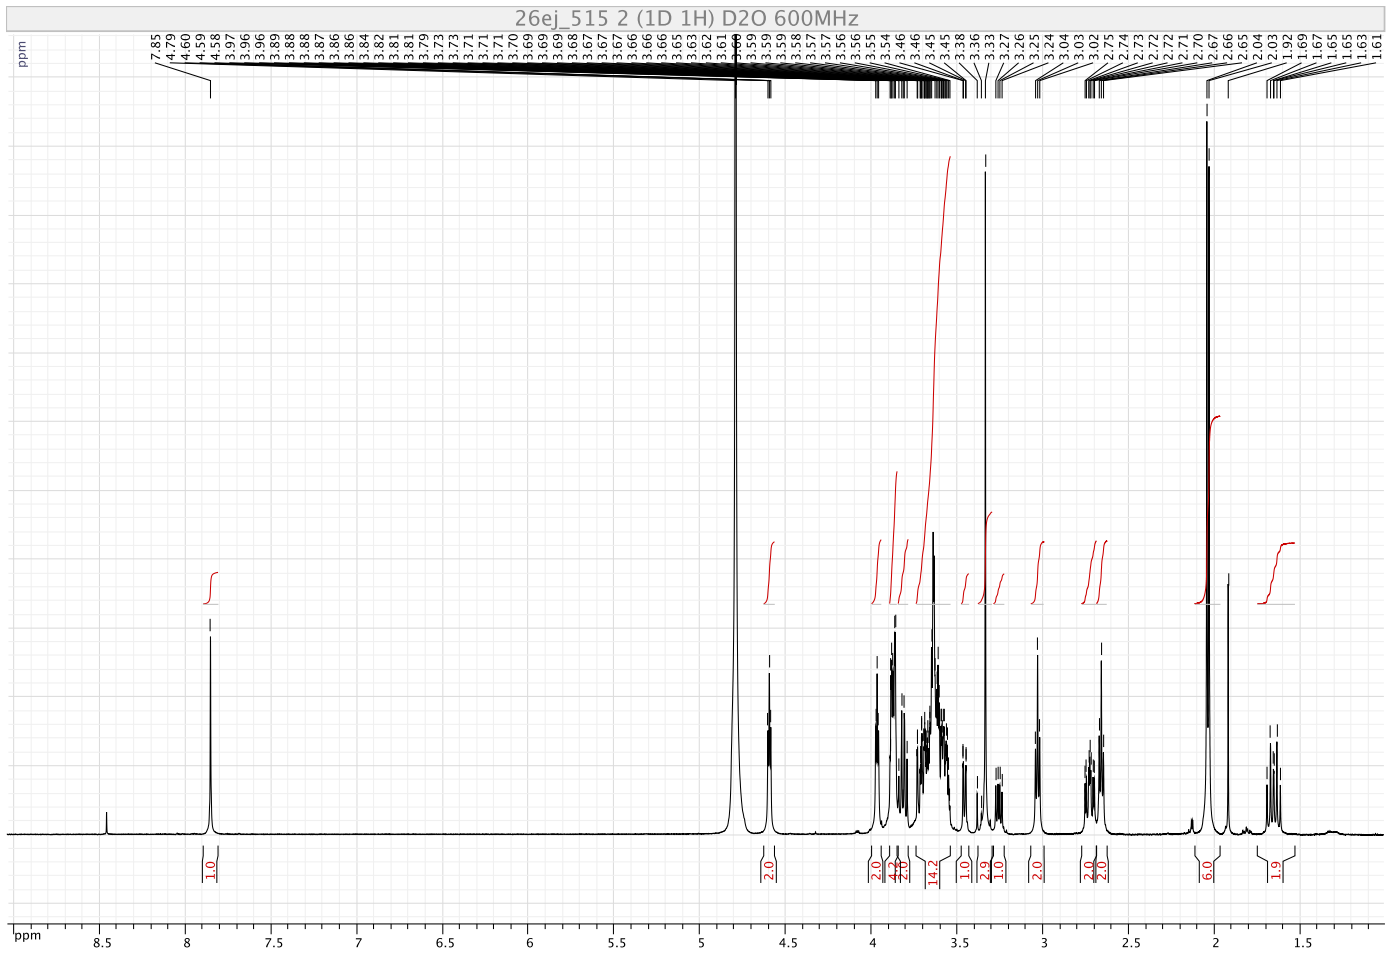

# Compound 17 (ME1067)

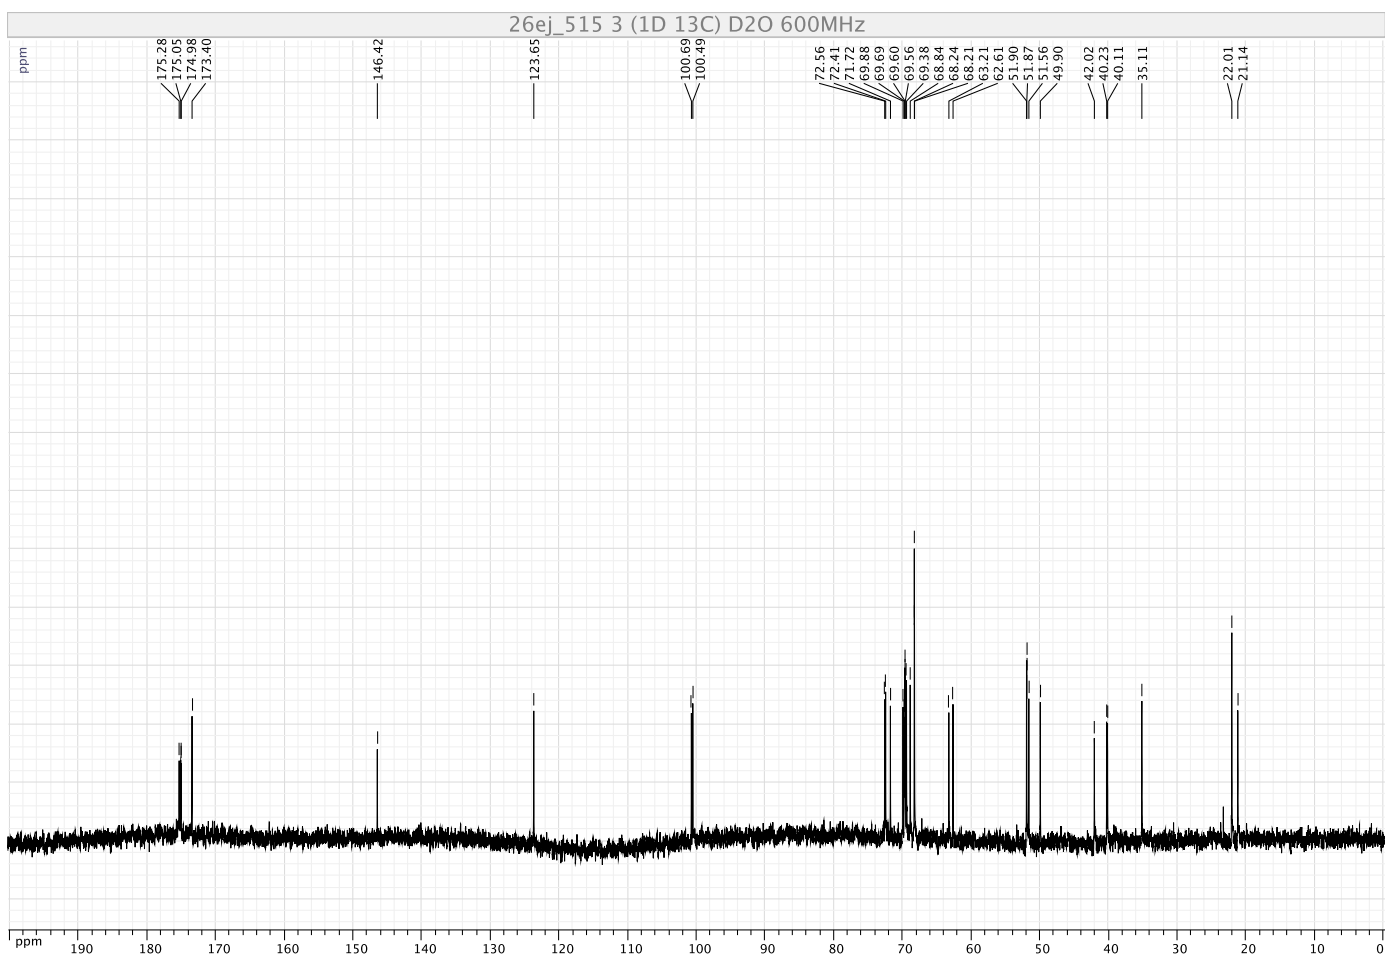

# Compound 18 (ME1065)

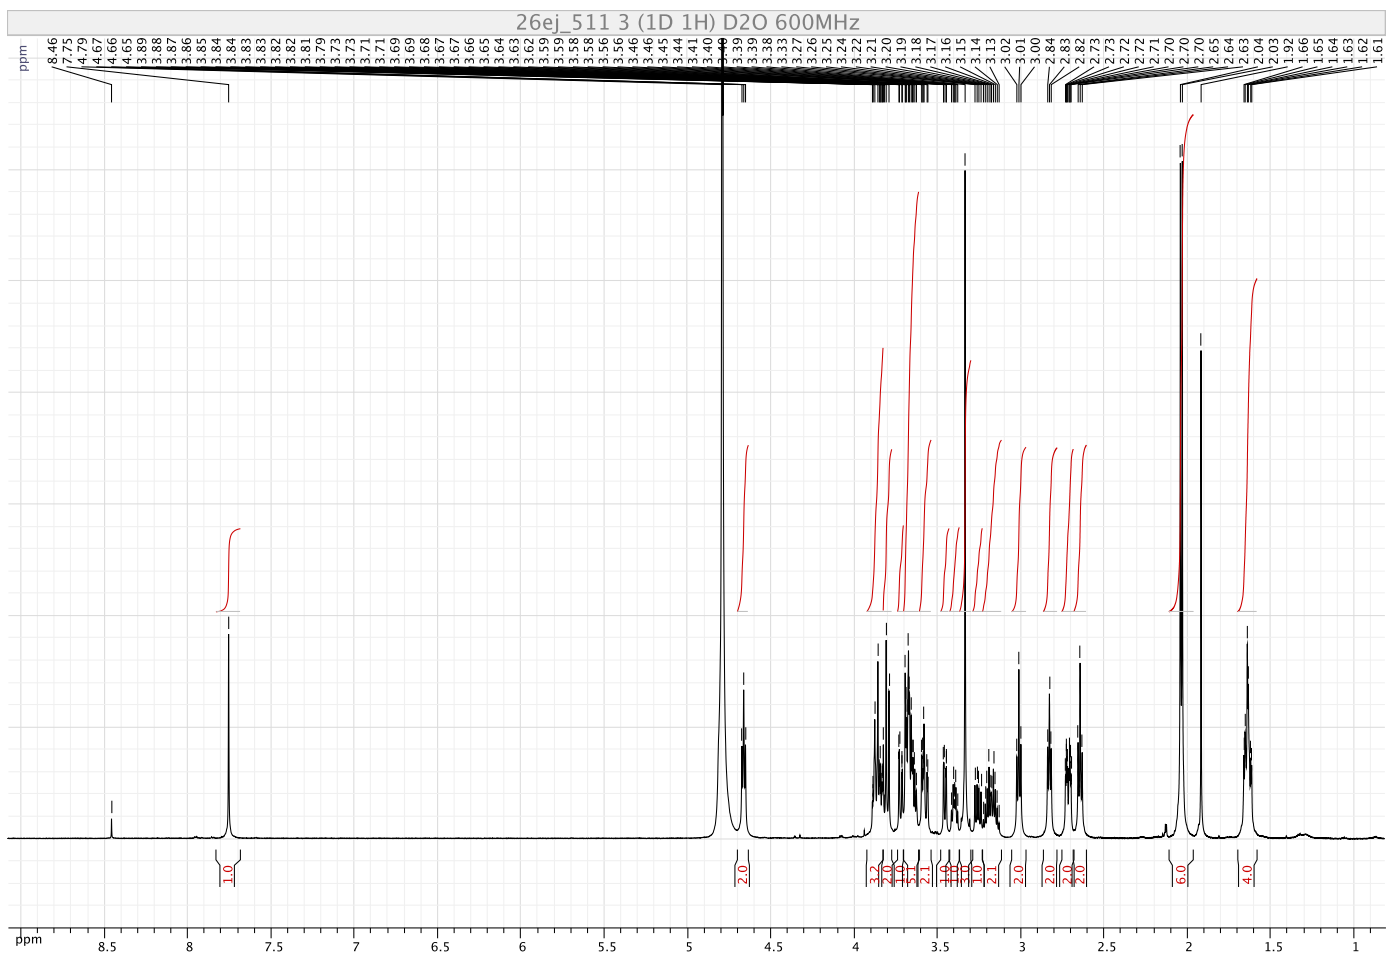



# Compound 18 (ME1065)

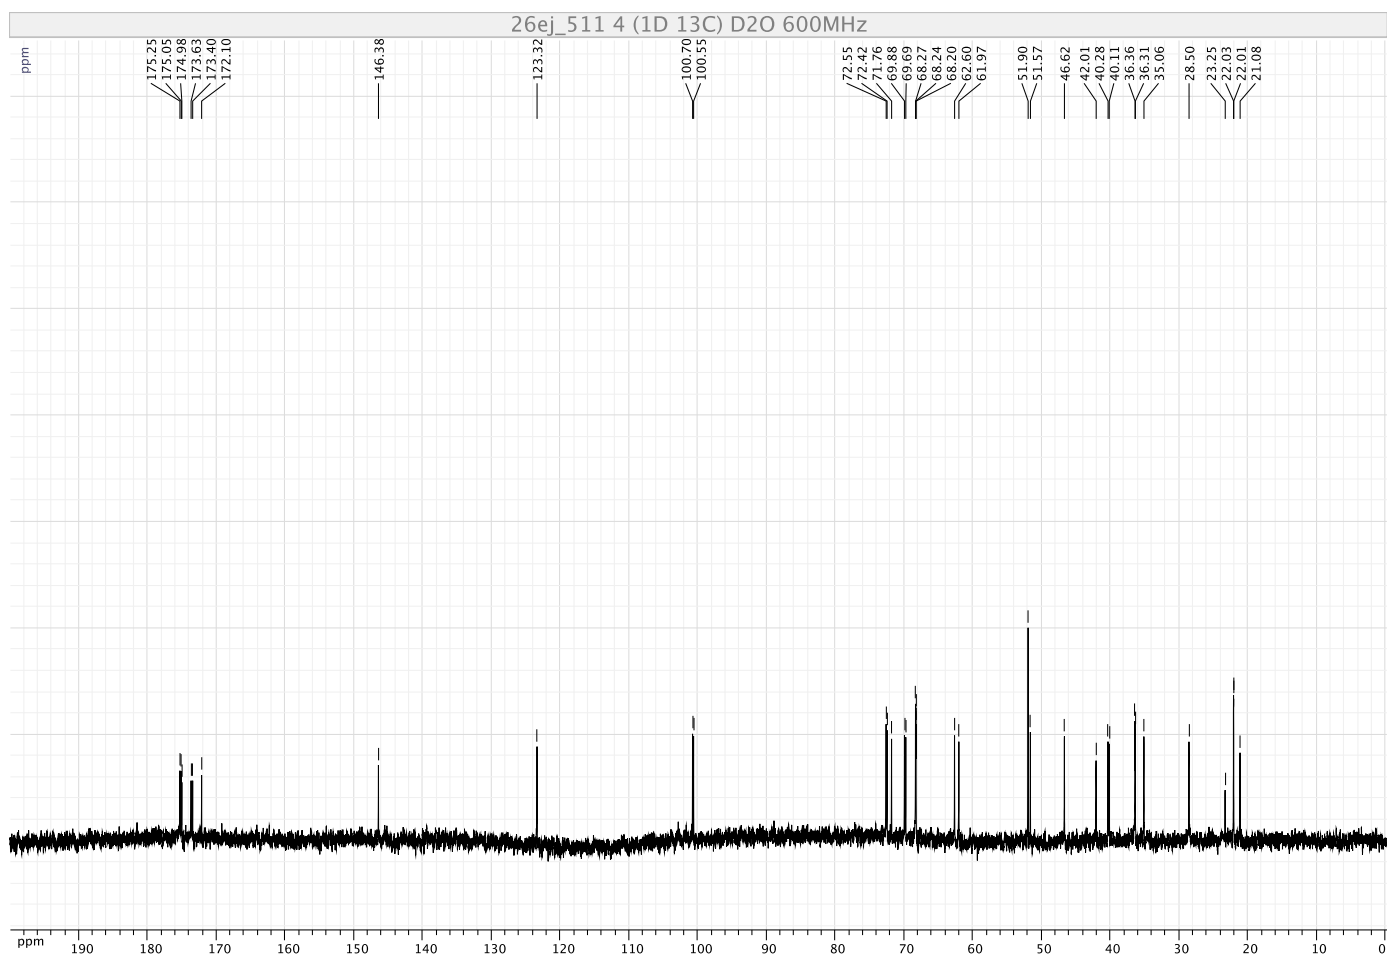

# Compound 19 (ME1068)

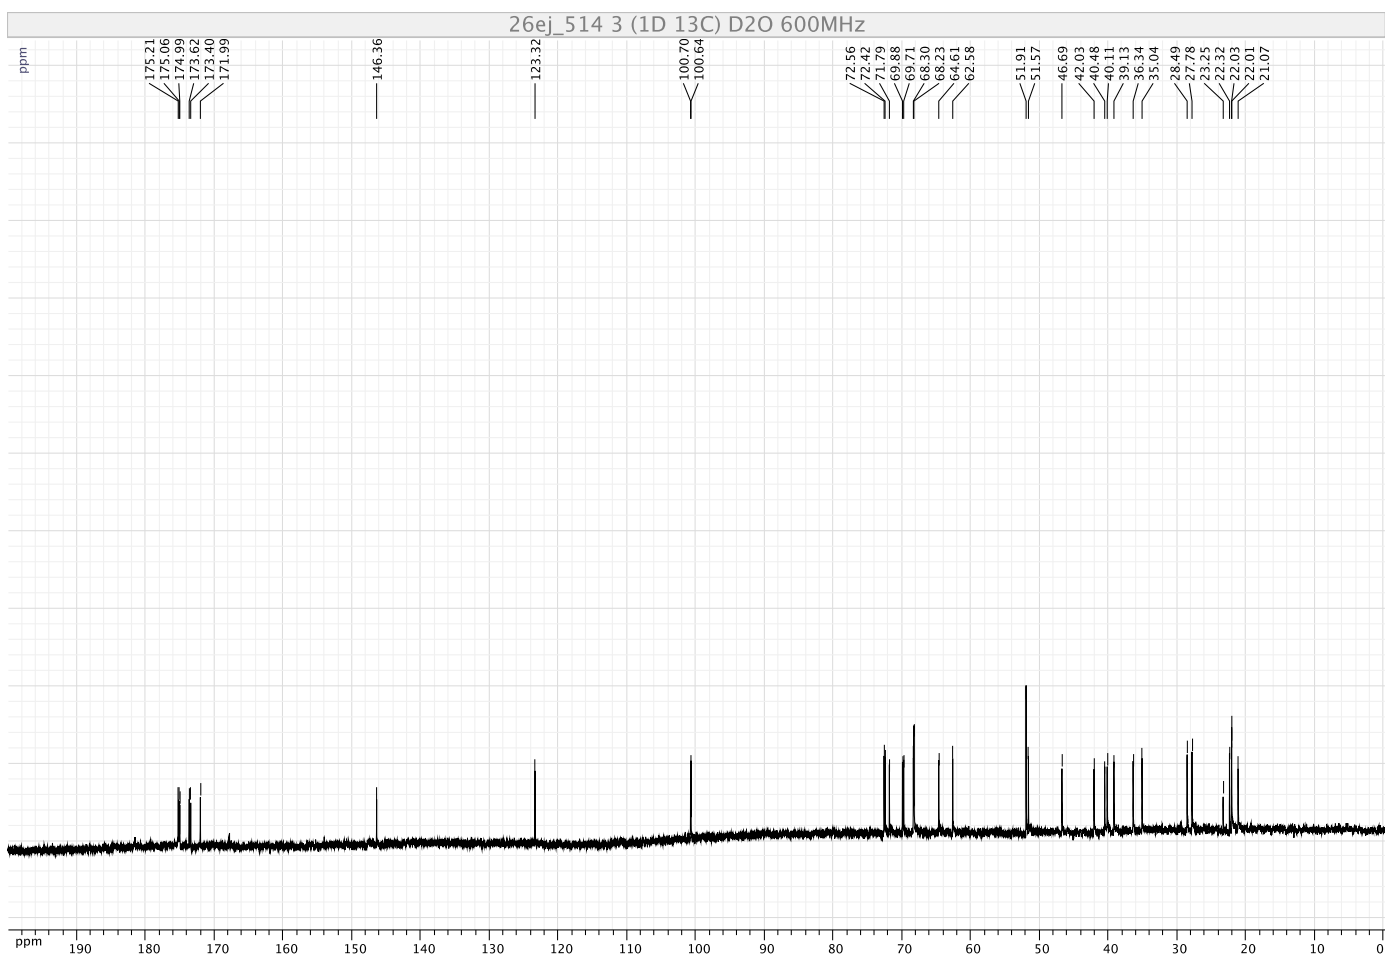

# Compound 19 (ME1068)

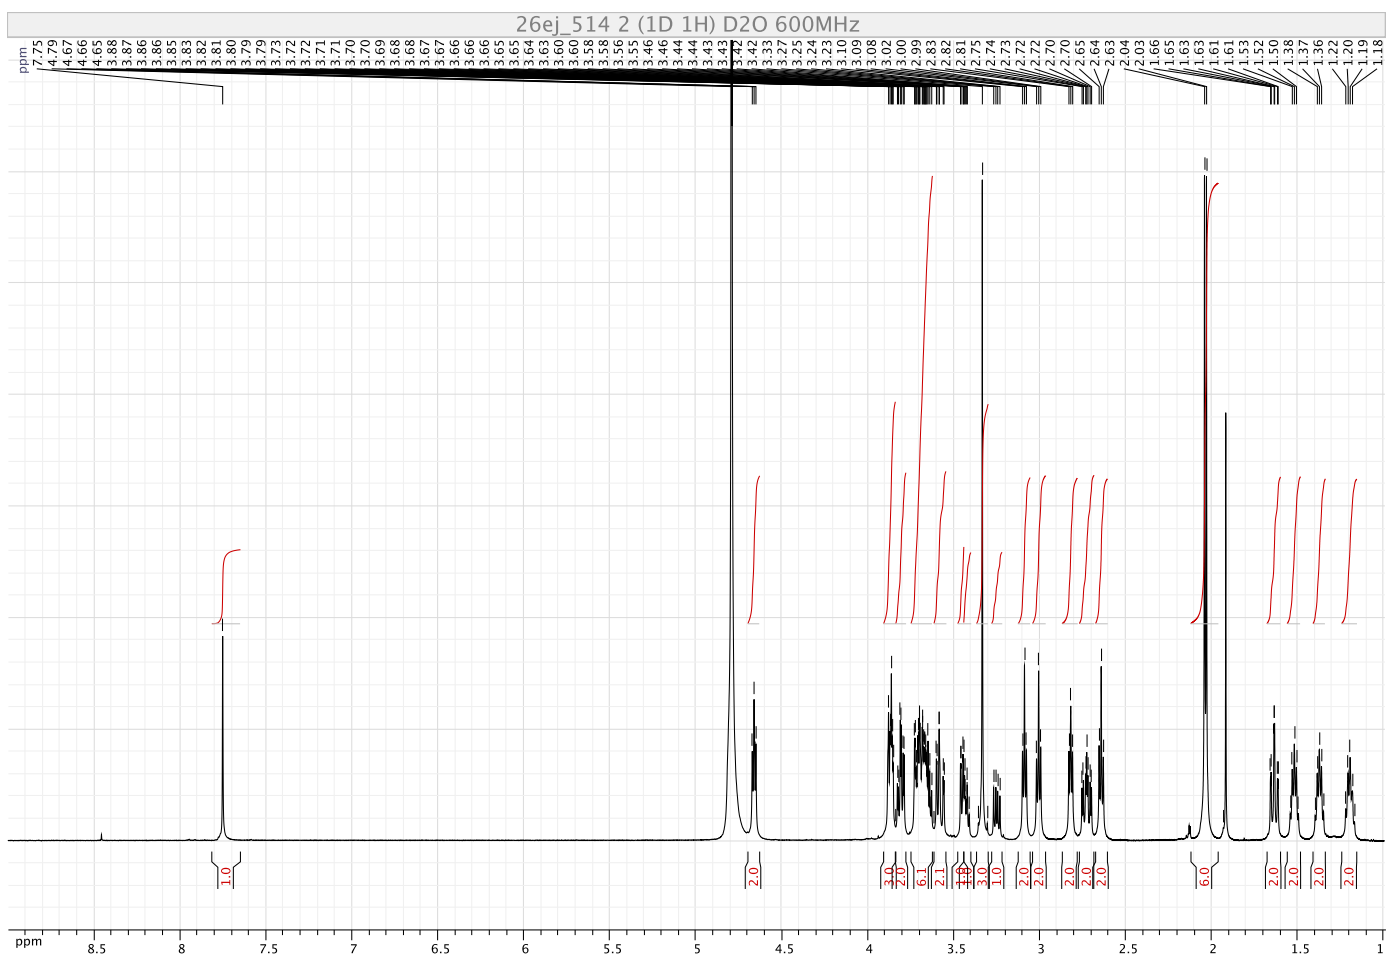

Compound 20 (ME1069)

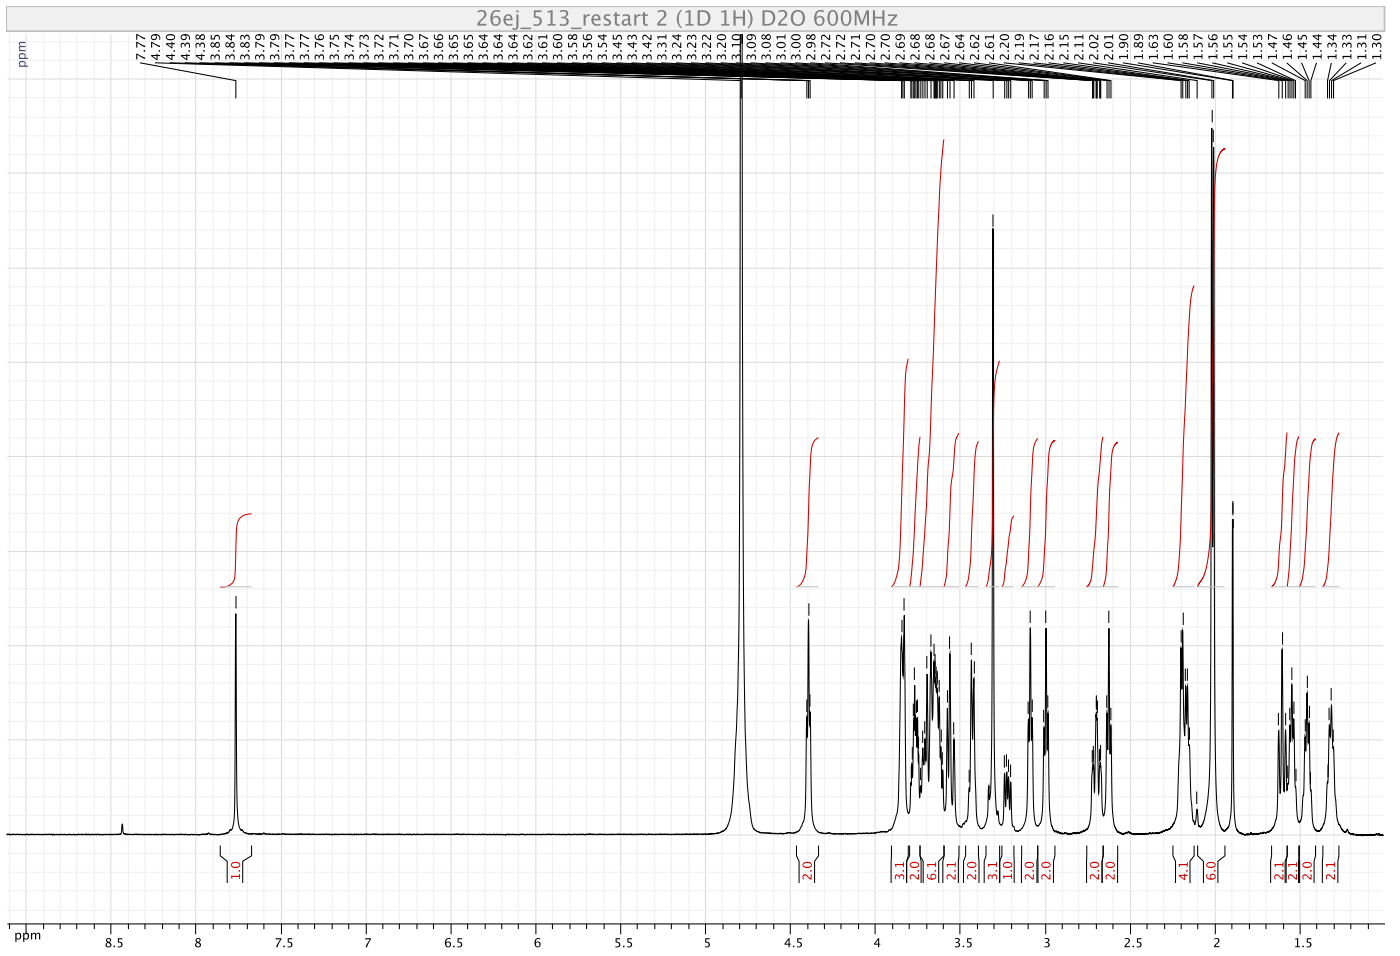

Compound 20 (ME1069)

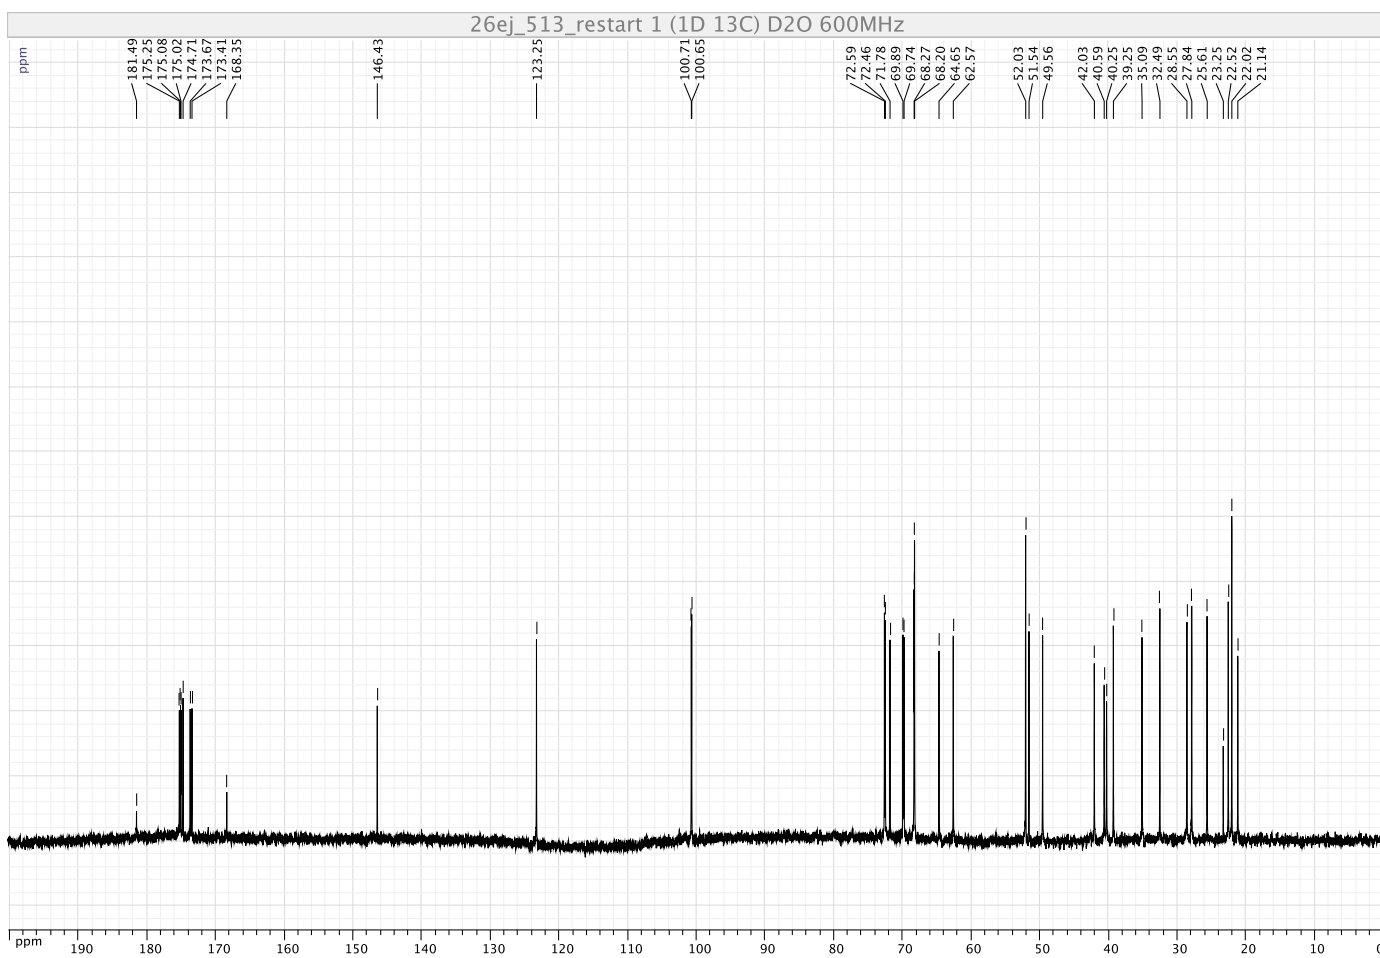

# Compound 21 (ME1070)

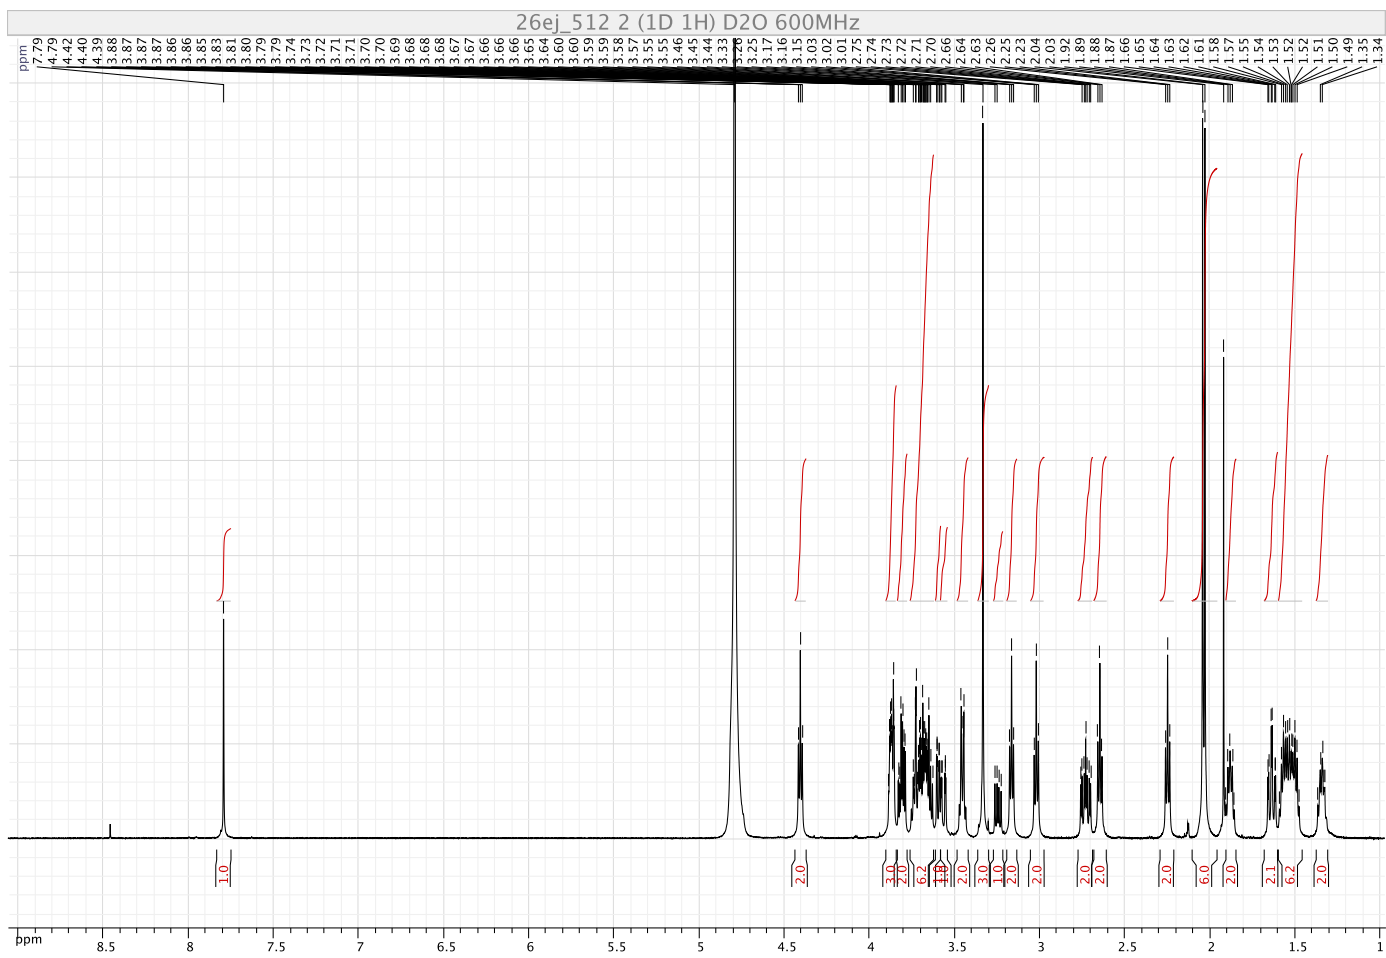

# Compound 21 (ME1070)

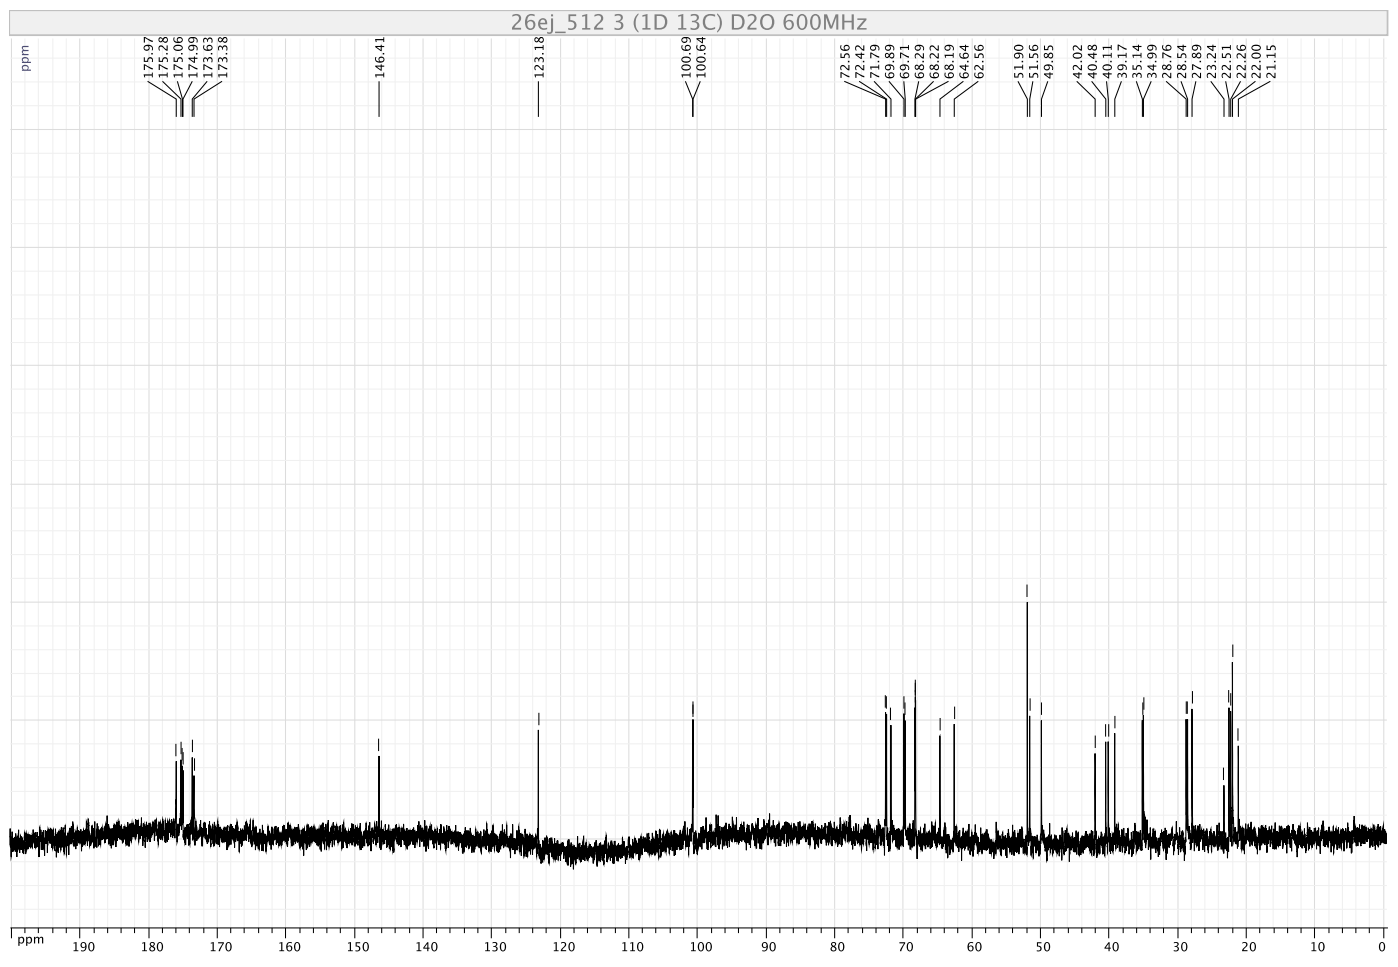

# Compound 25

C25\_26EJ\_971 (1D 1H) MeOD 400MHz

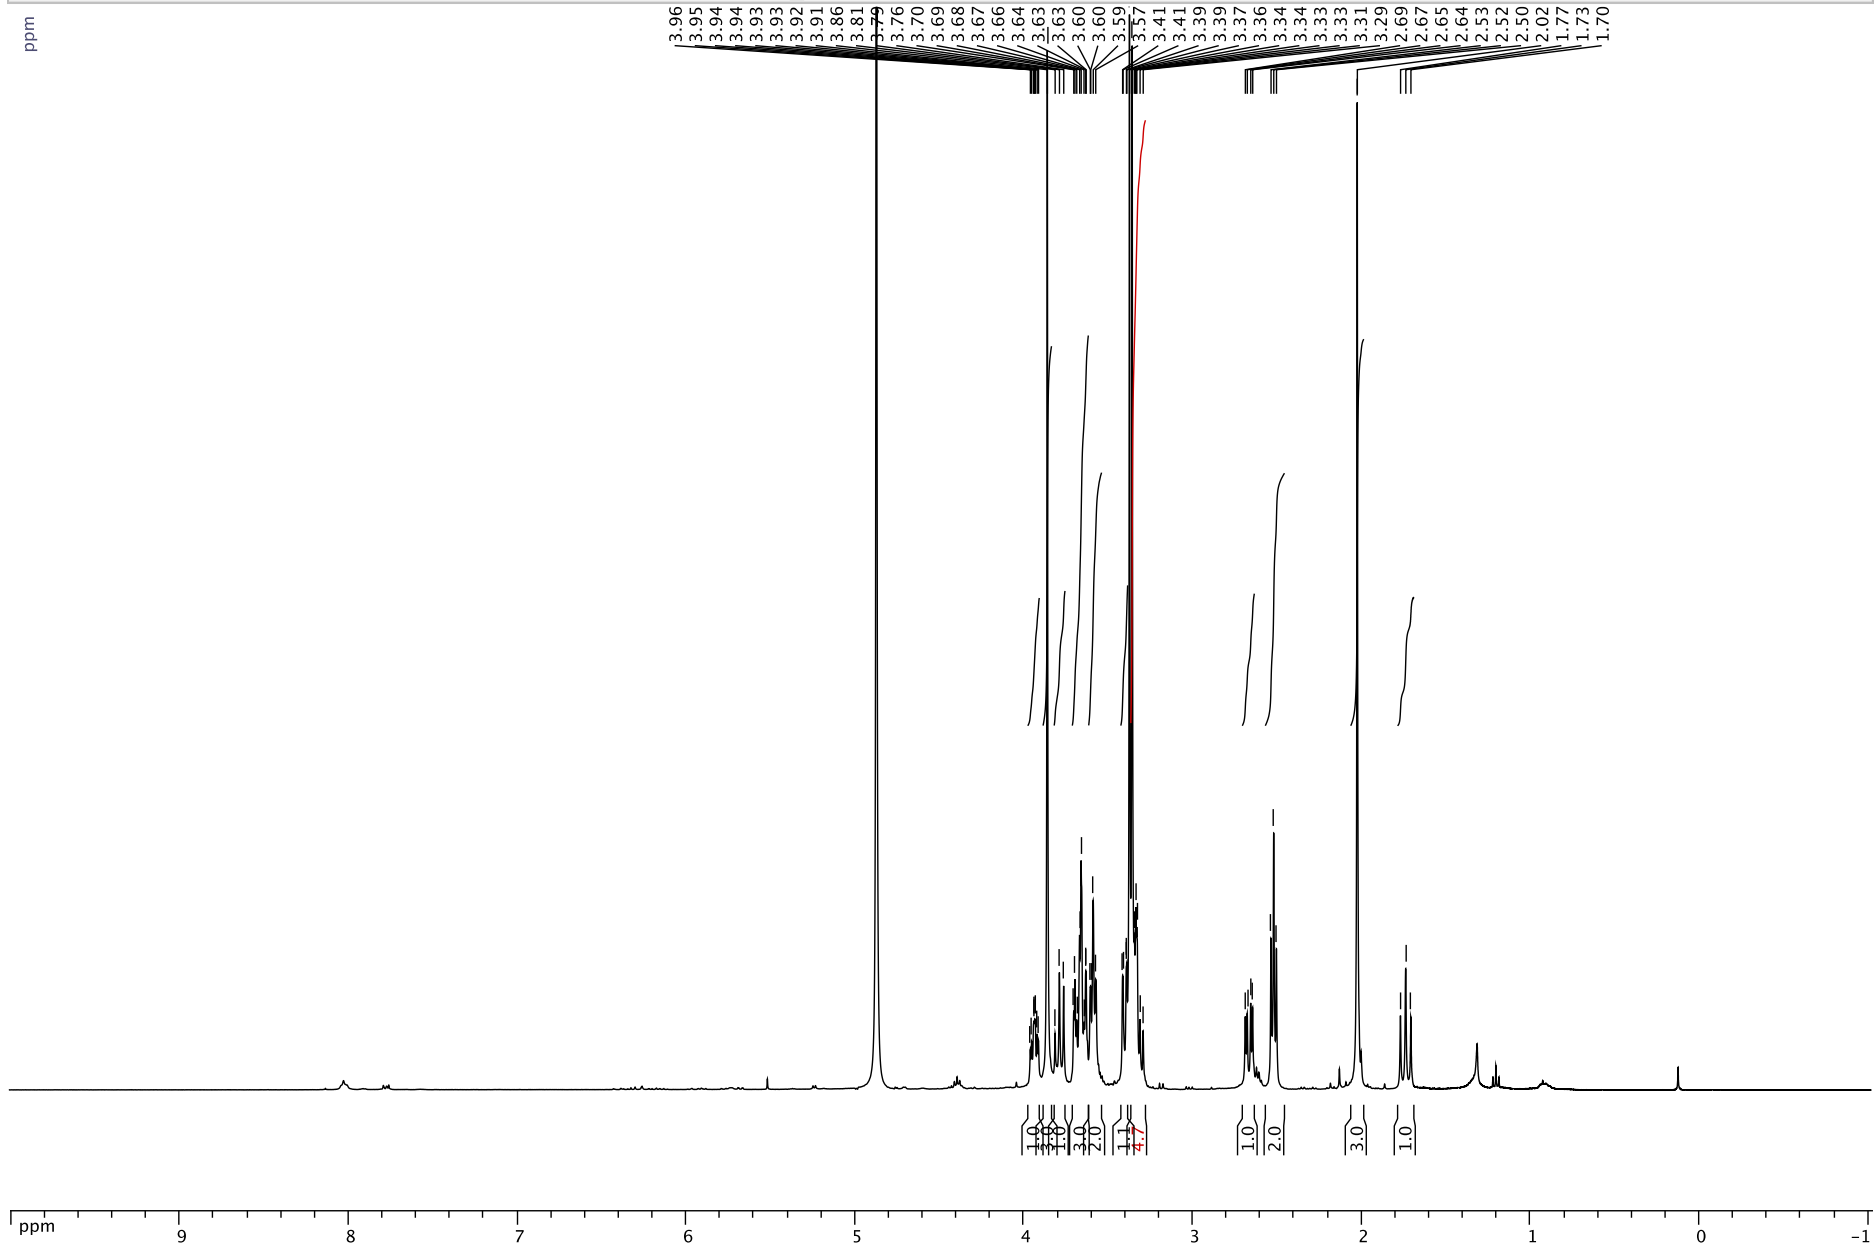



# Compound 25

26EJ\_971 3 (1D 13C) MeOD 400MHz

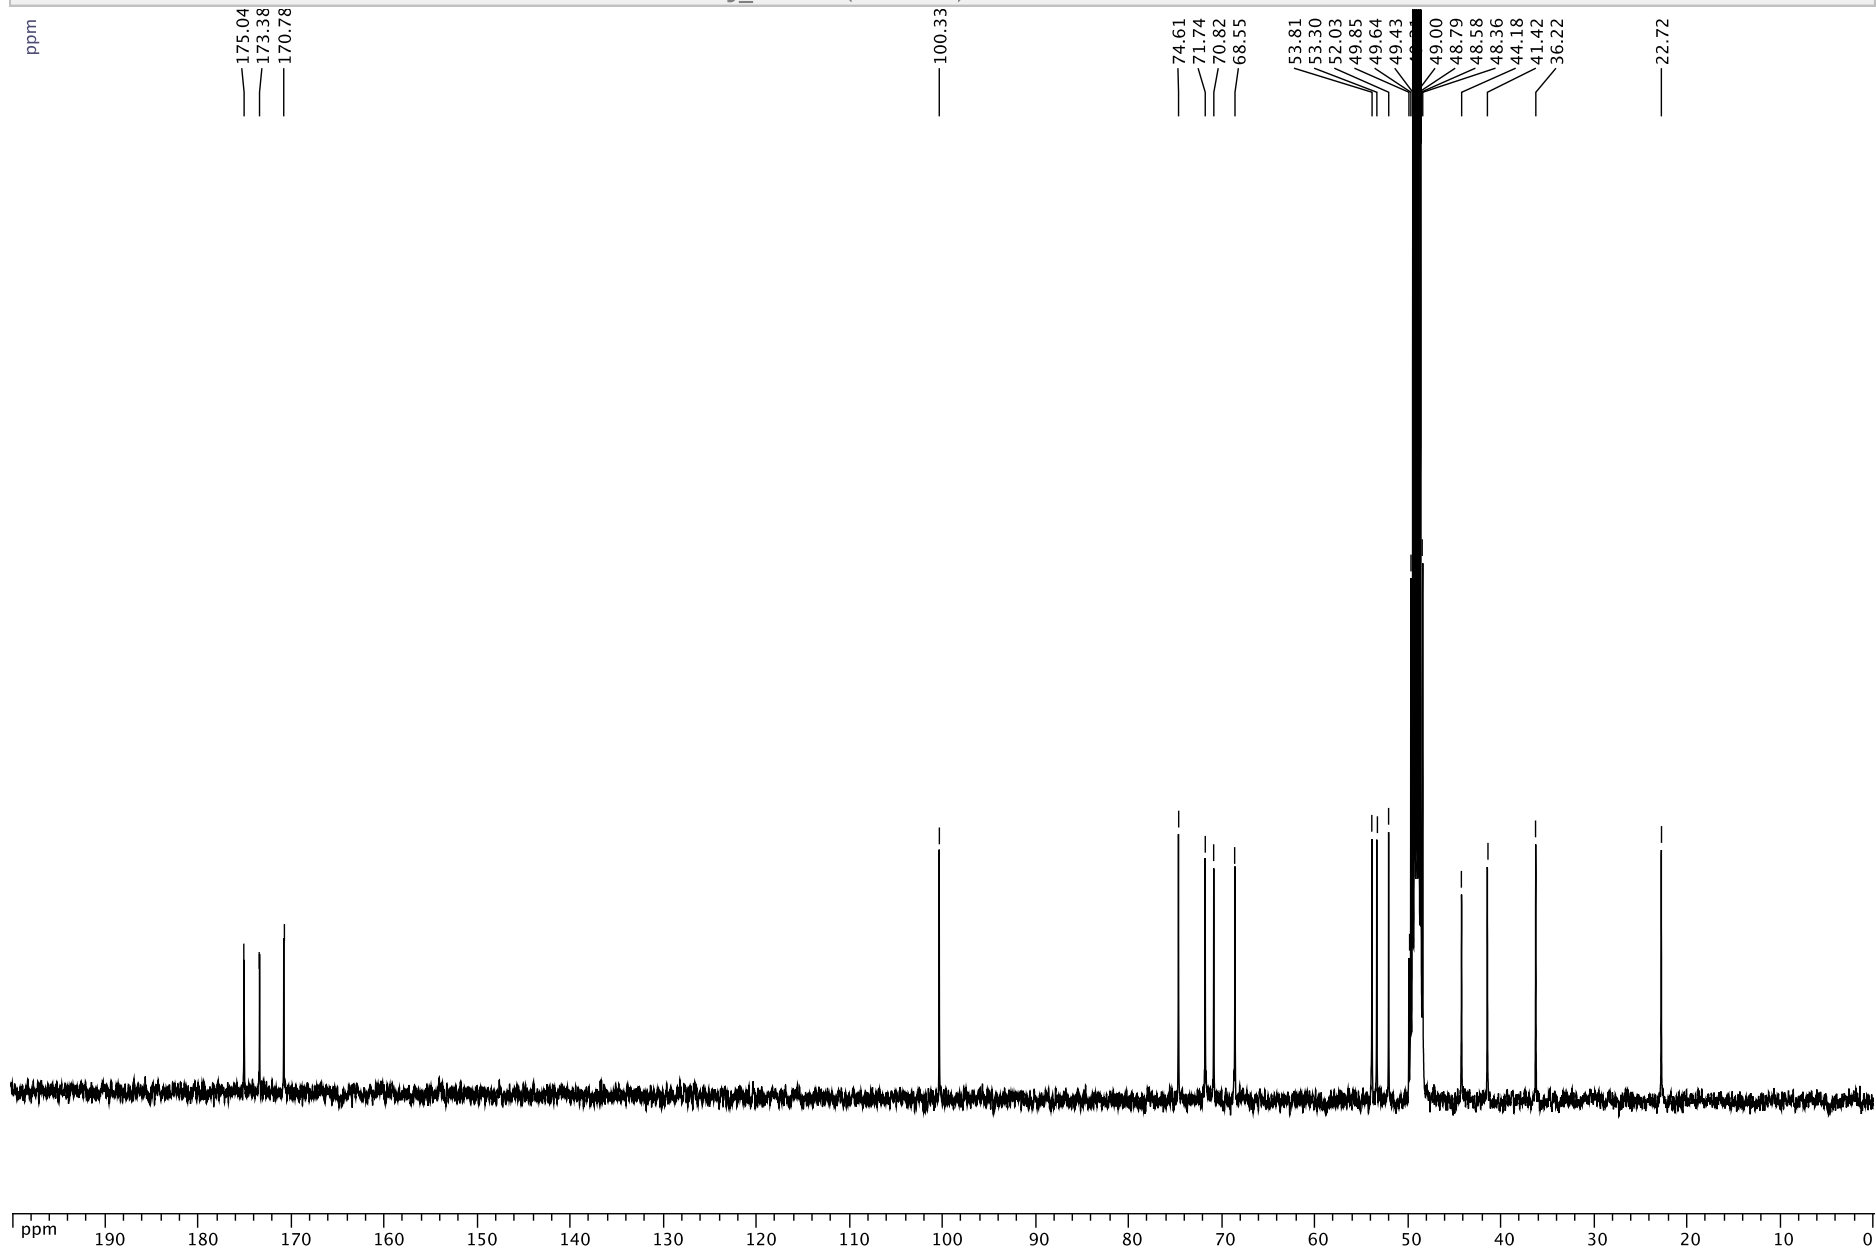

# Compound 26

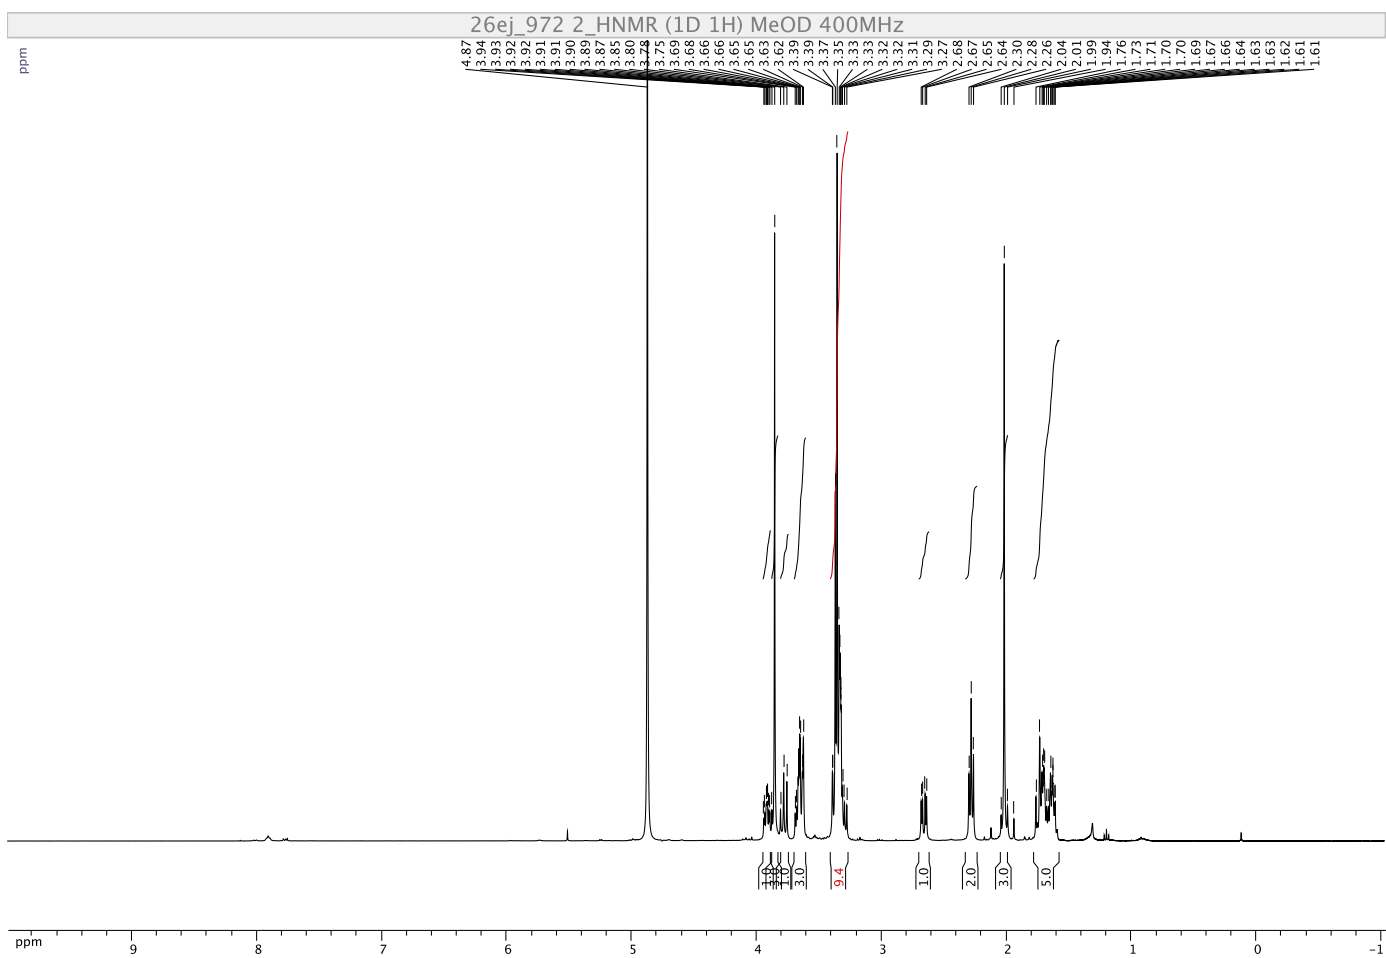

# Compound 26

26ej\_972 1\_CNMR (1D 13C) MeOD 400MHz

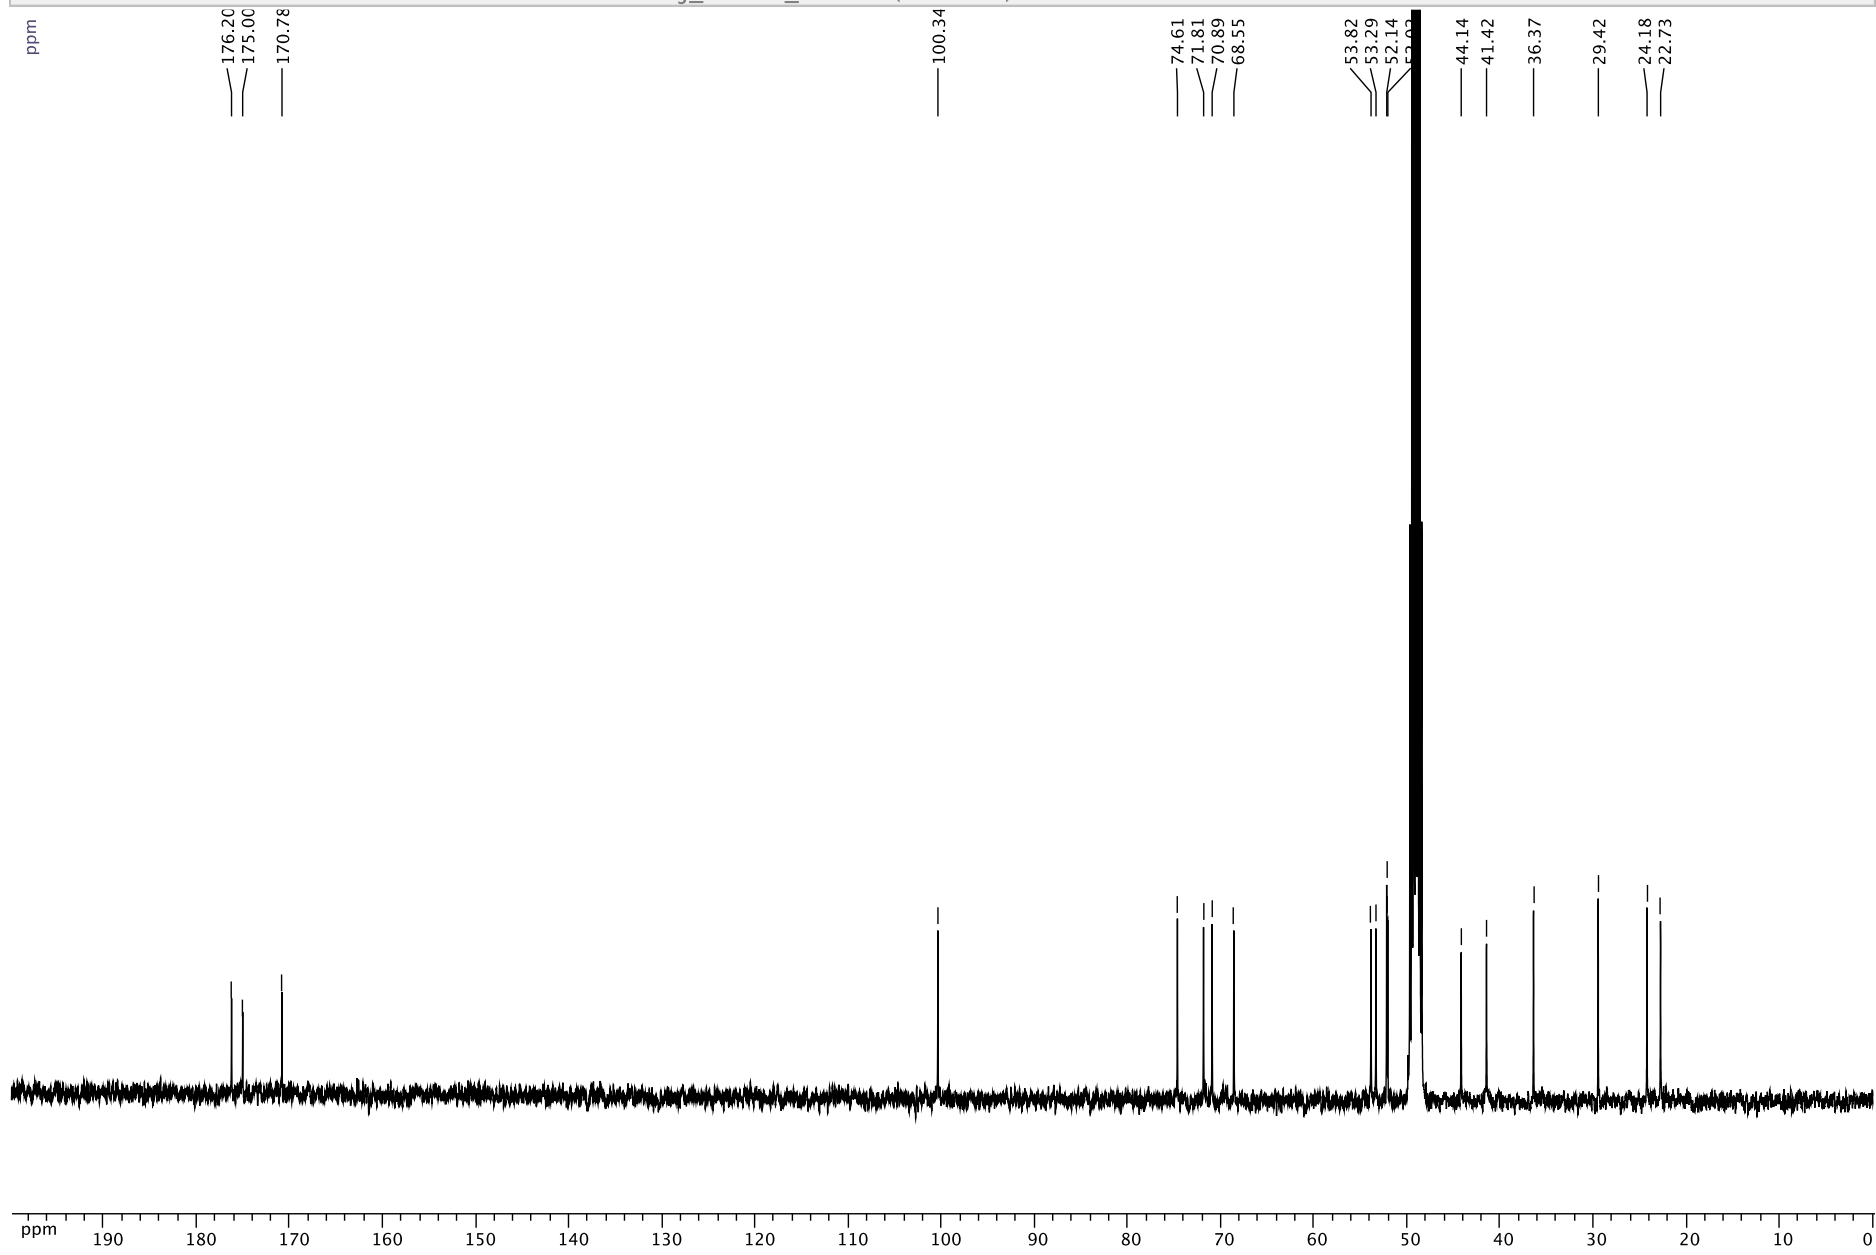

# Compound 27

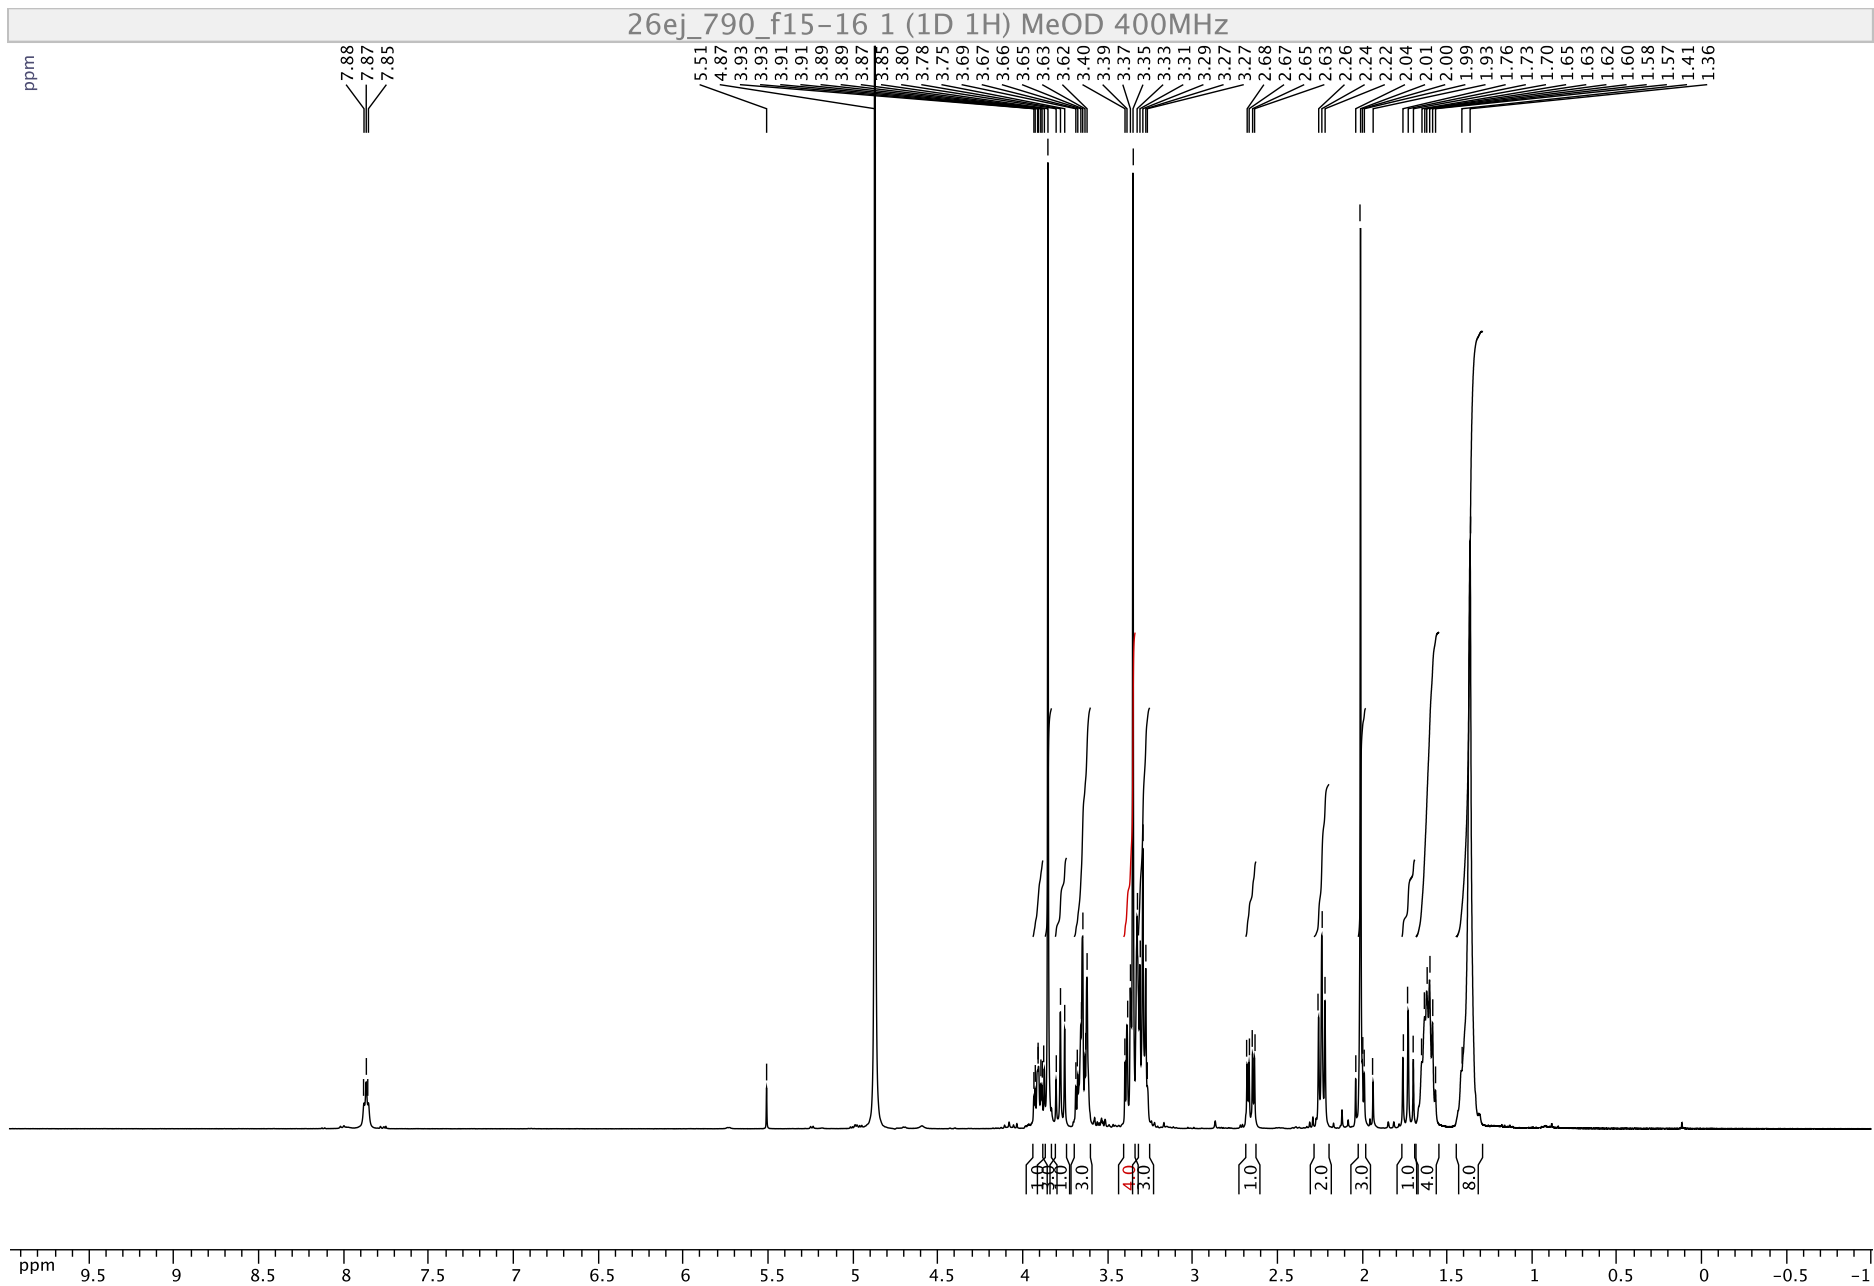

Compound 27

26ej\_794 5 (1D 13C) MeOD 400MHz

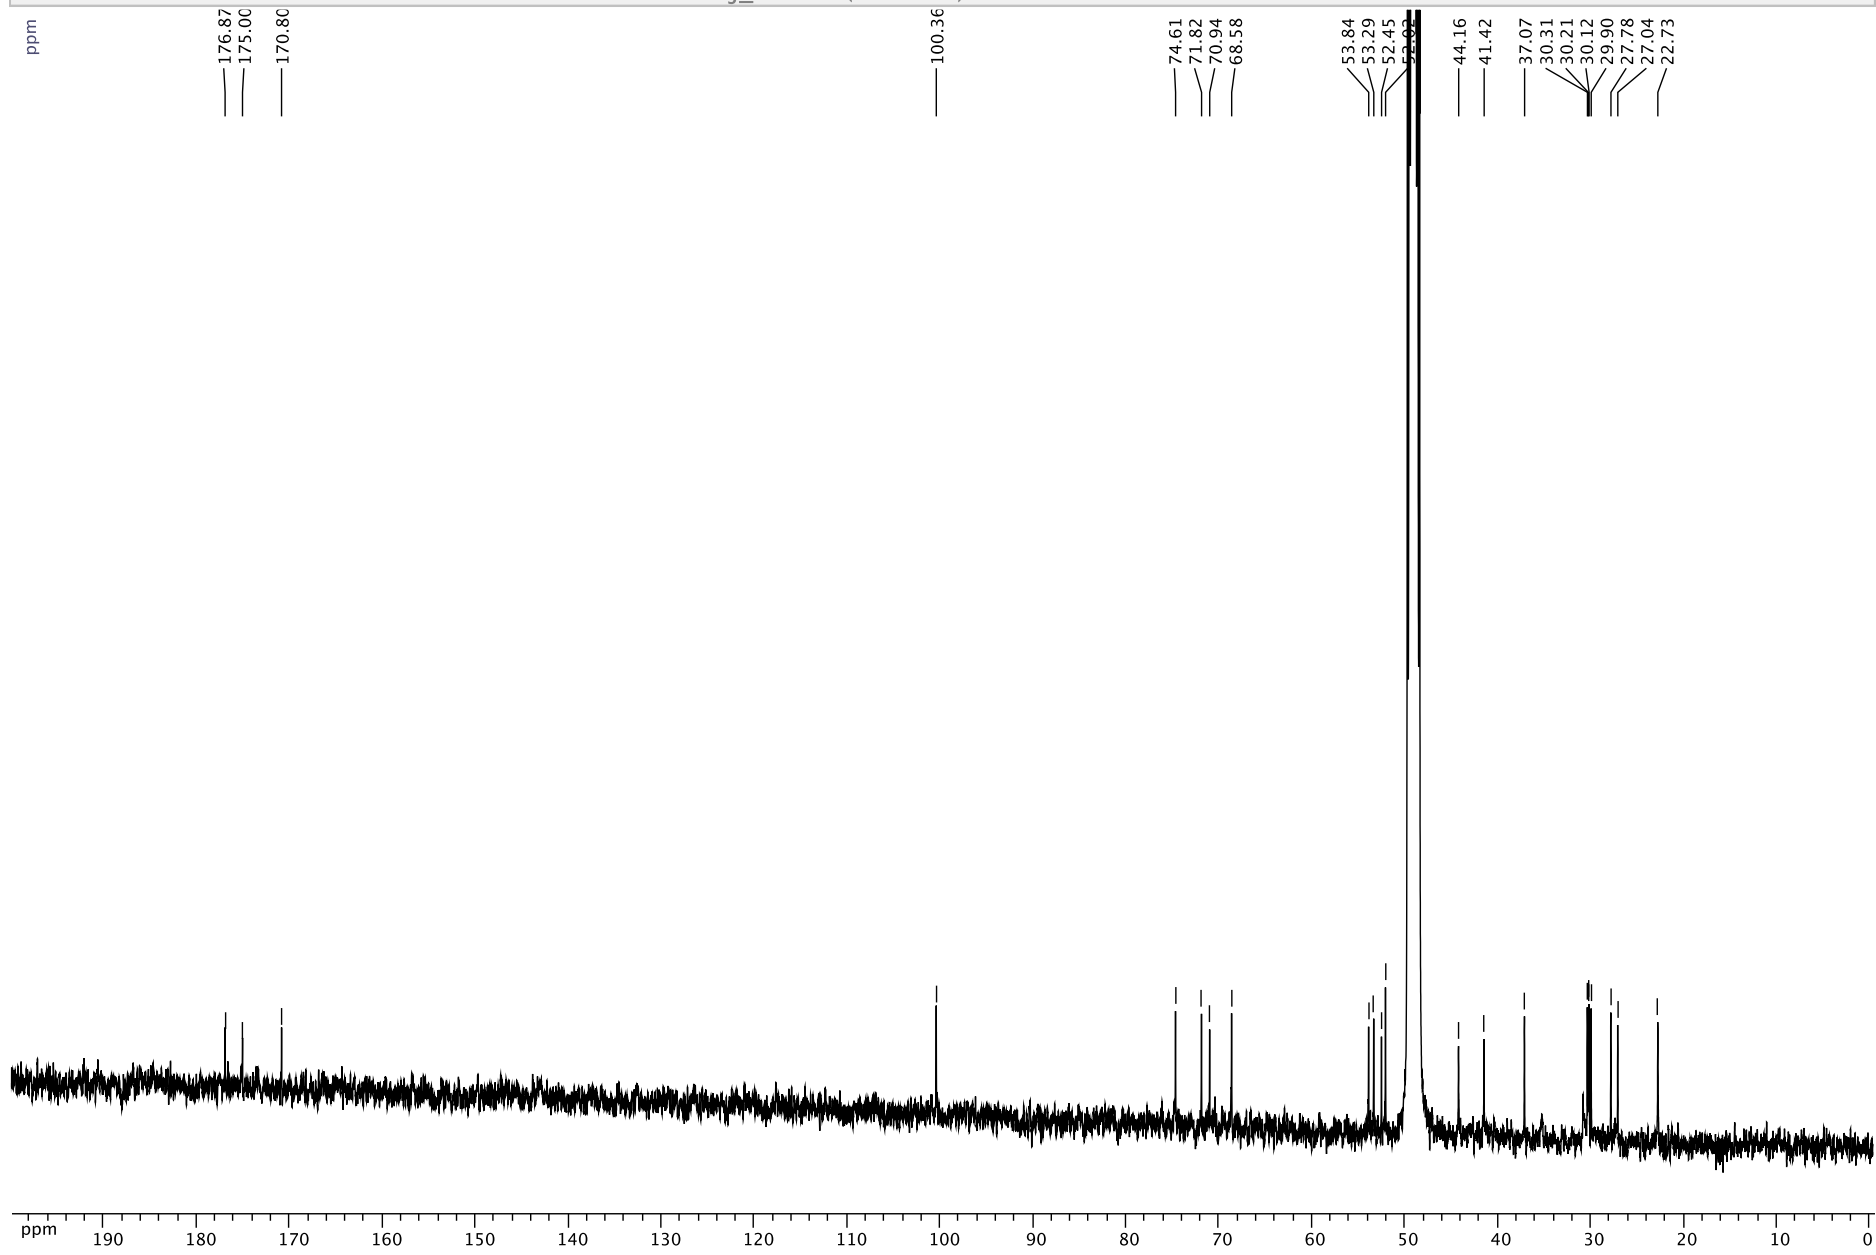

Compound 29

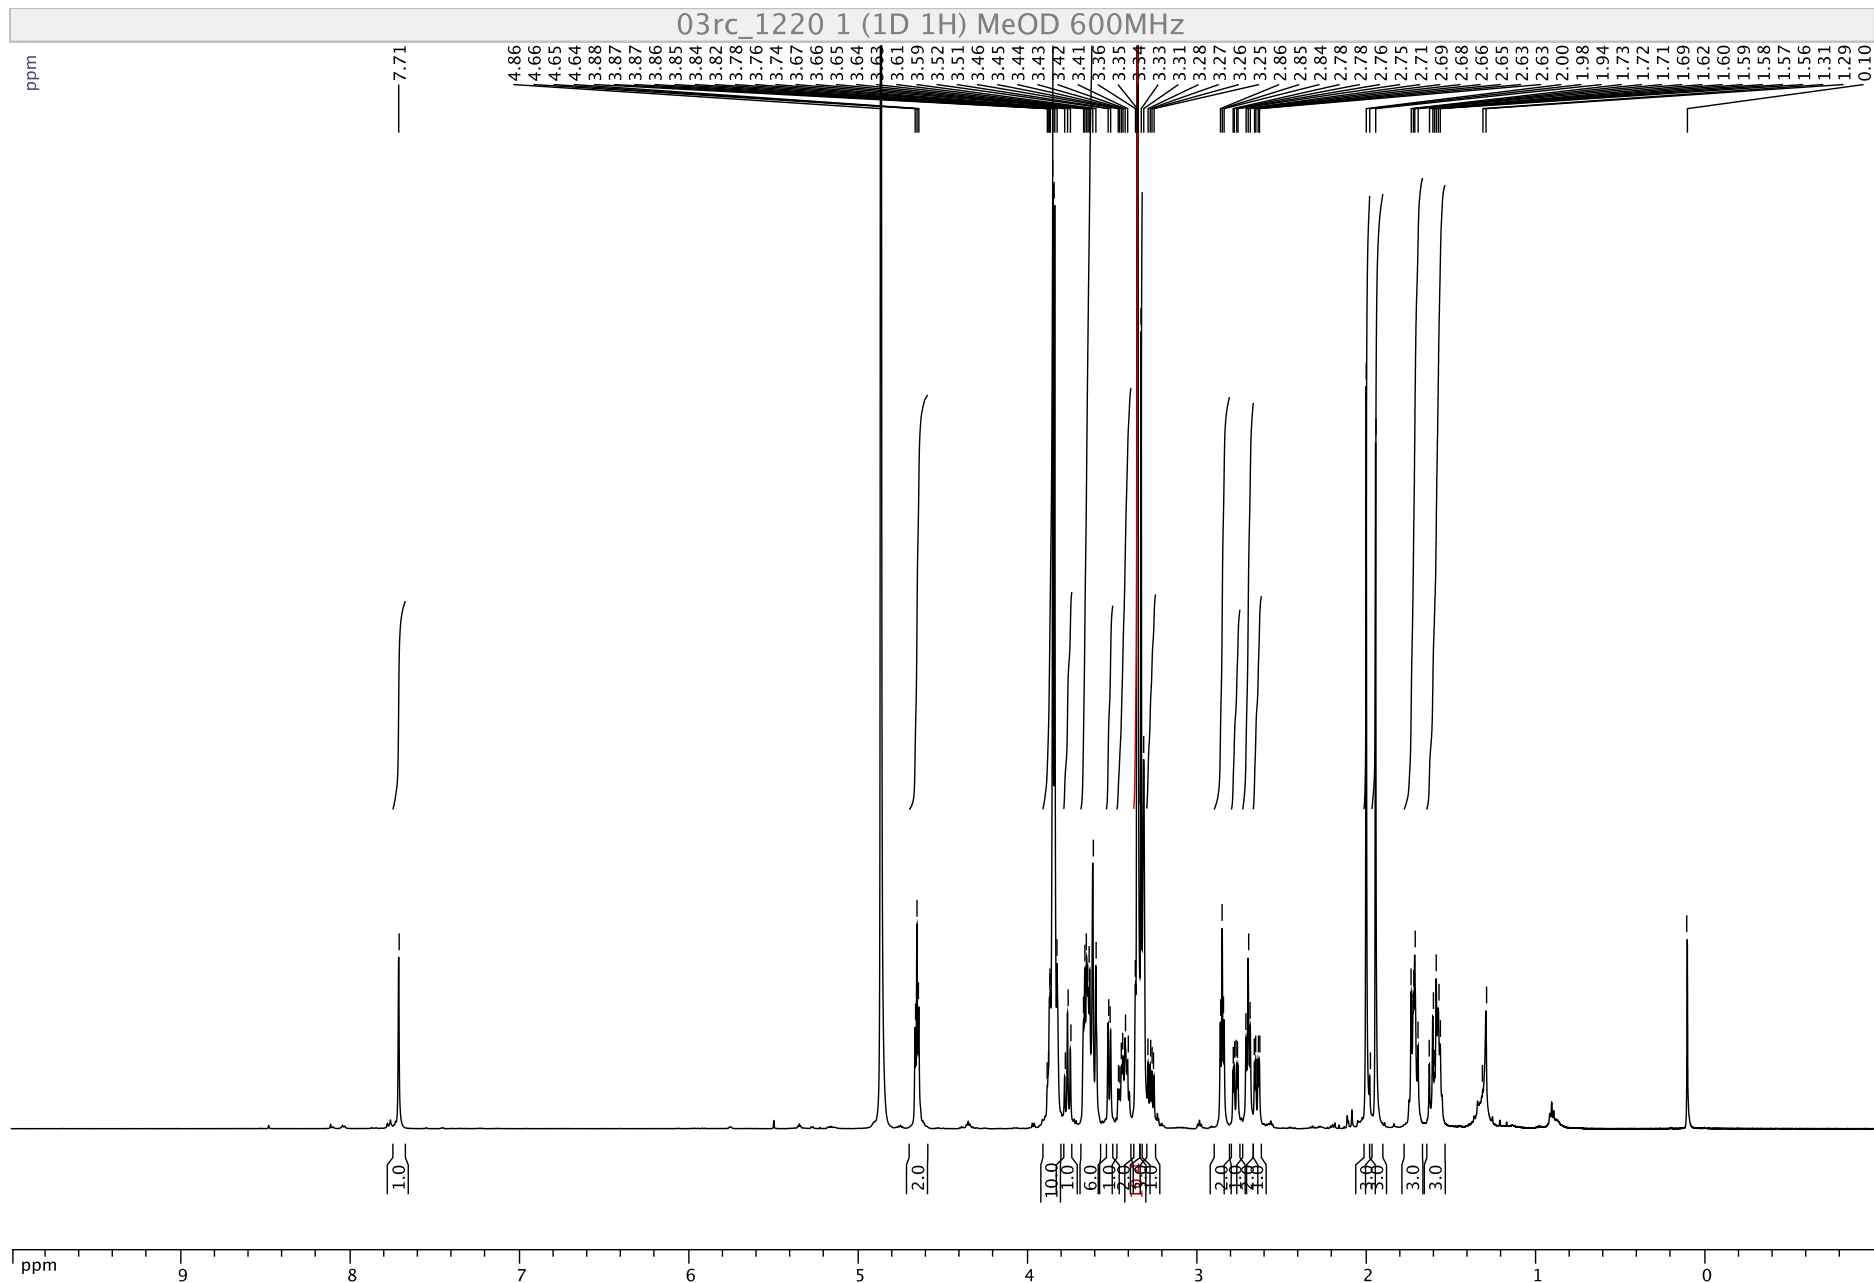

# Compound 29

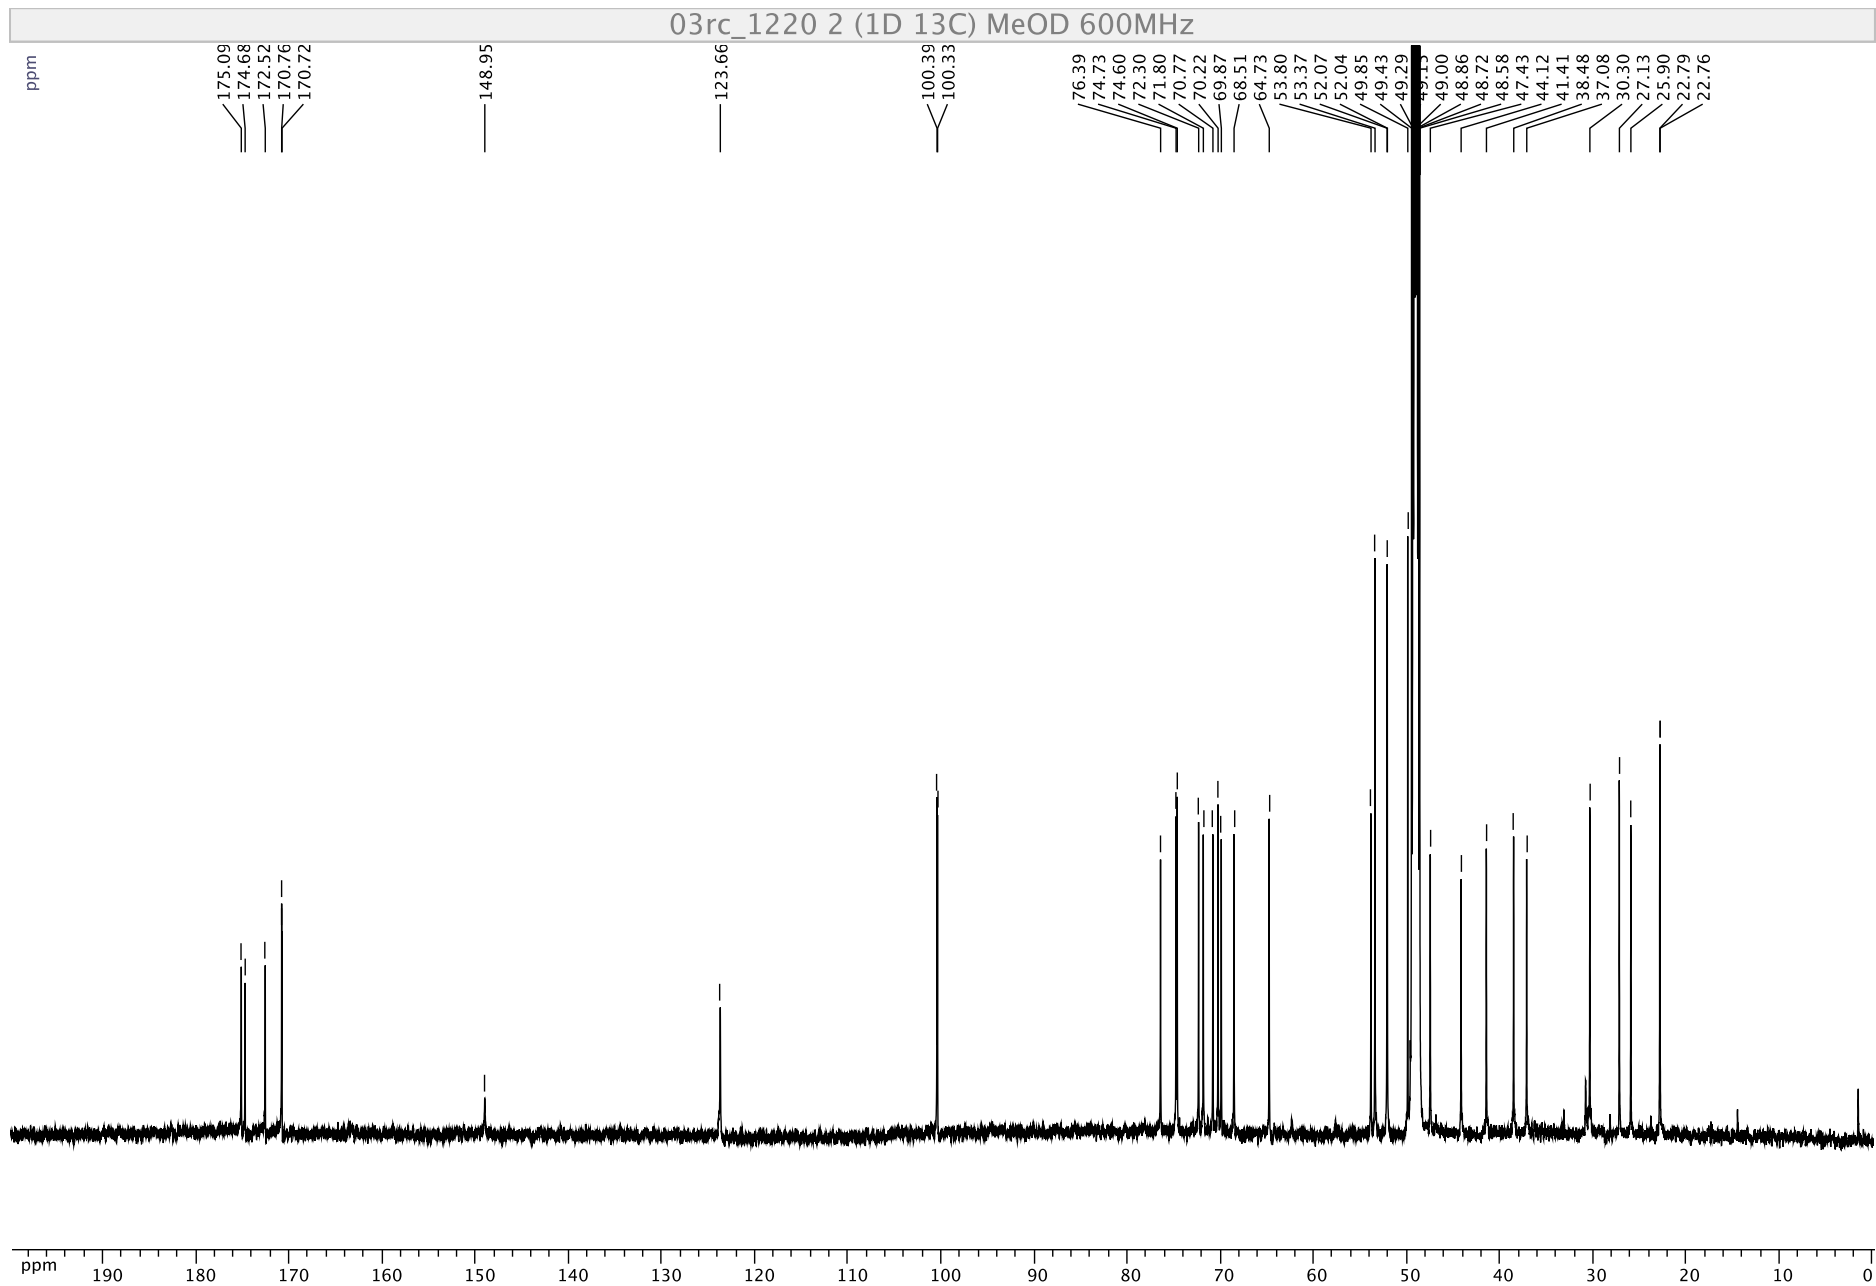

Compound 30

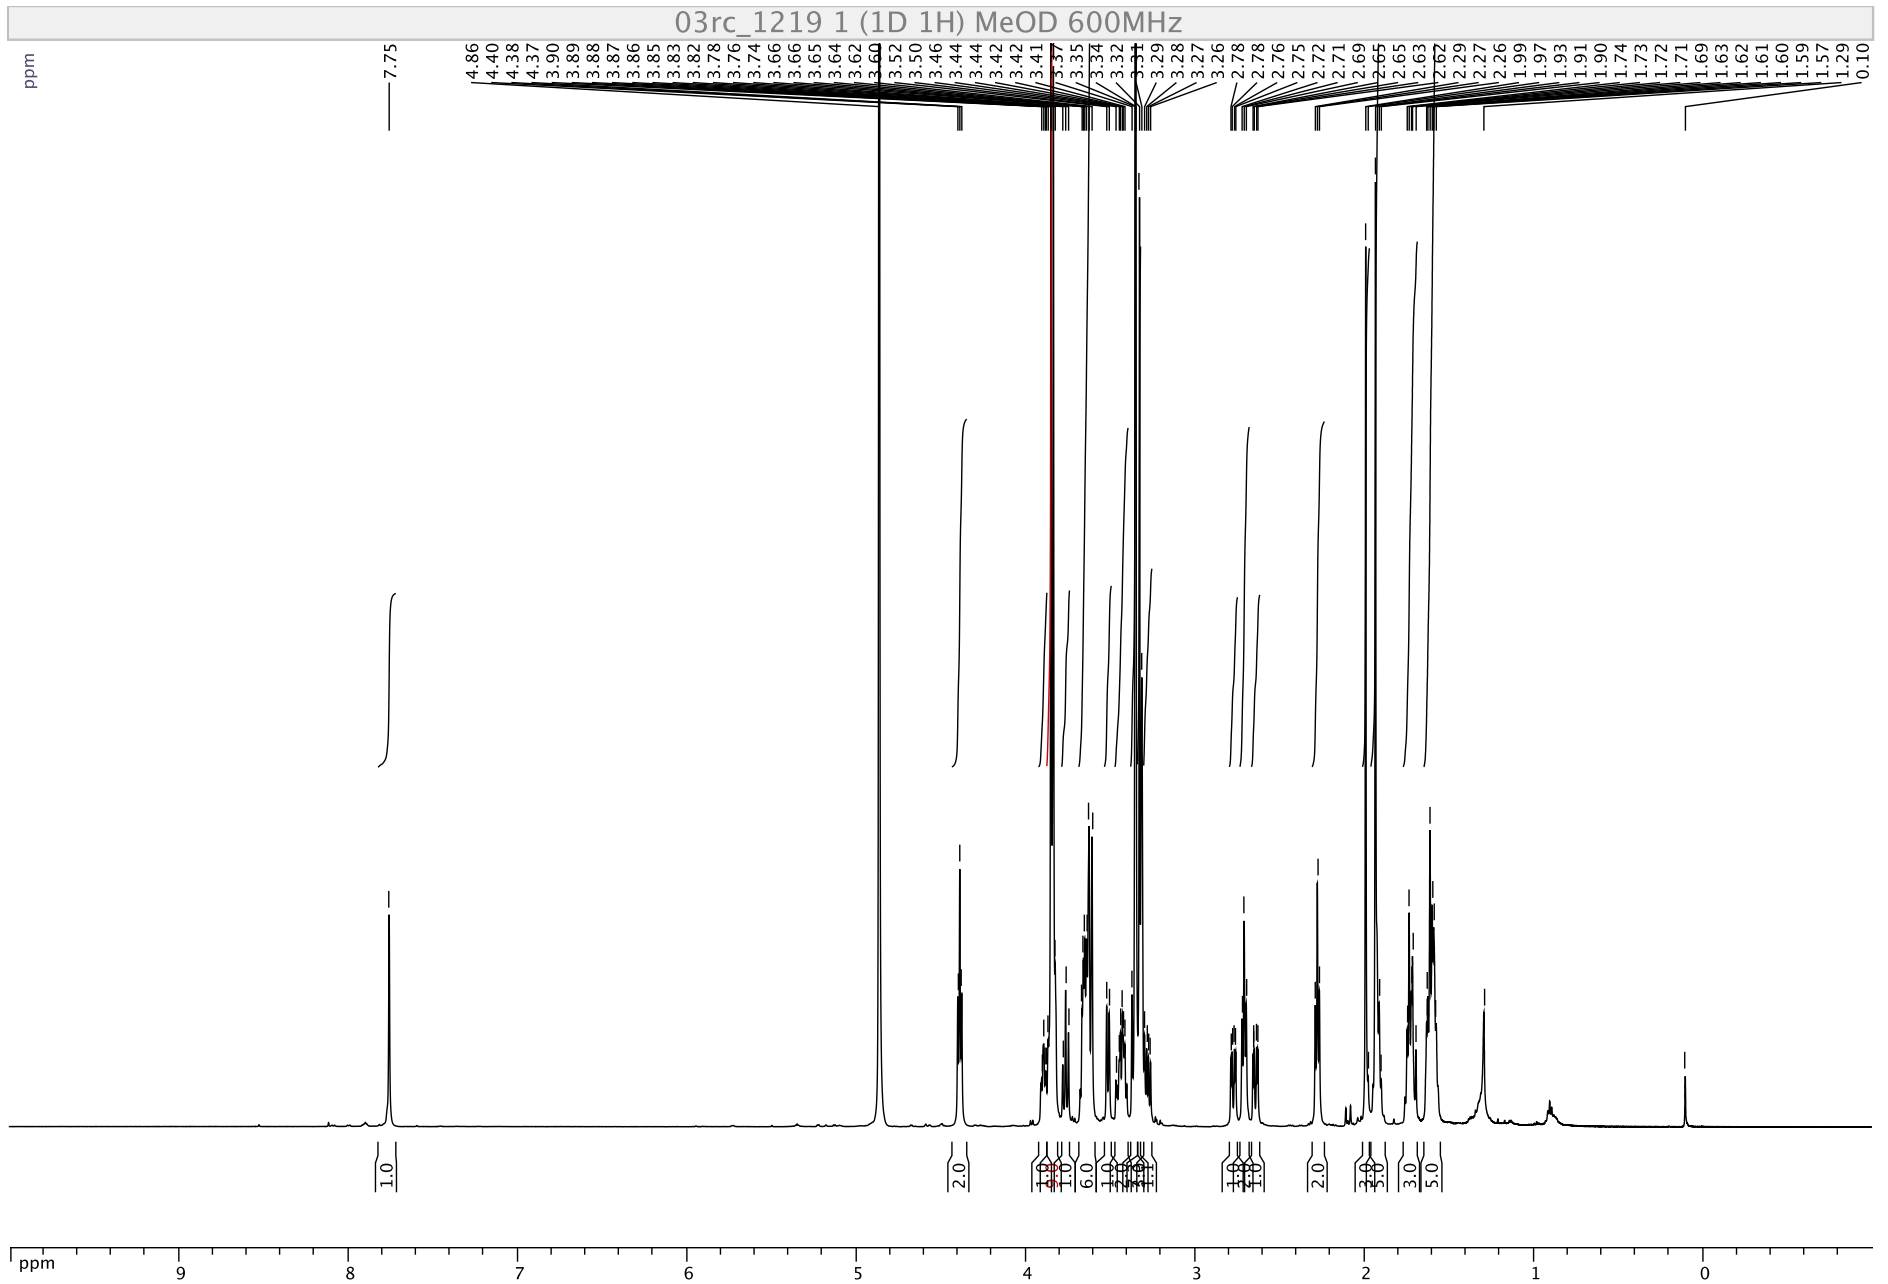



Compound 30

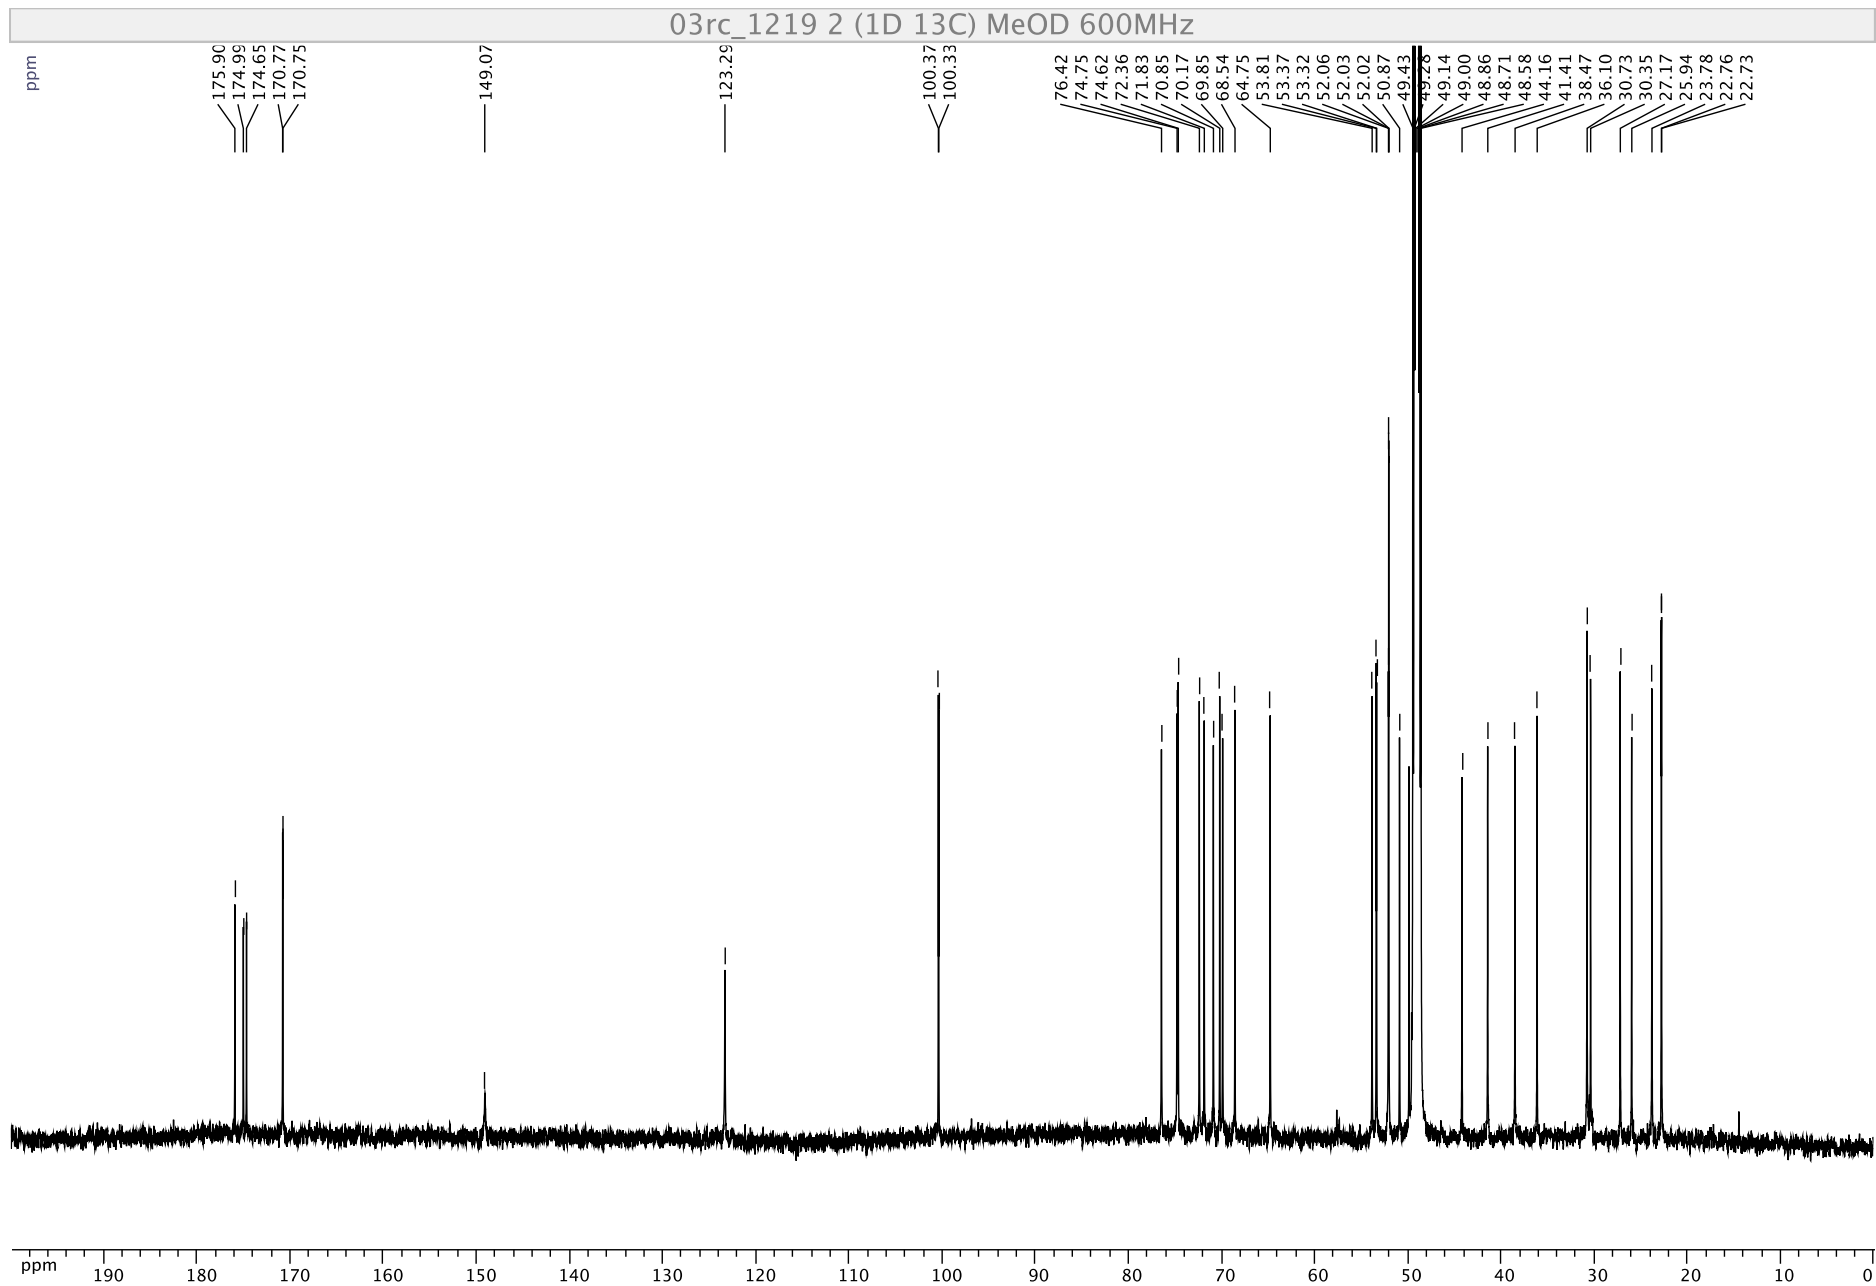

Compound 31

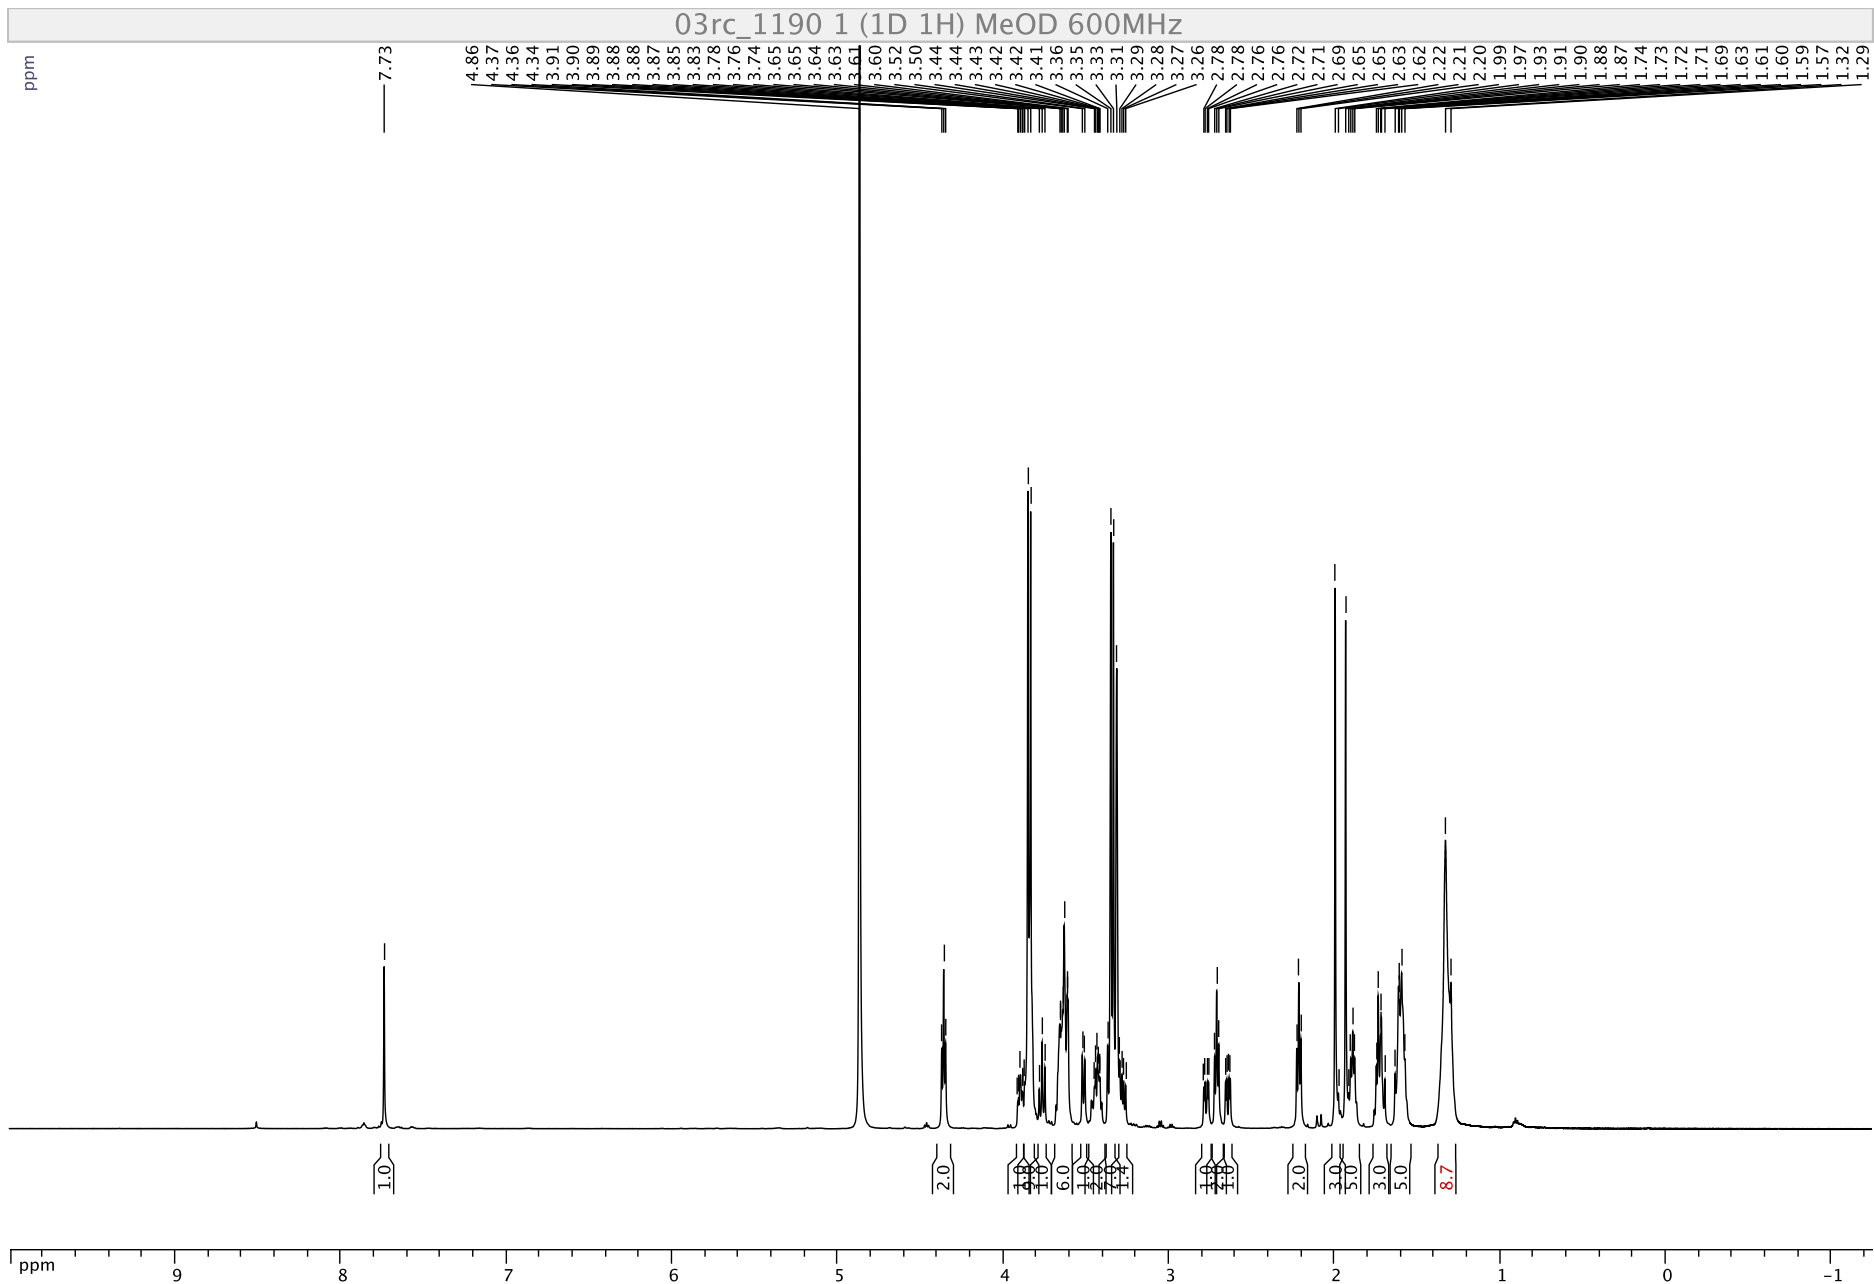

Compound 31

03rc\_1190 2 (1D 13C) MeOD 600MHz

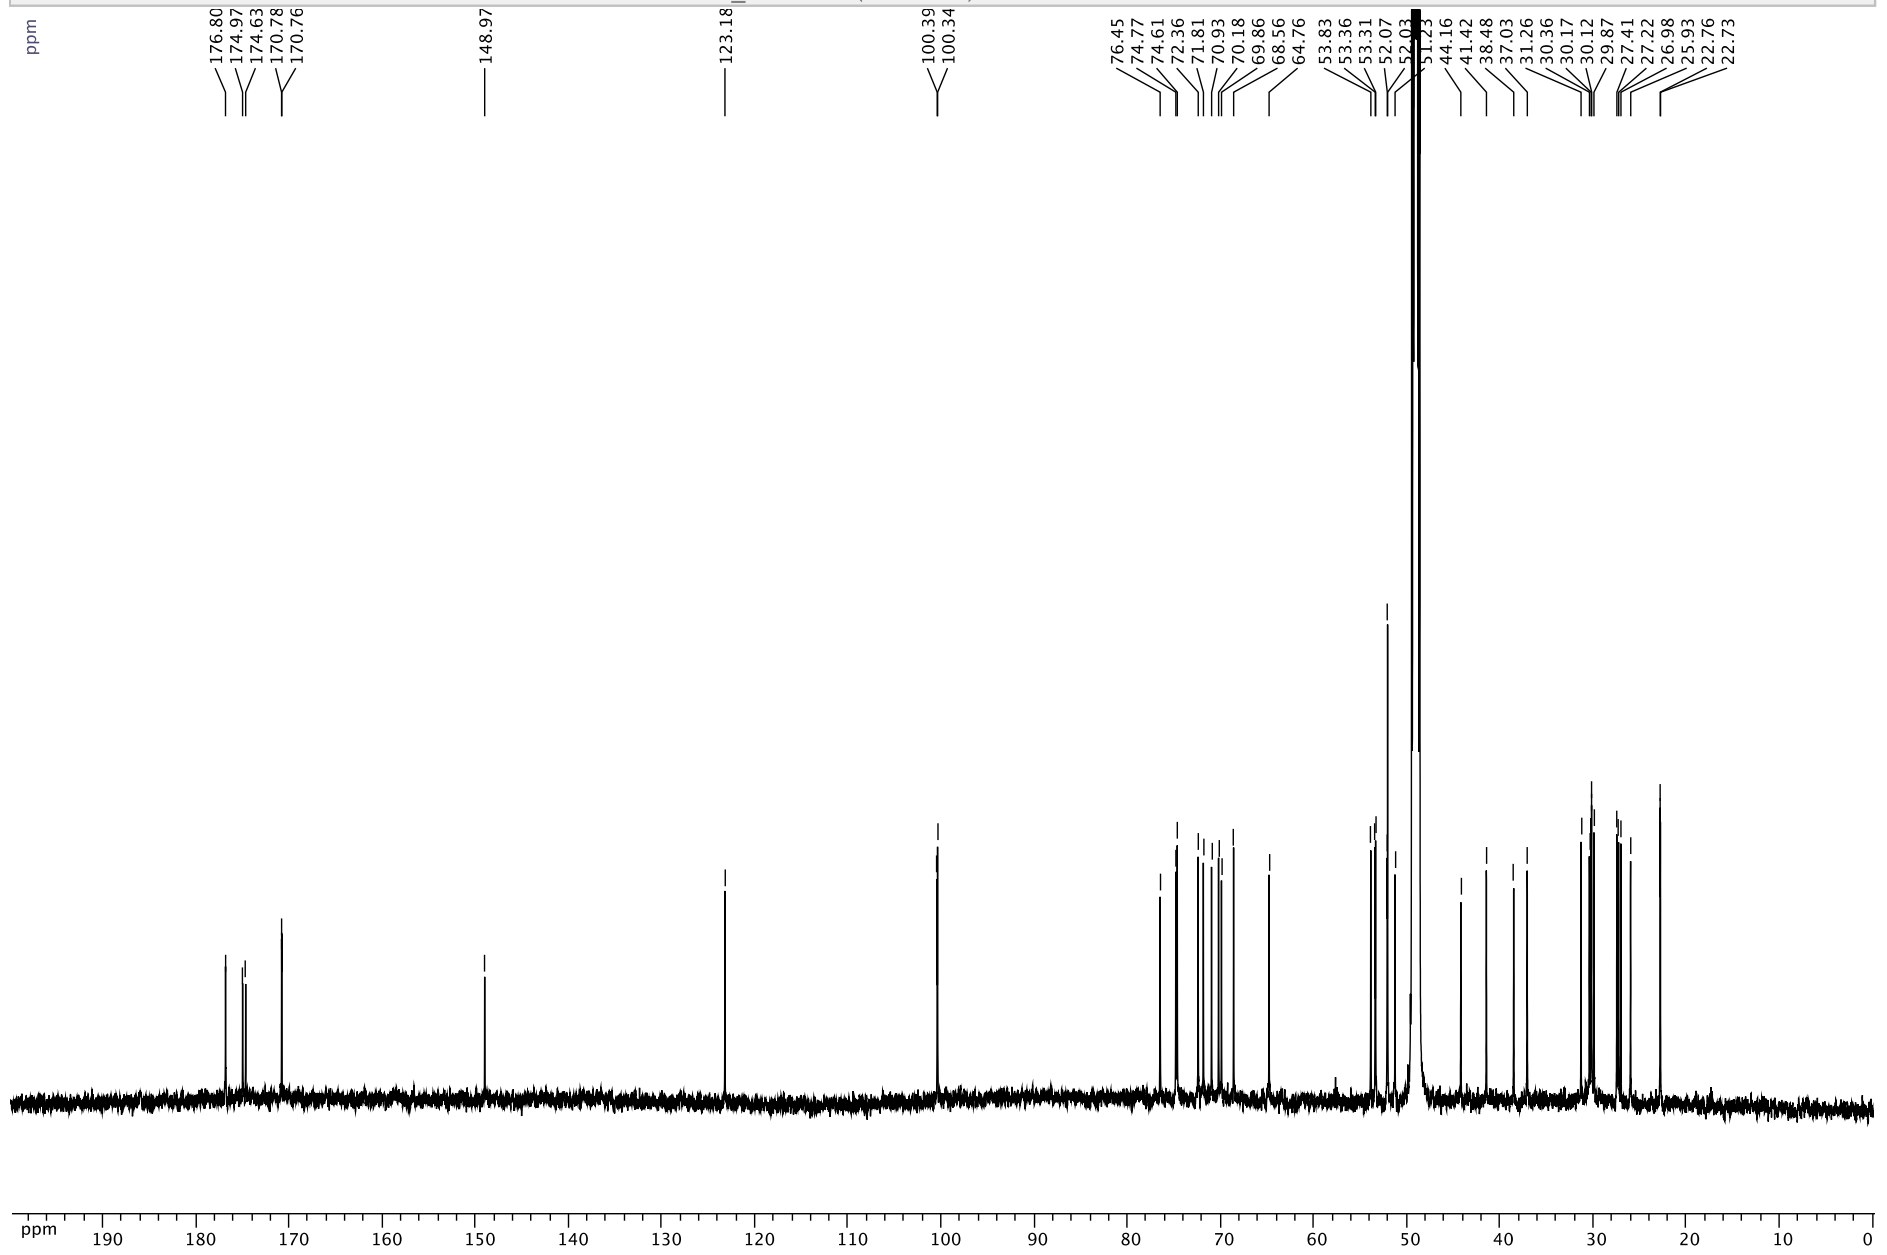

Compound 32 (ME1147)

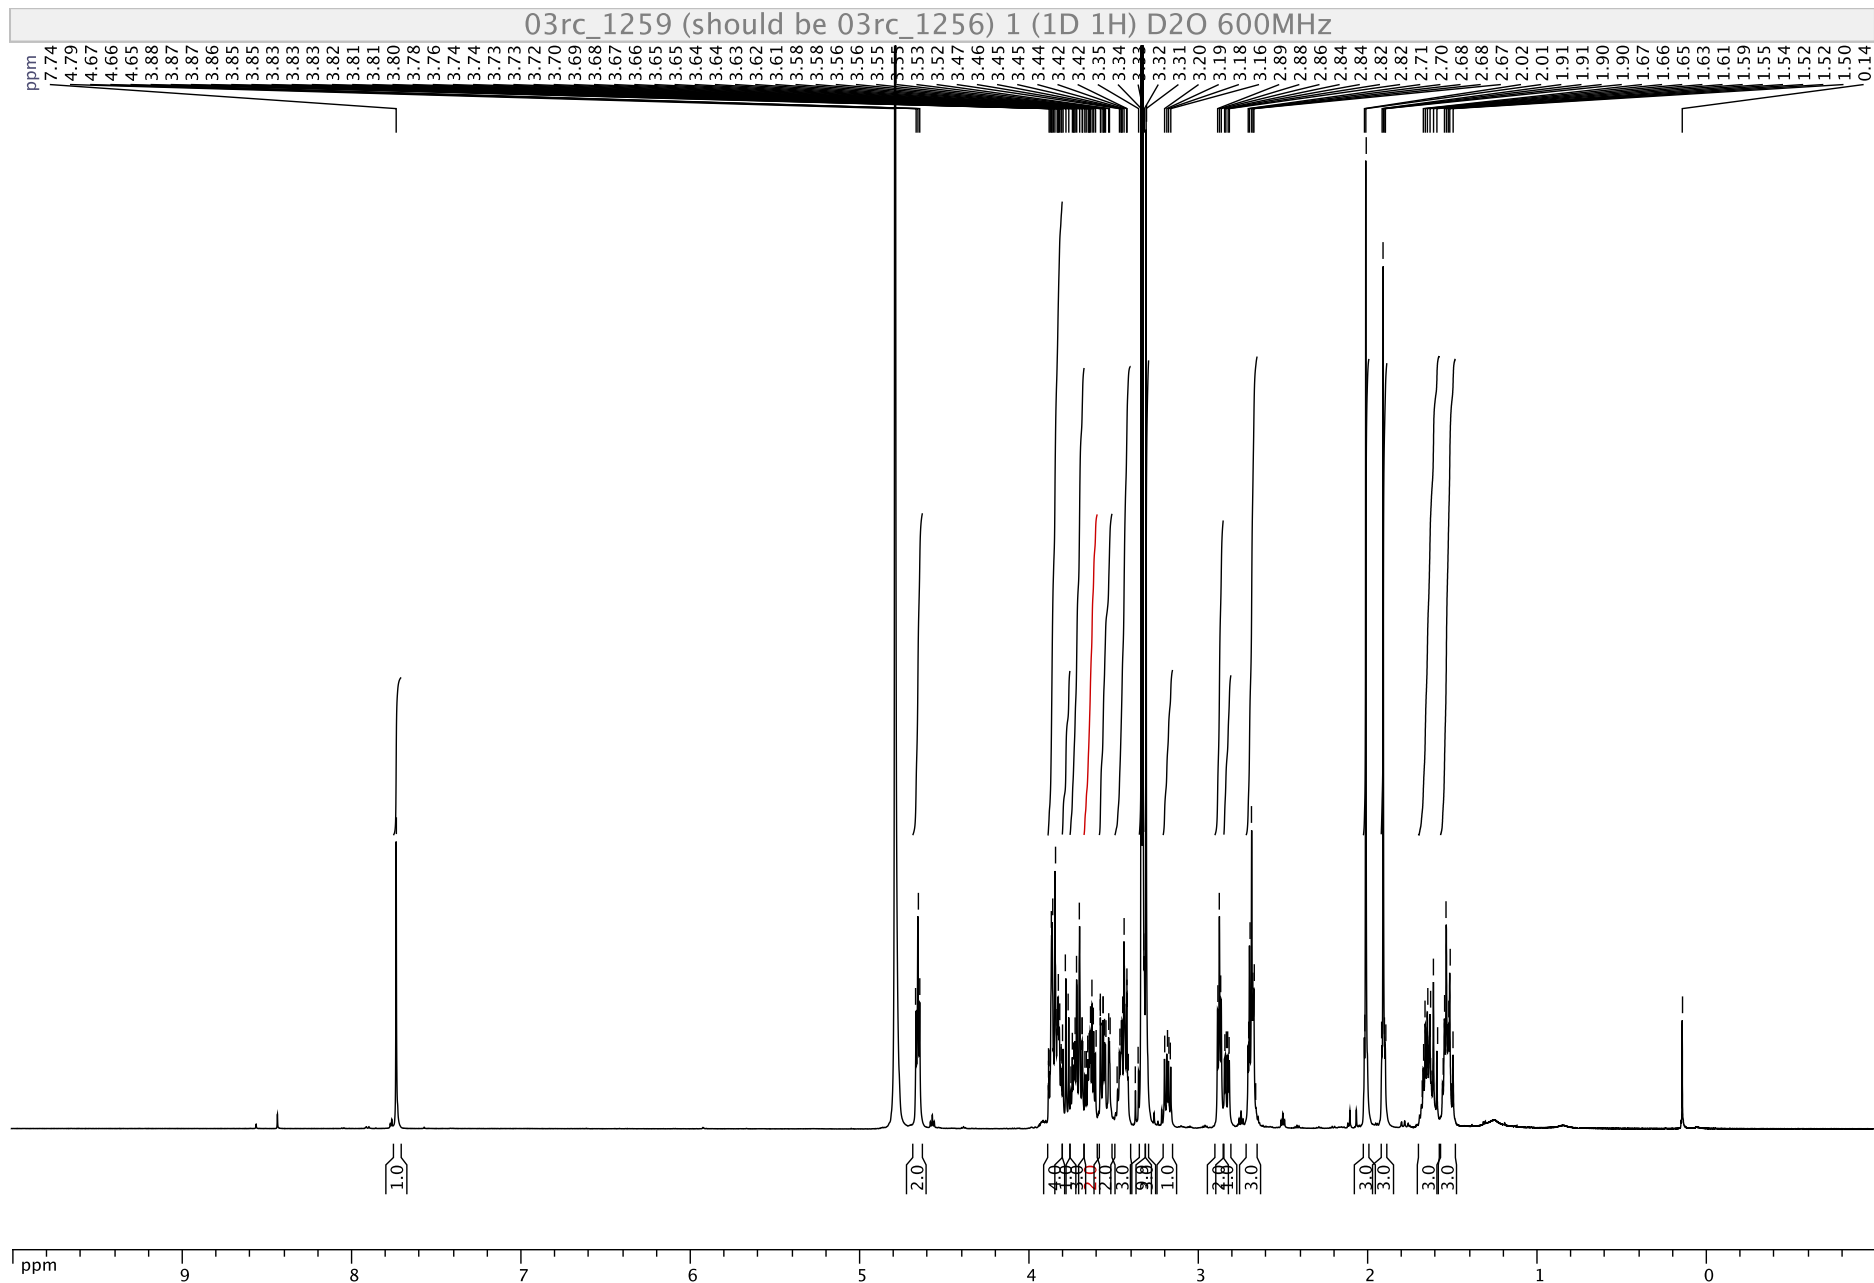

# Compound 32 (ME1147)

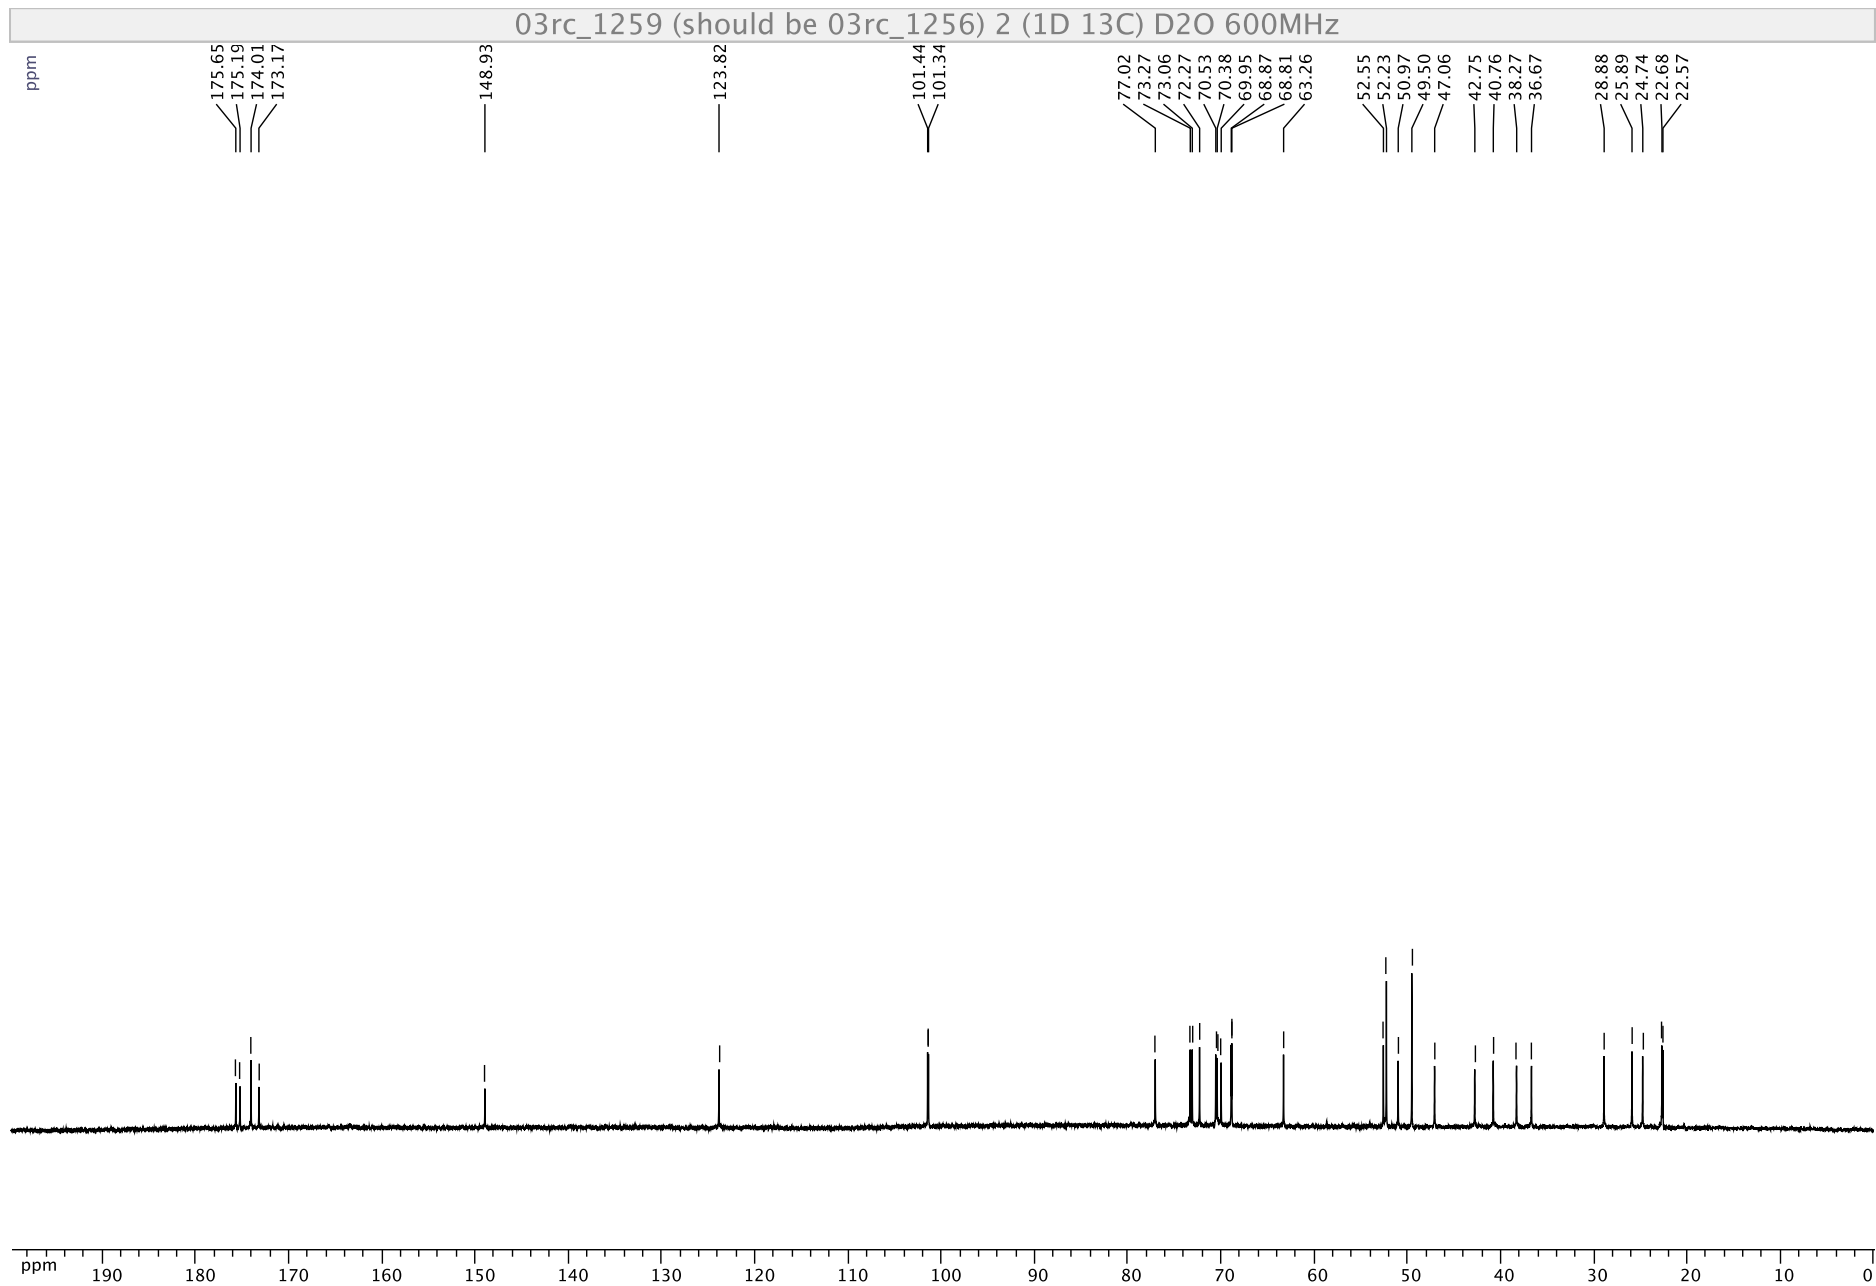

Compound 33 (ME1148)

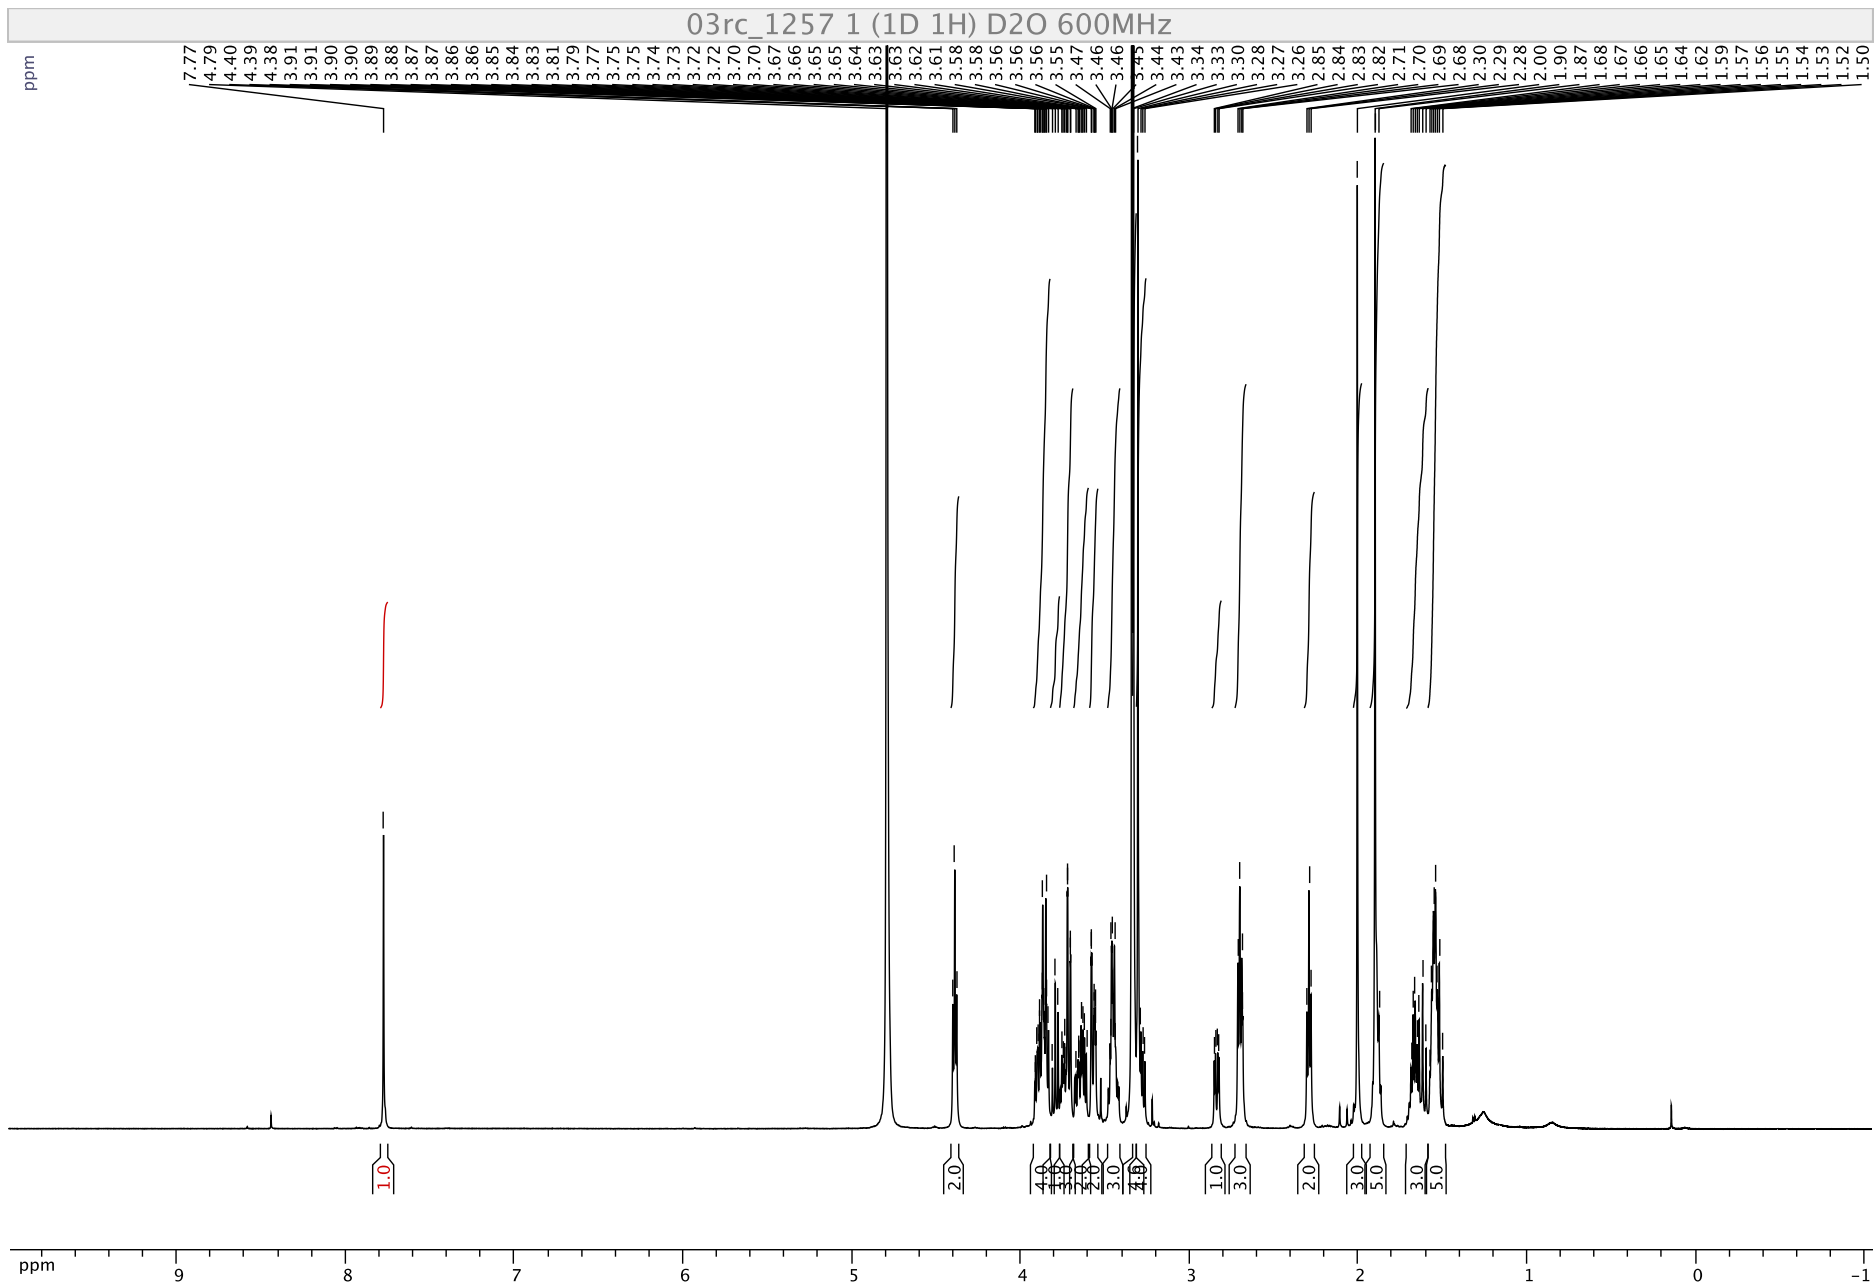

# Compound 33 (ME1148)

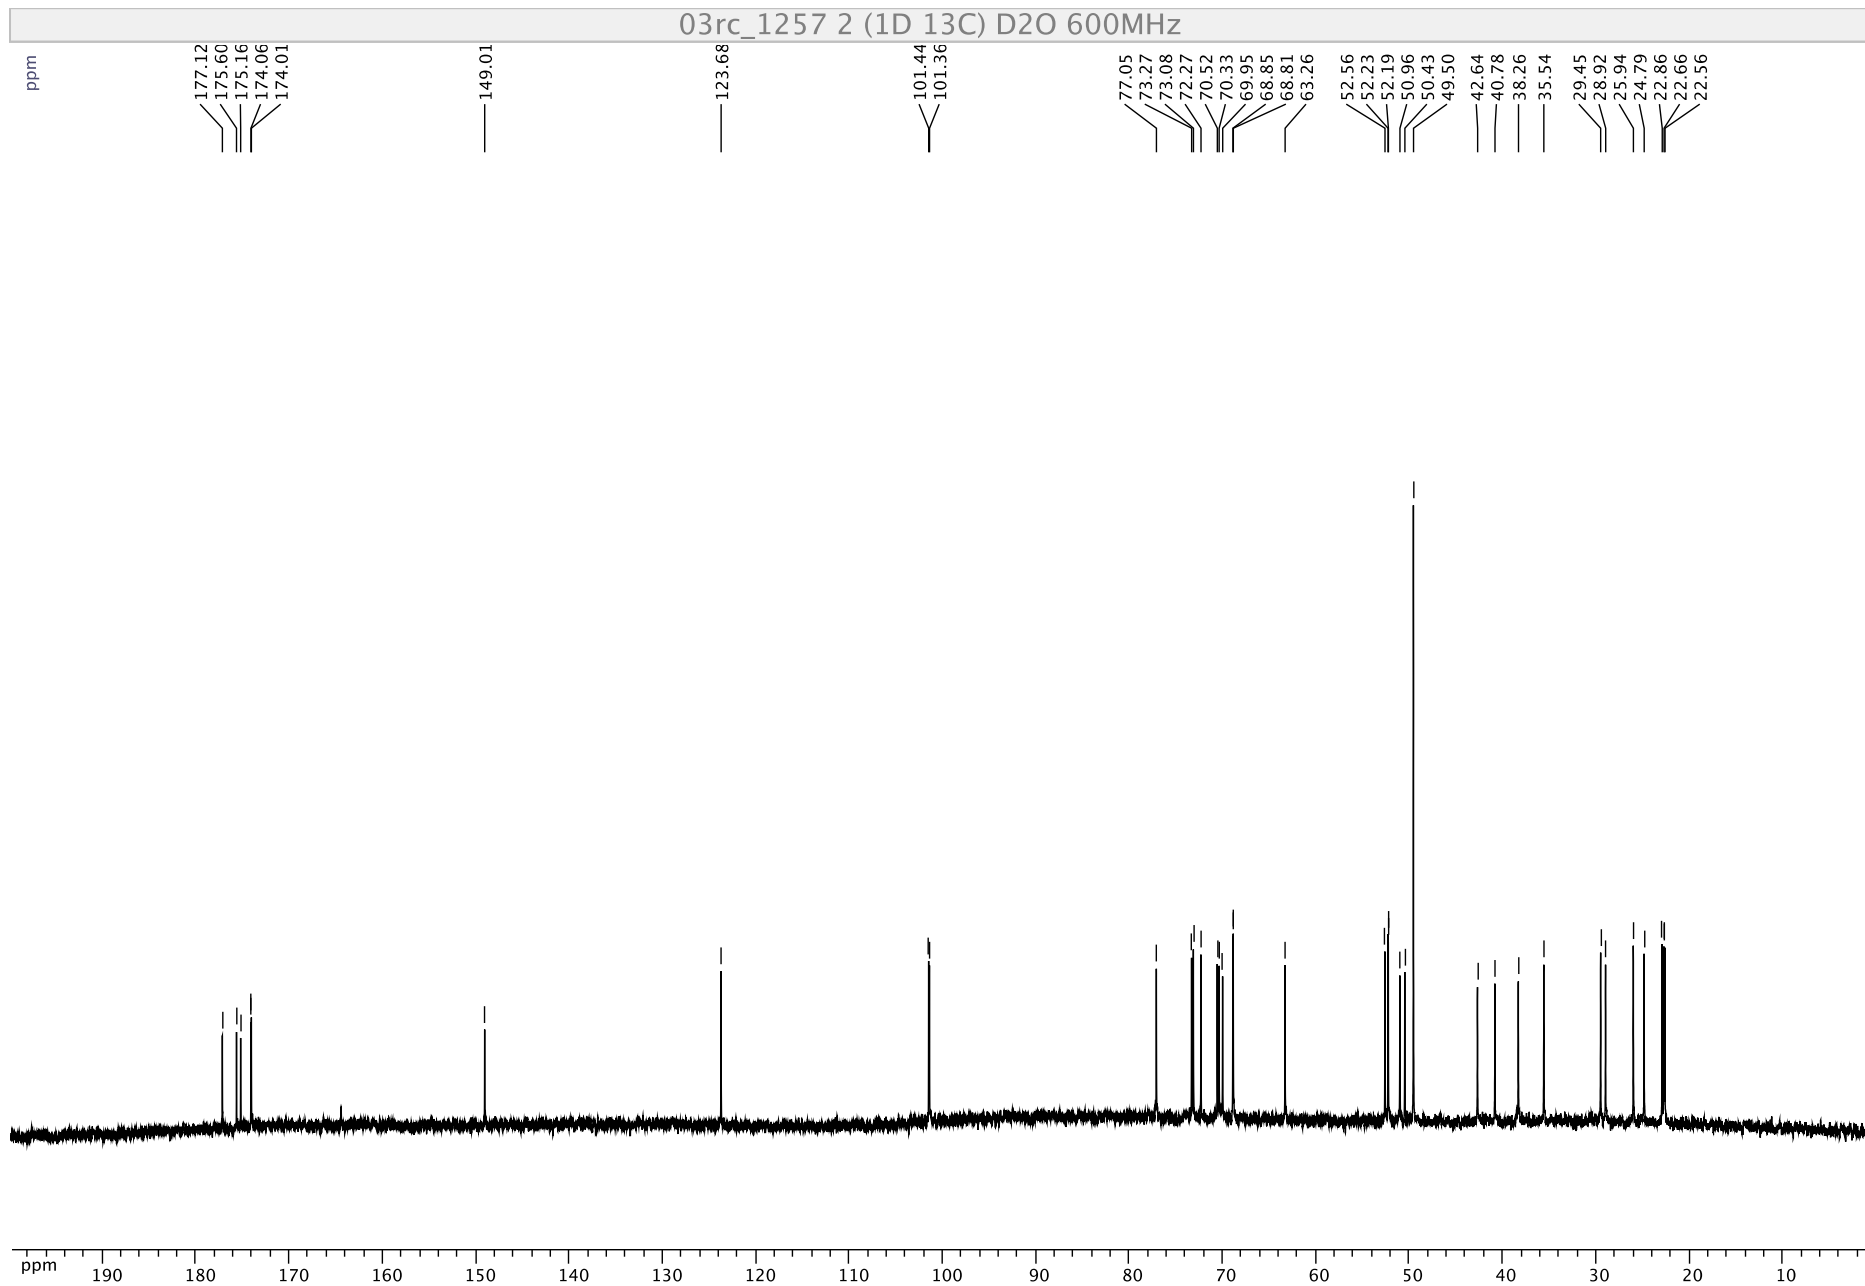

Compound 34 (ME1149)

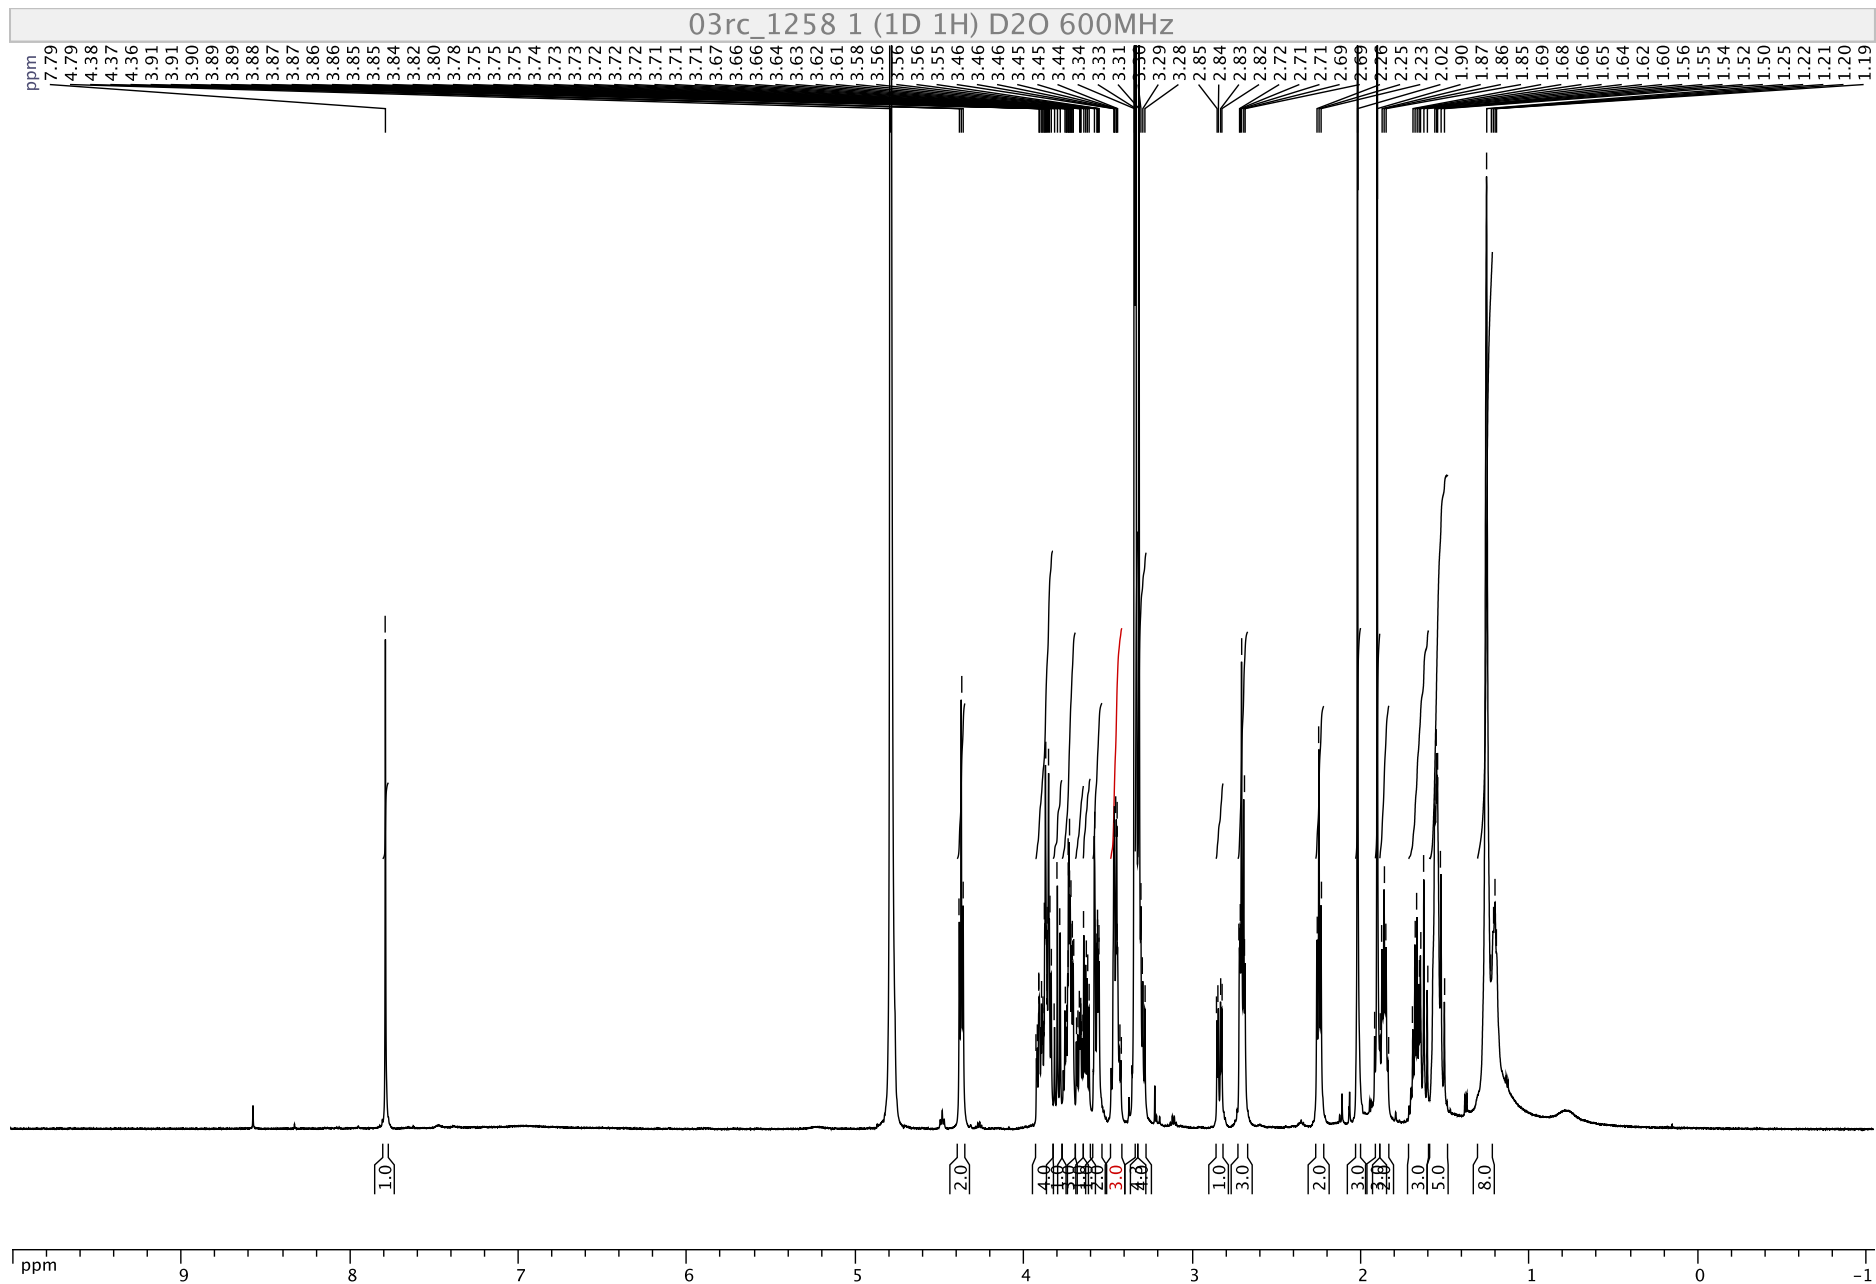



# Compound 34 (ME1149)

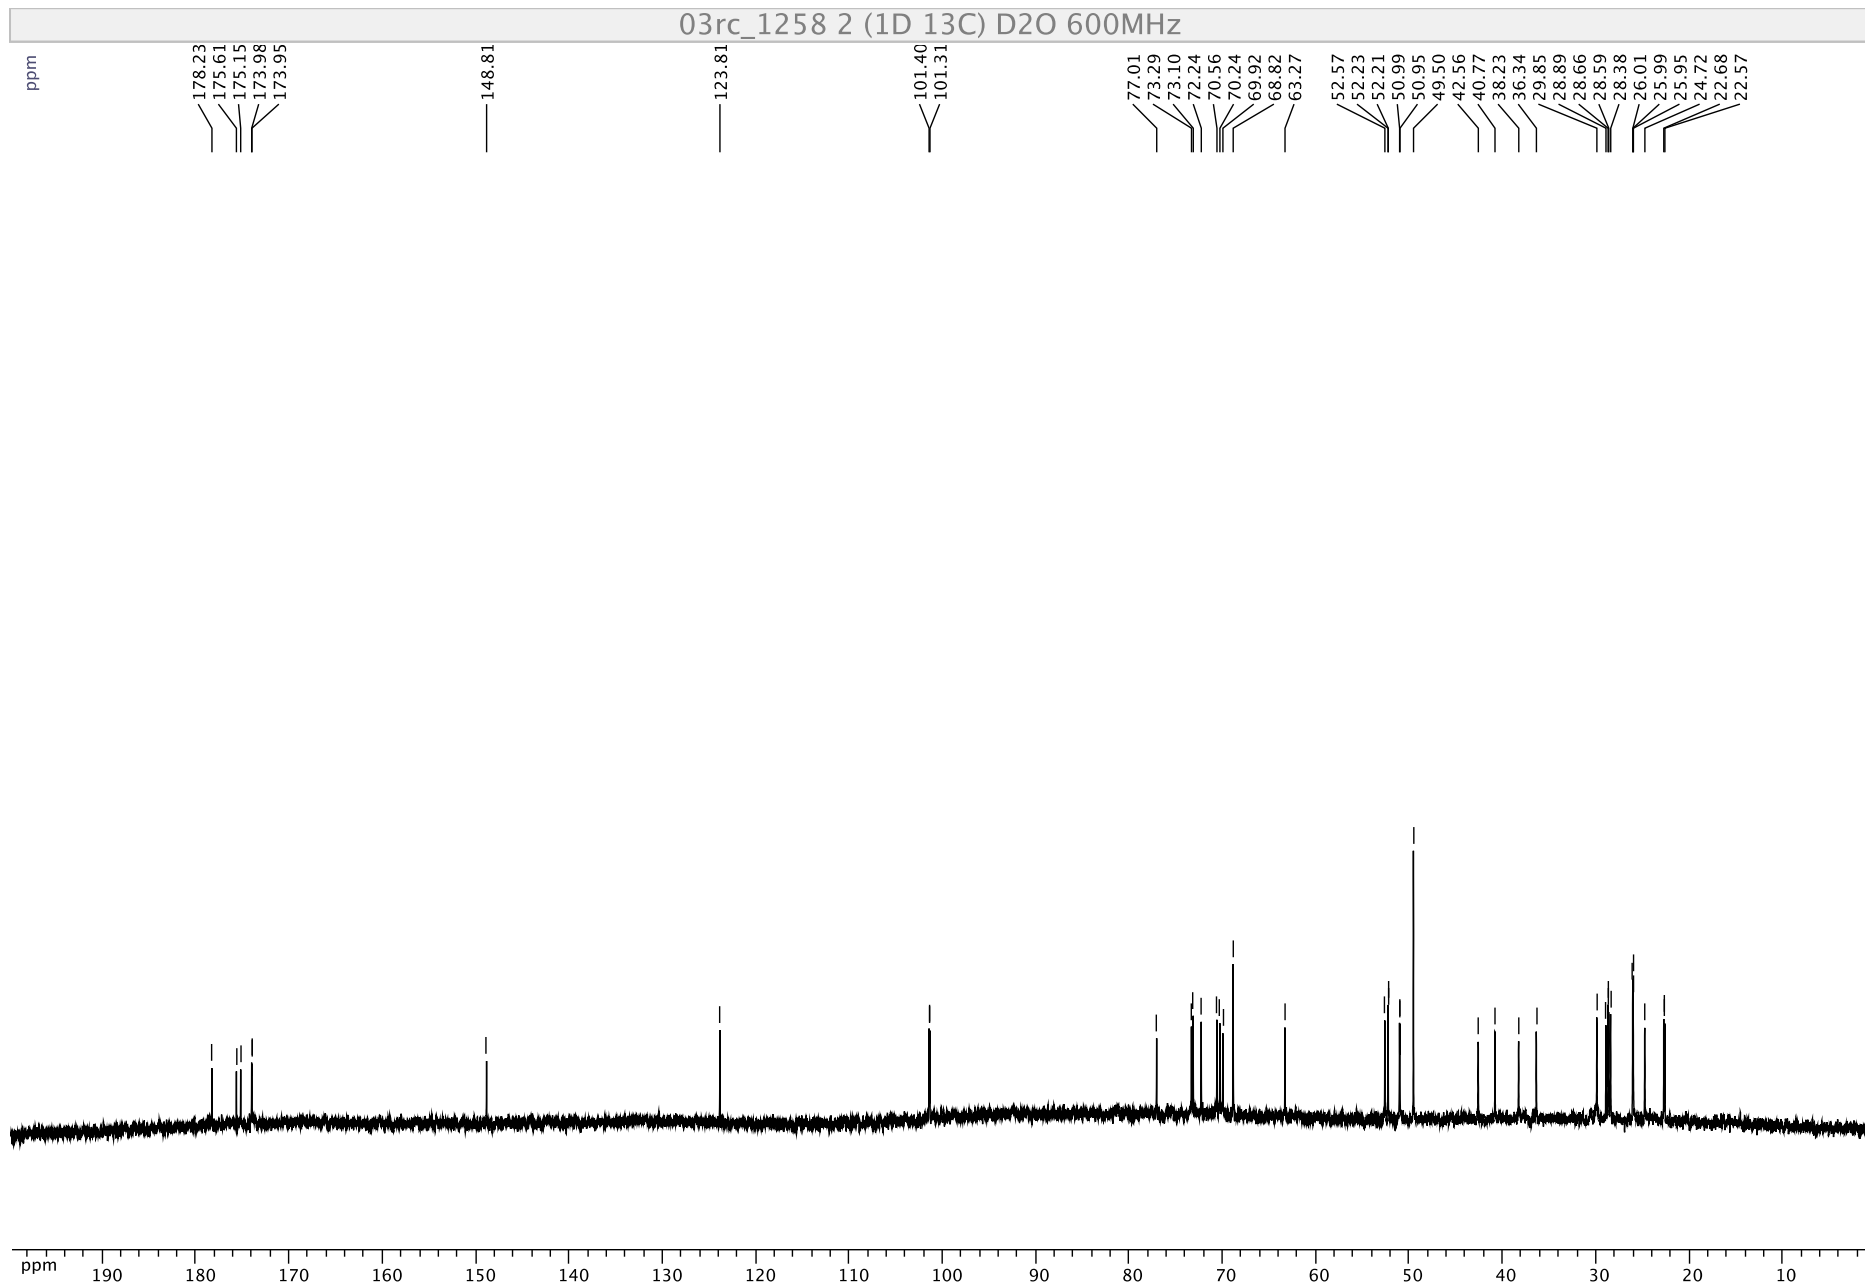

Compound 38

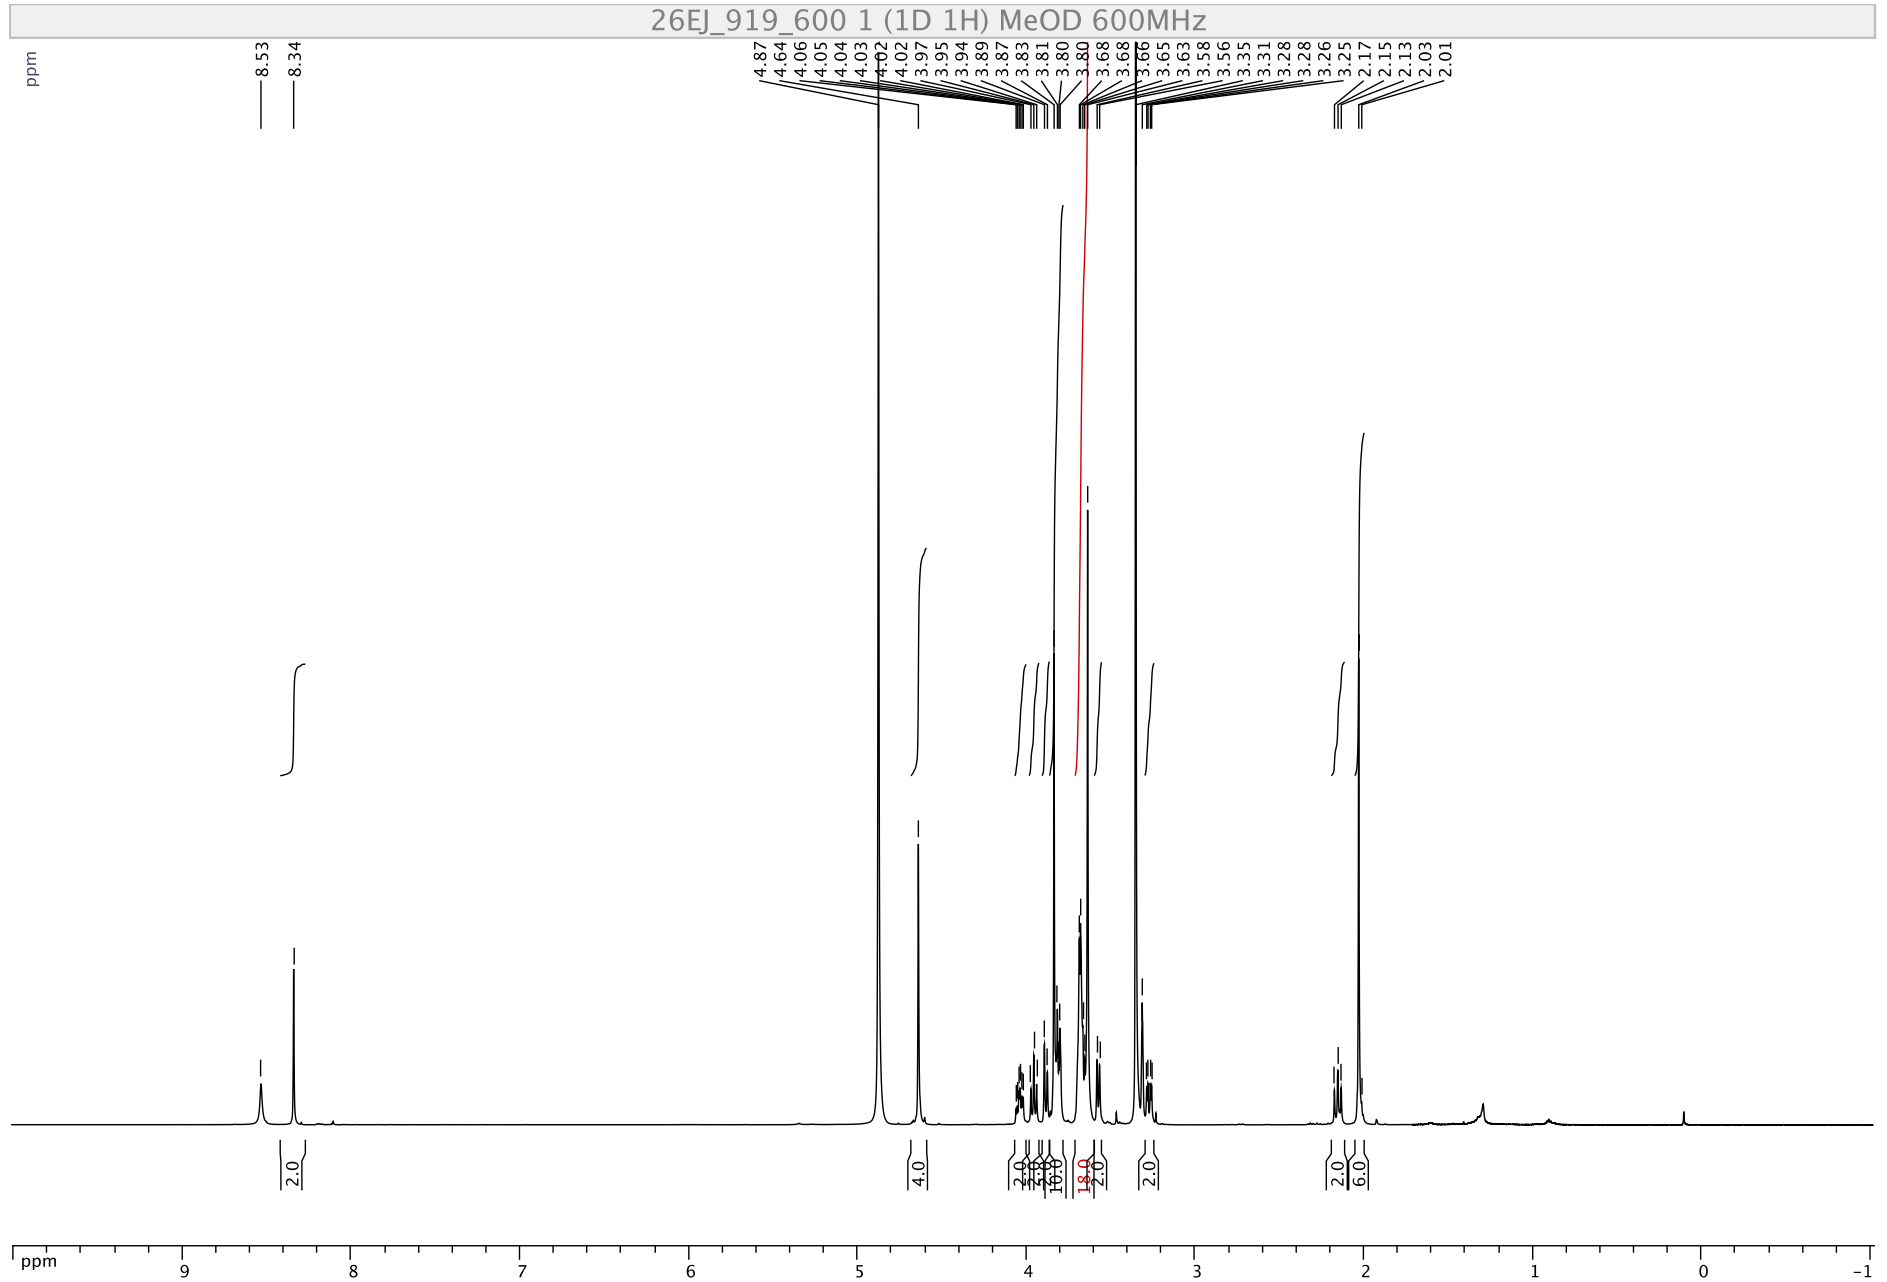

# Compound 38

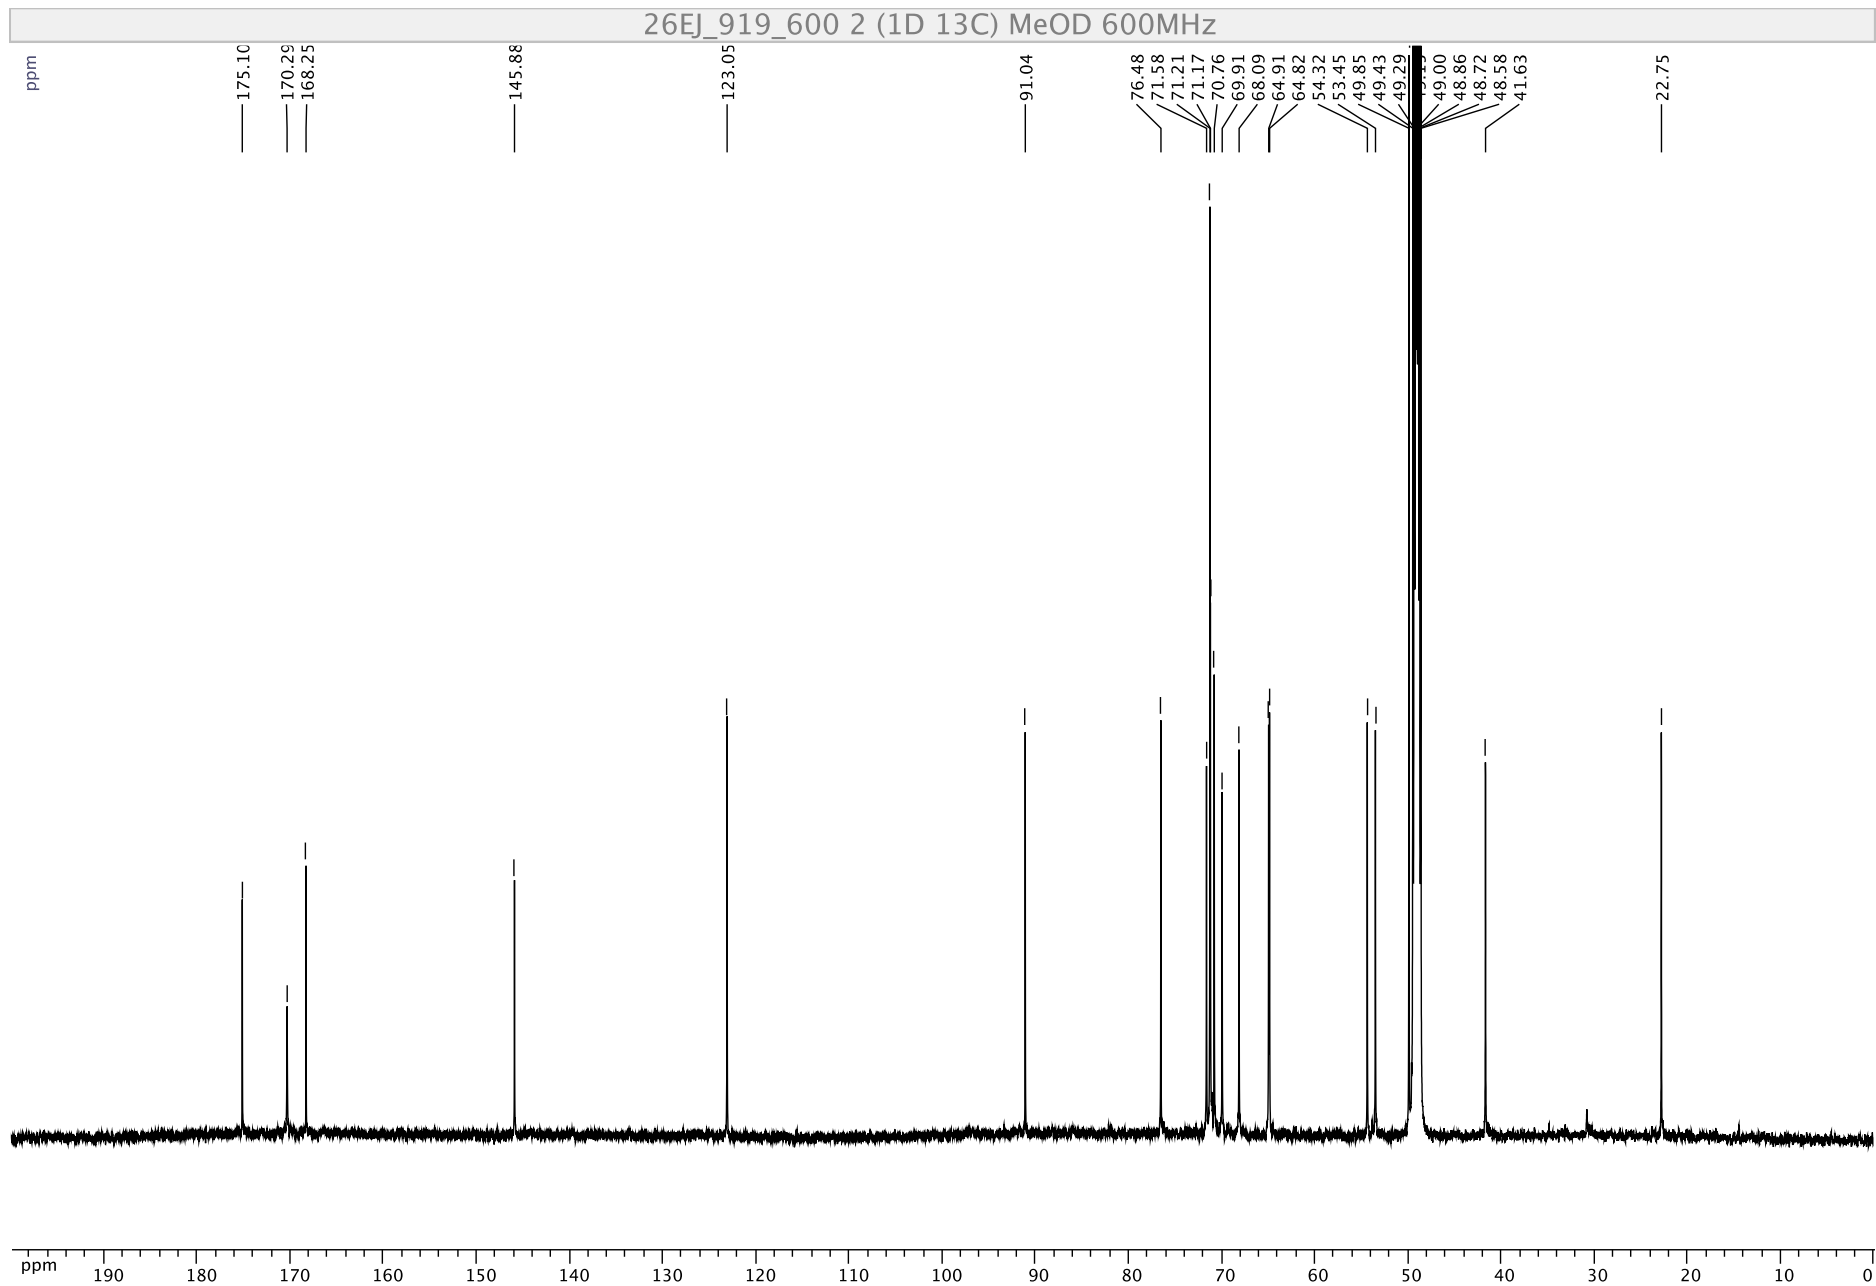

Compound 39

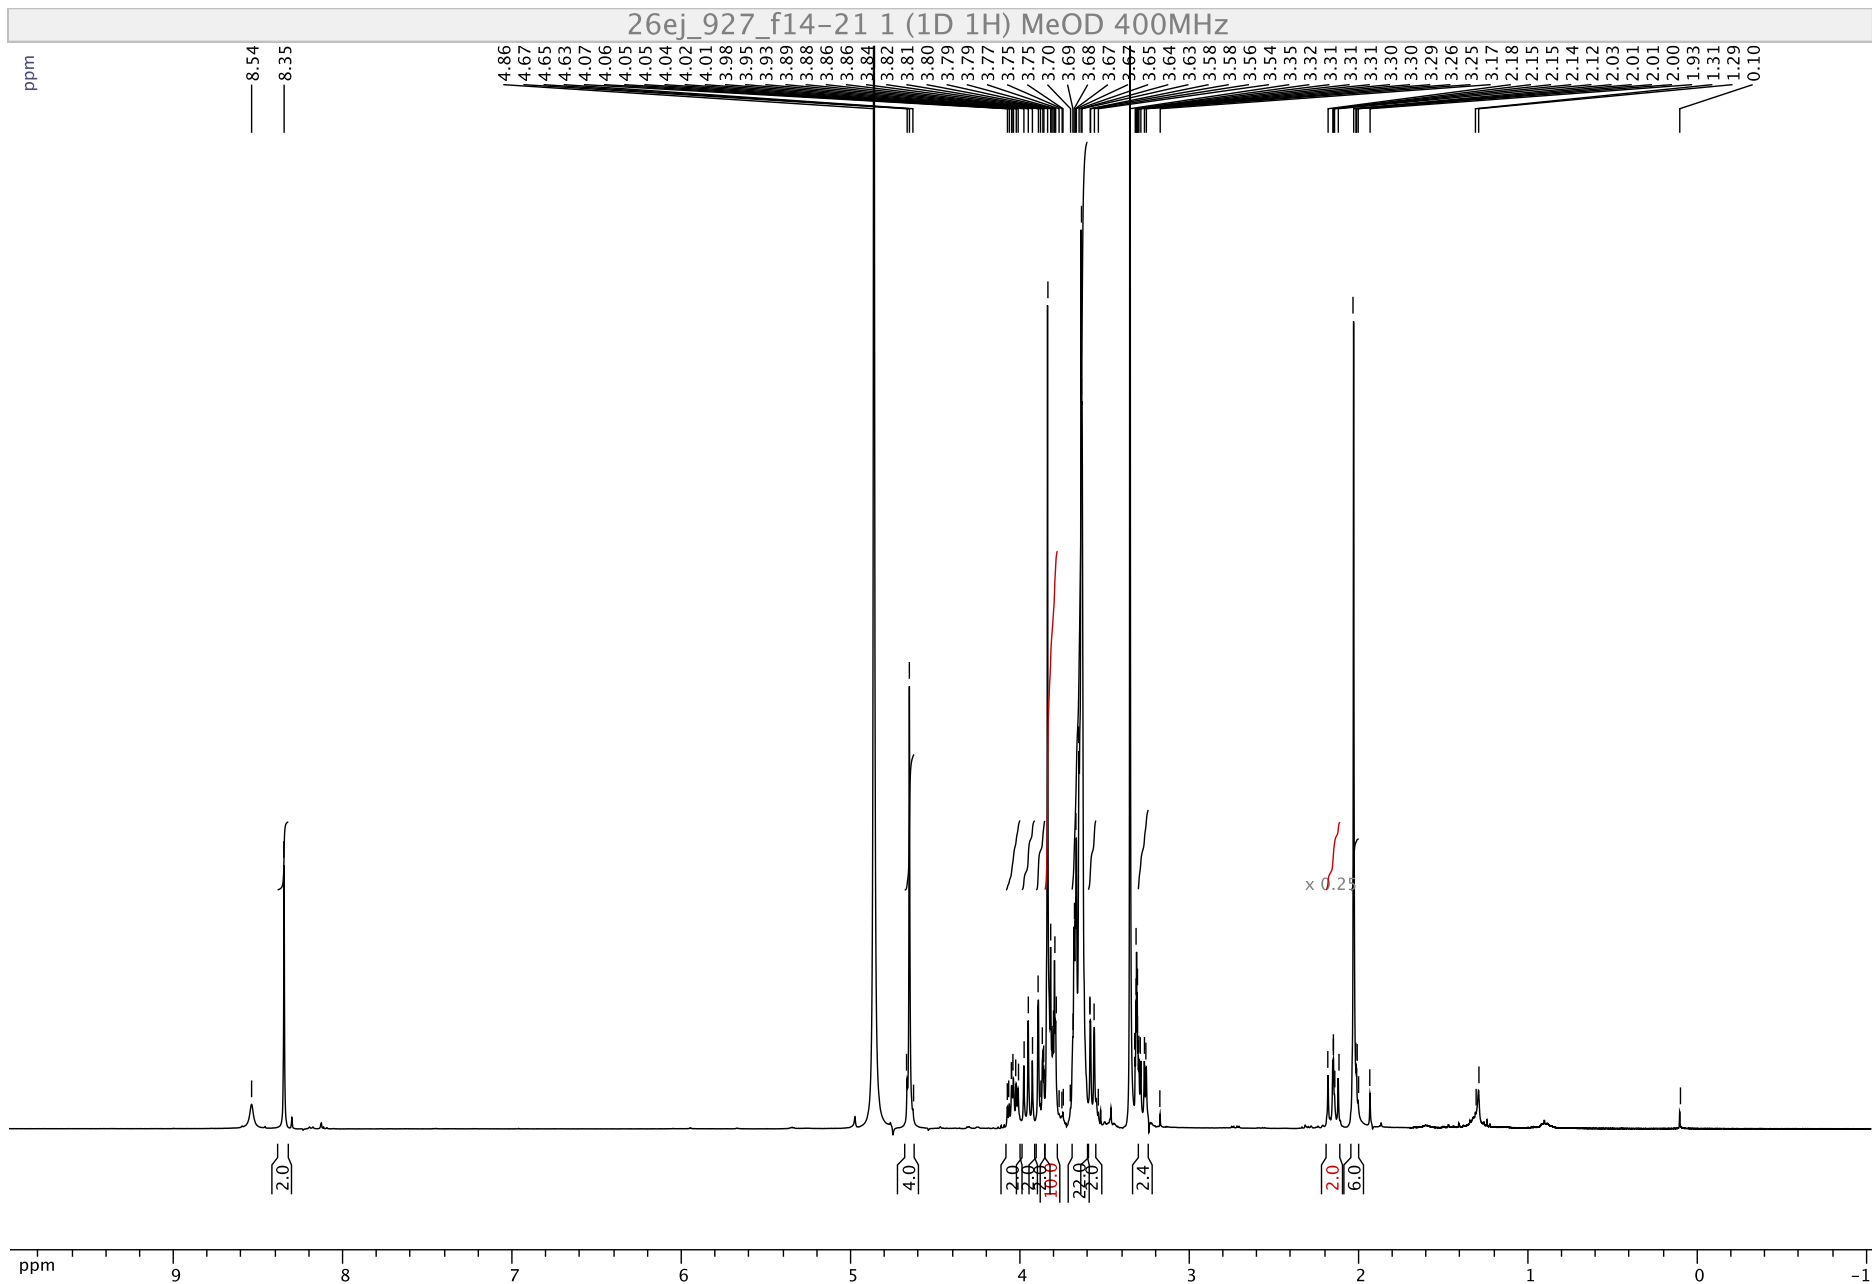

Compound 39

26ej\_927\_f14-21 2 (1D 13C) MeOD 400MHz

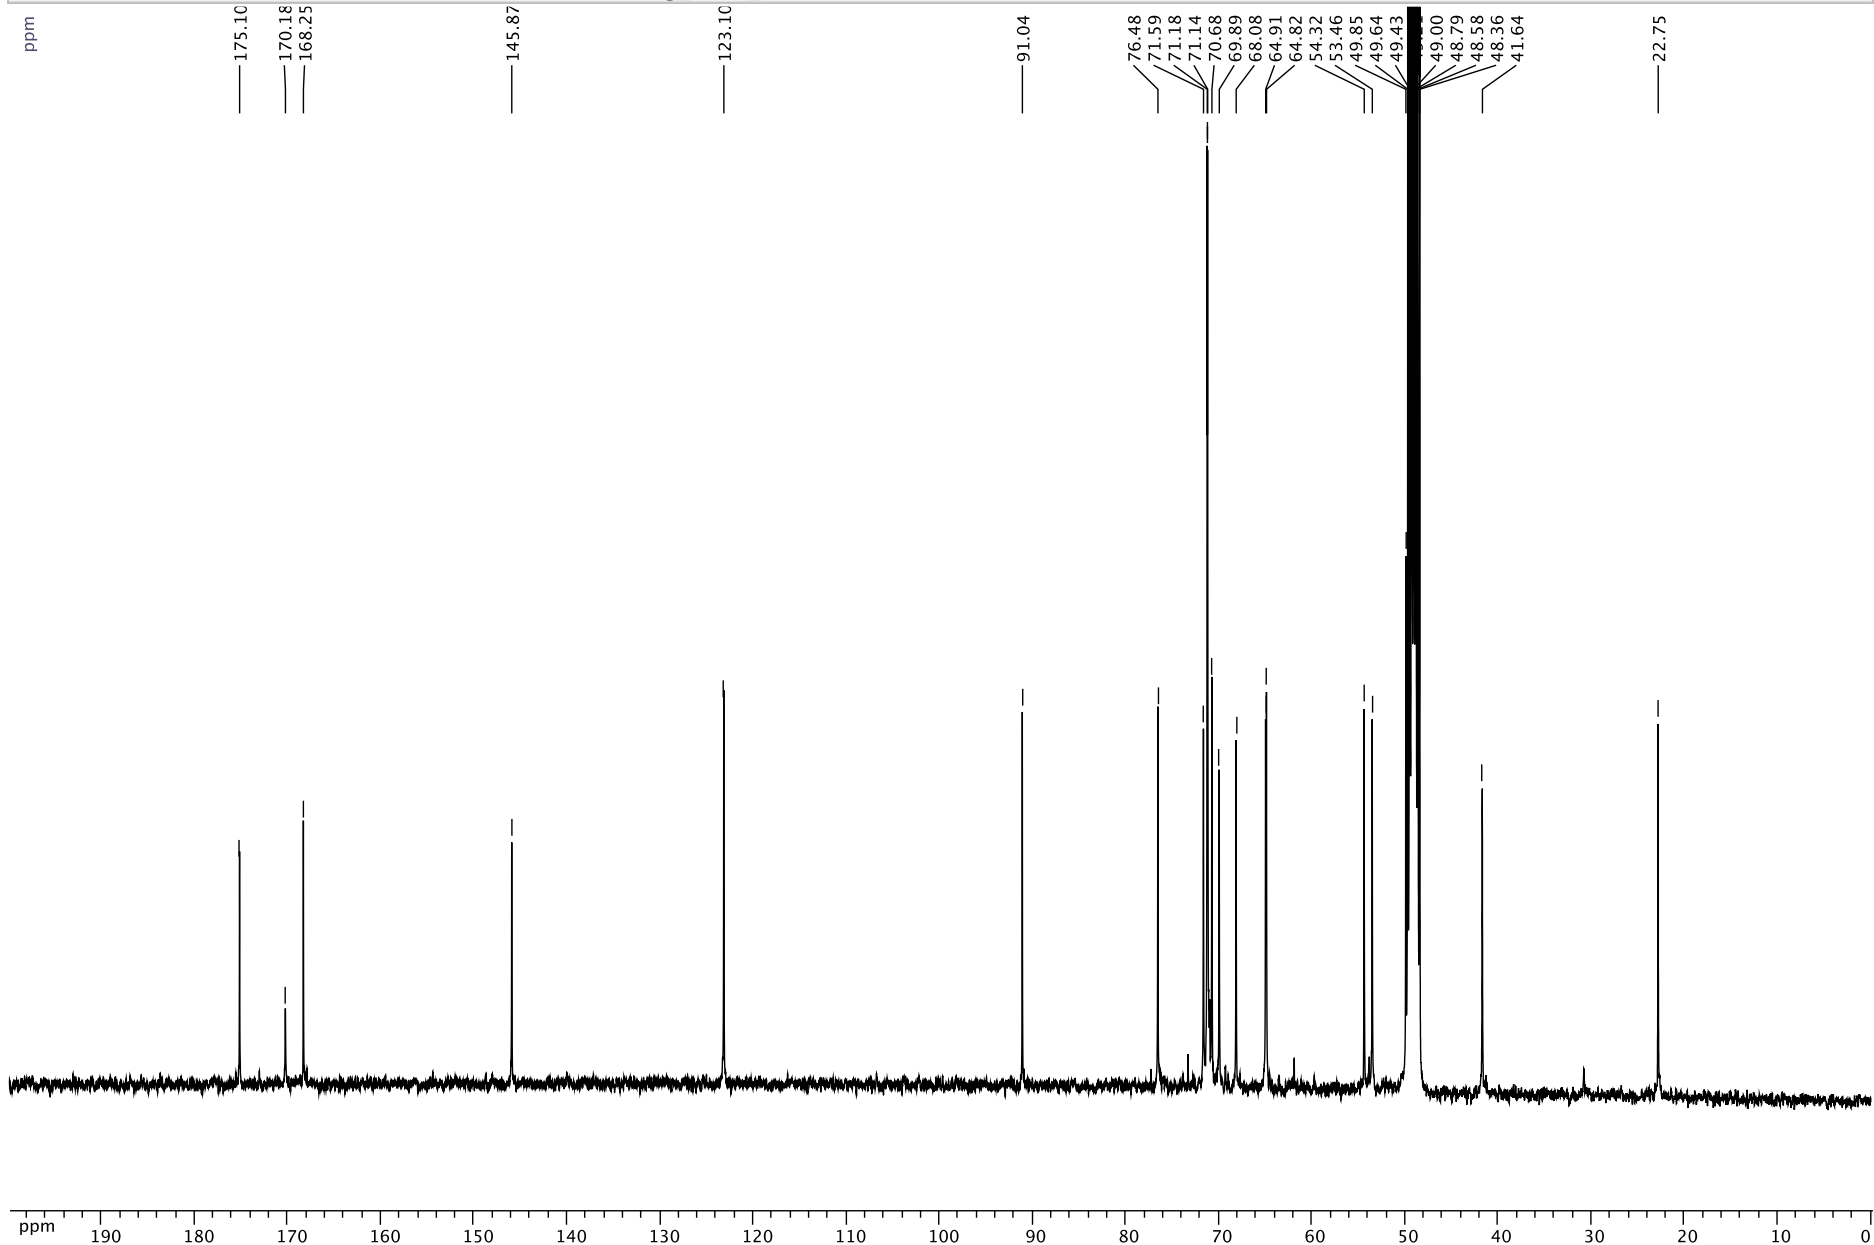

Compound 40 (ME1150)

03rc\_1256 (should be 03rc\_1259) 3 (1D 1H) D2O 600MHz

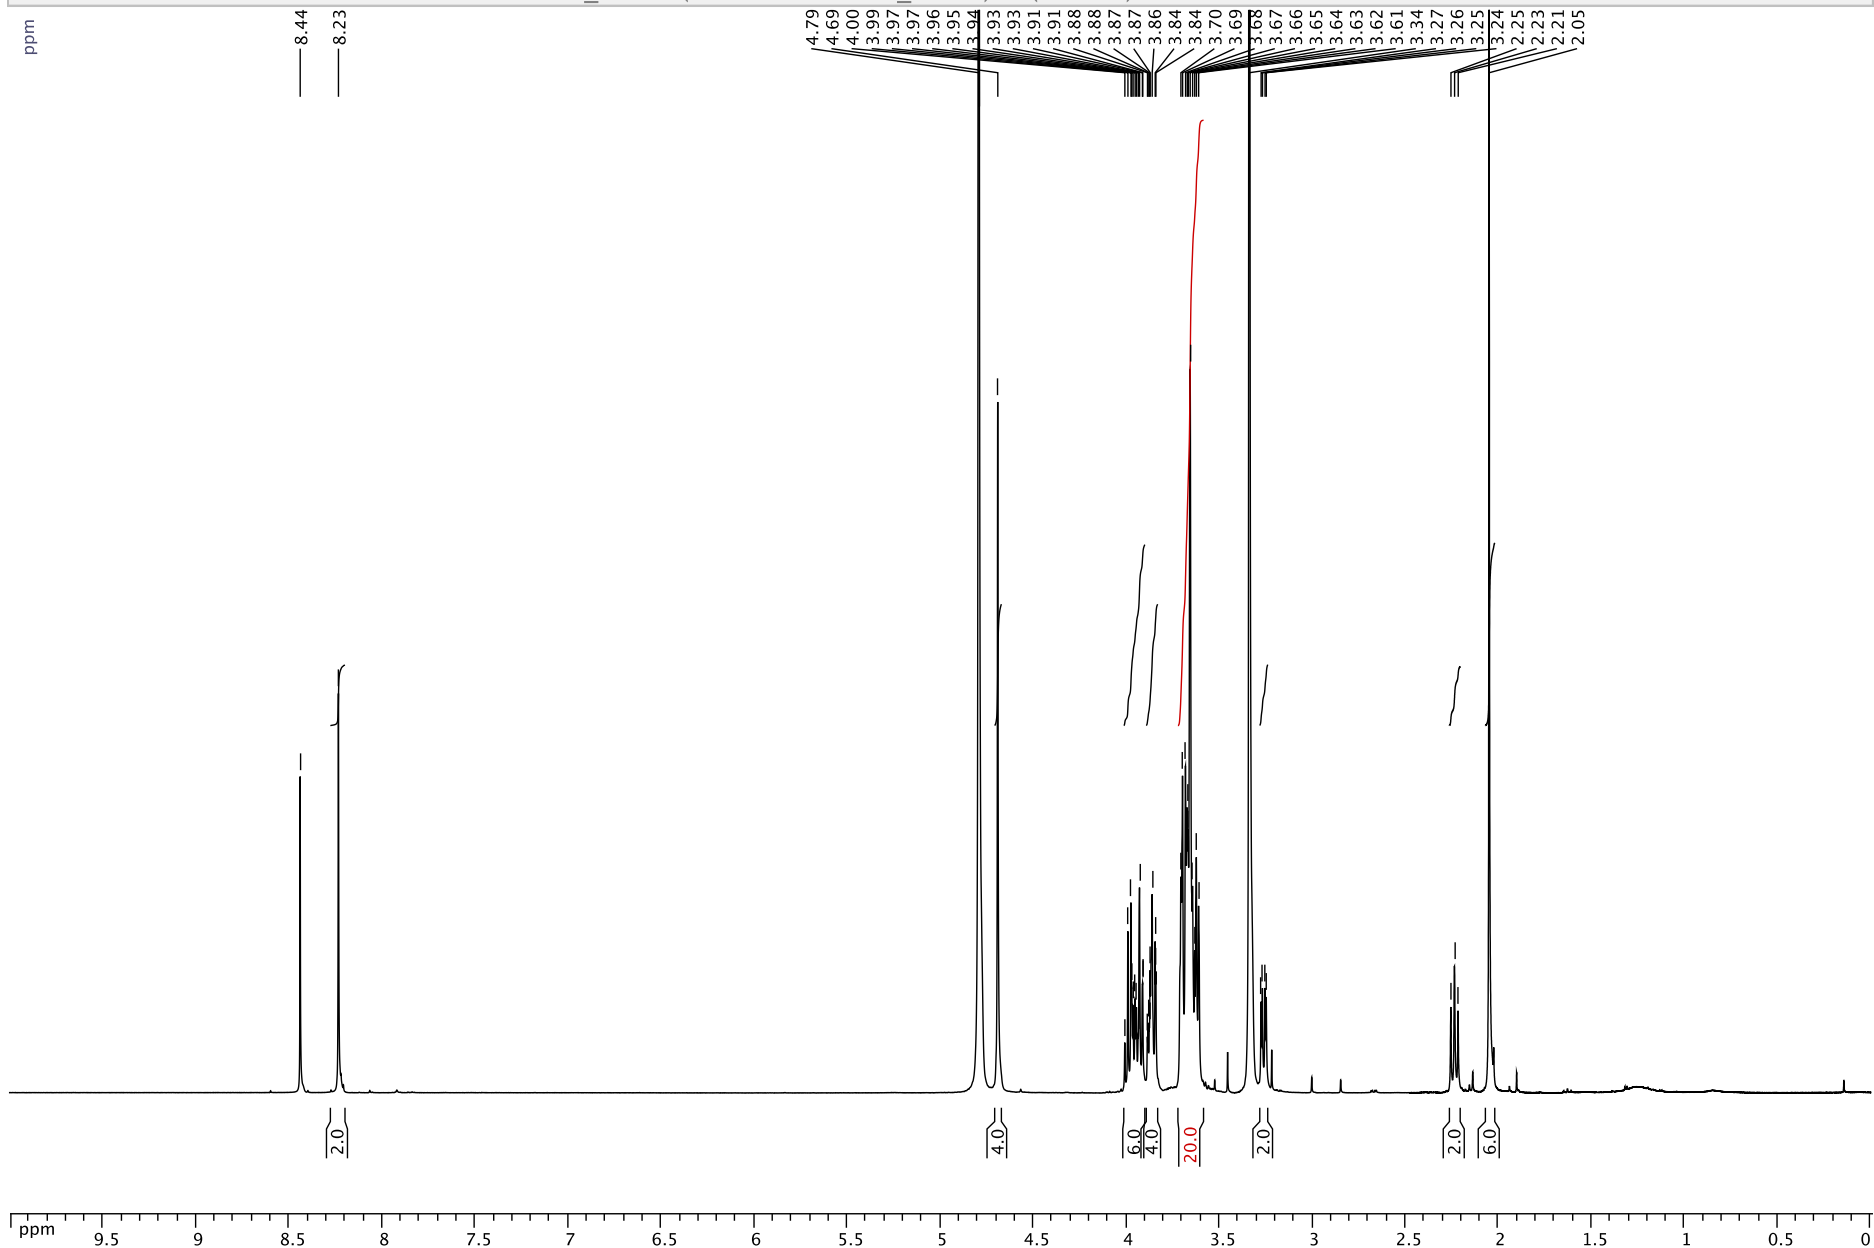

Compound 40 (ME1150)

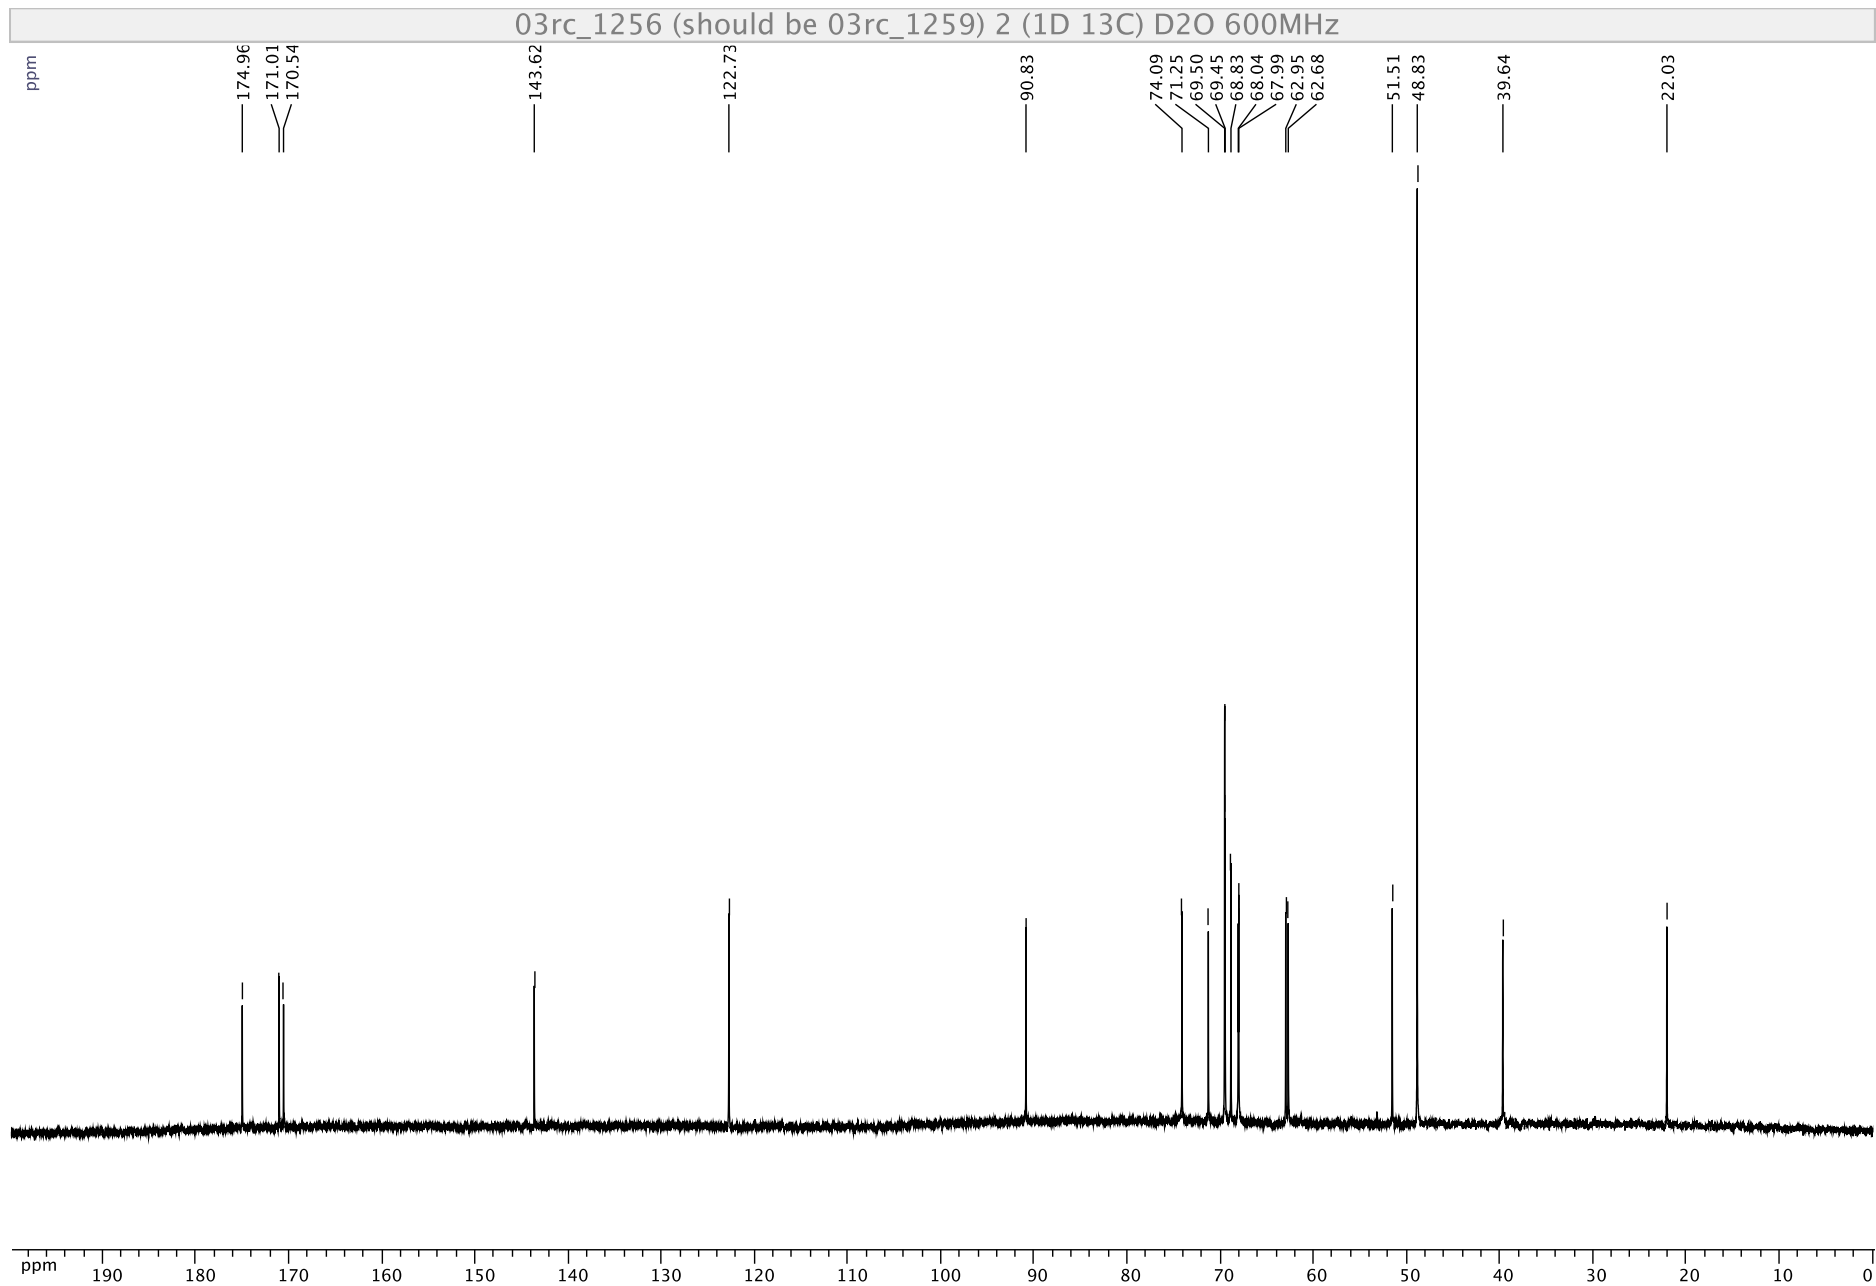

# Compound 41 (ME1151)

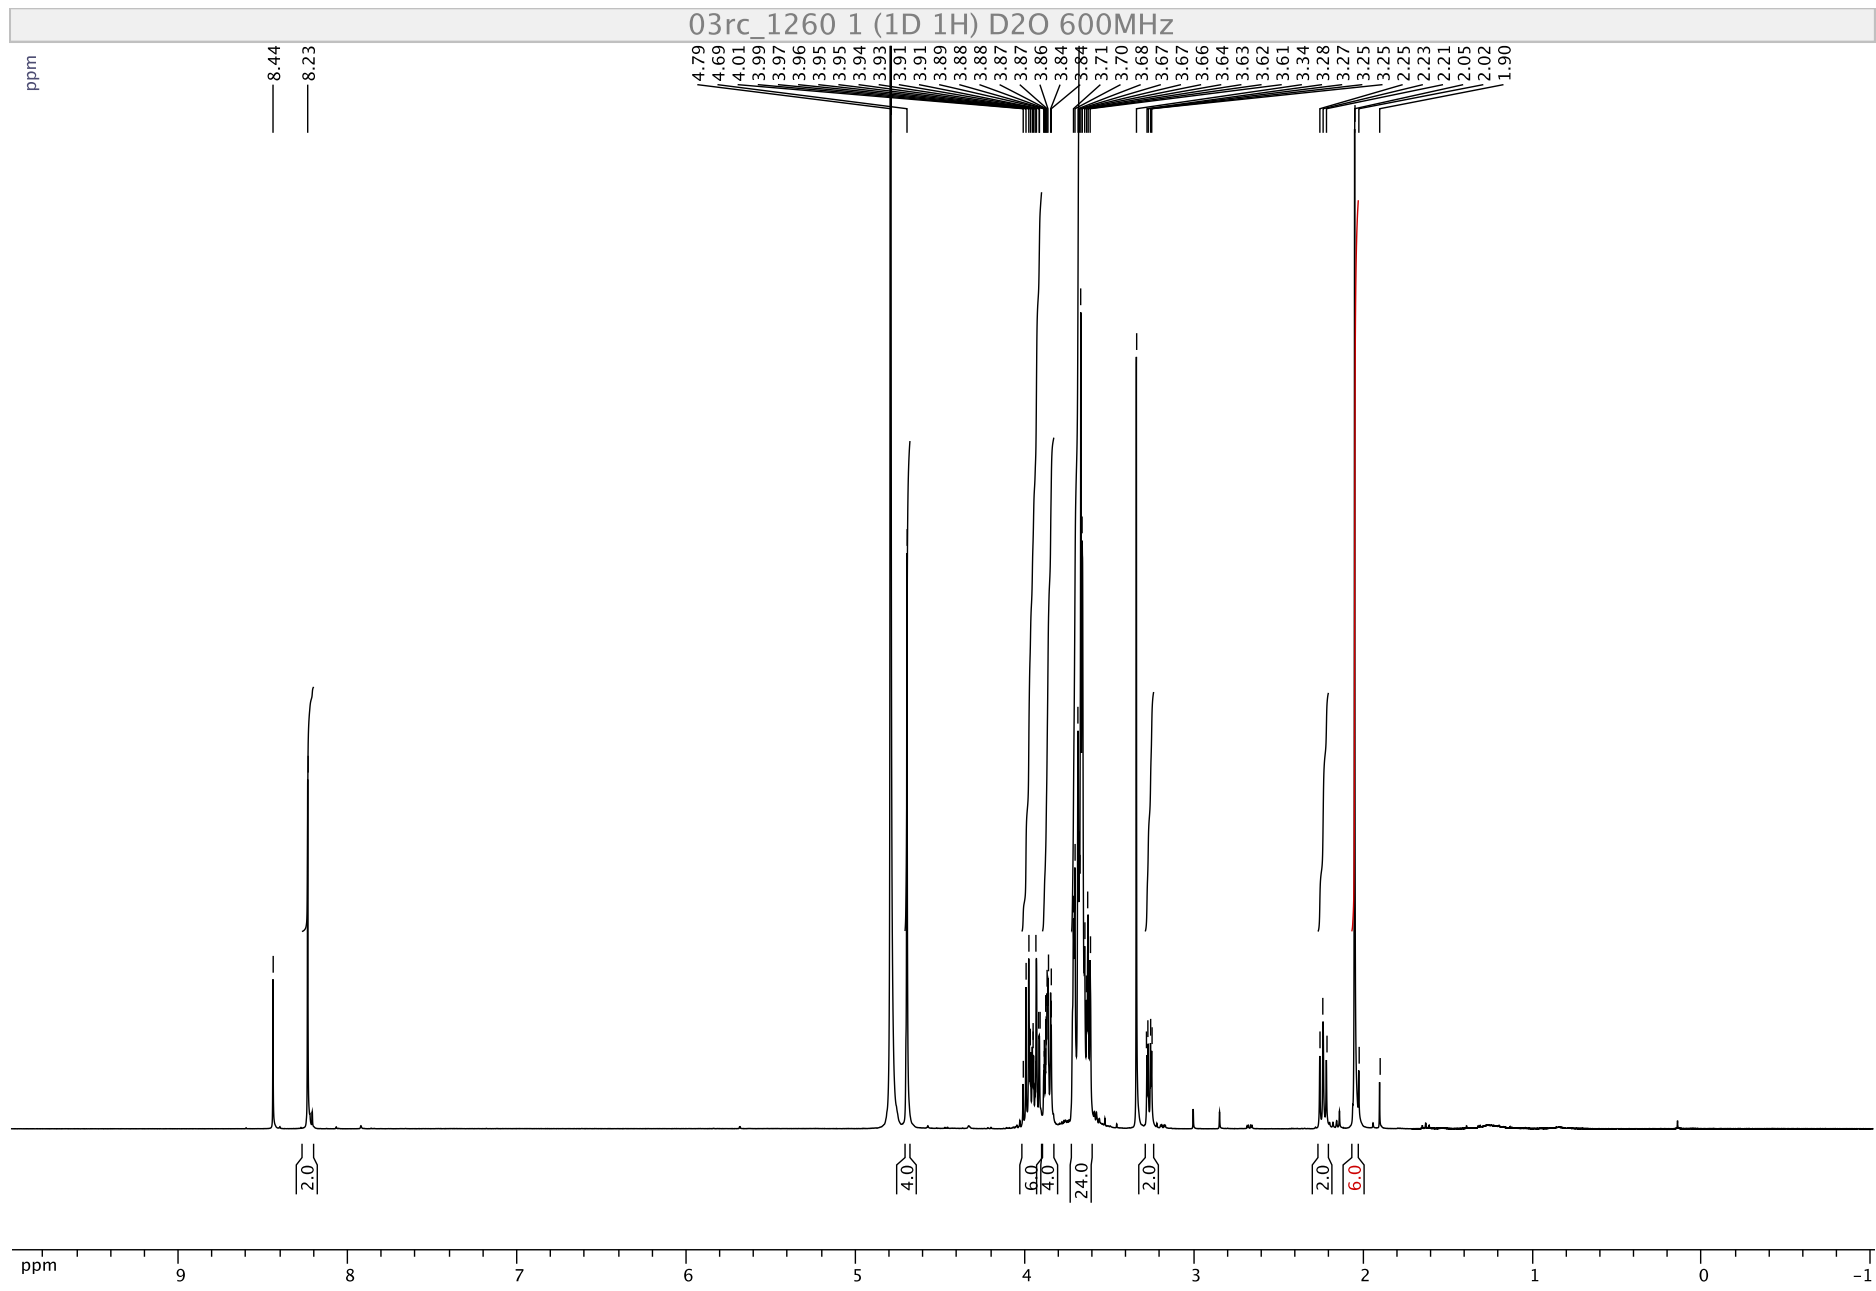



# Compound 41 (ME1151)

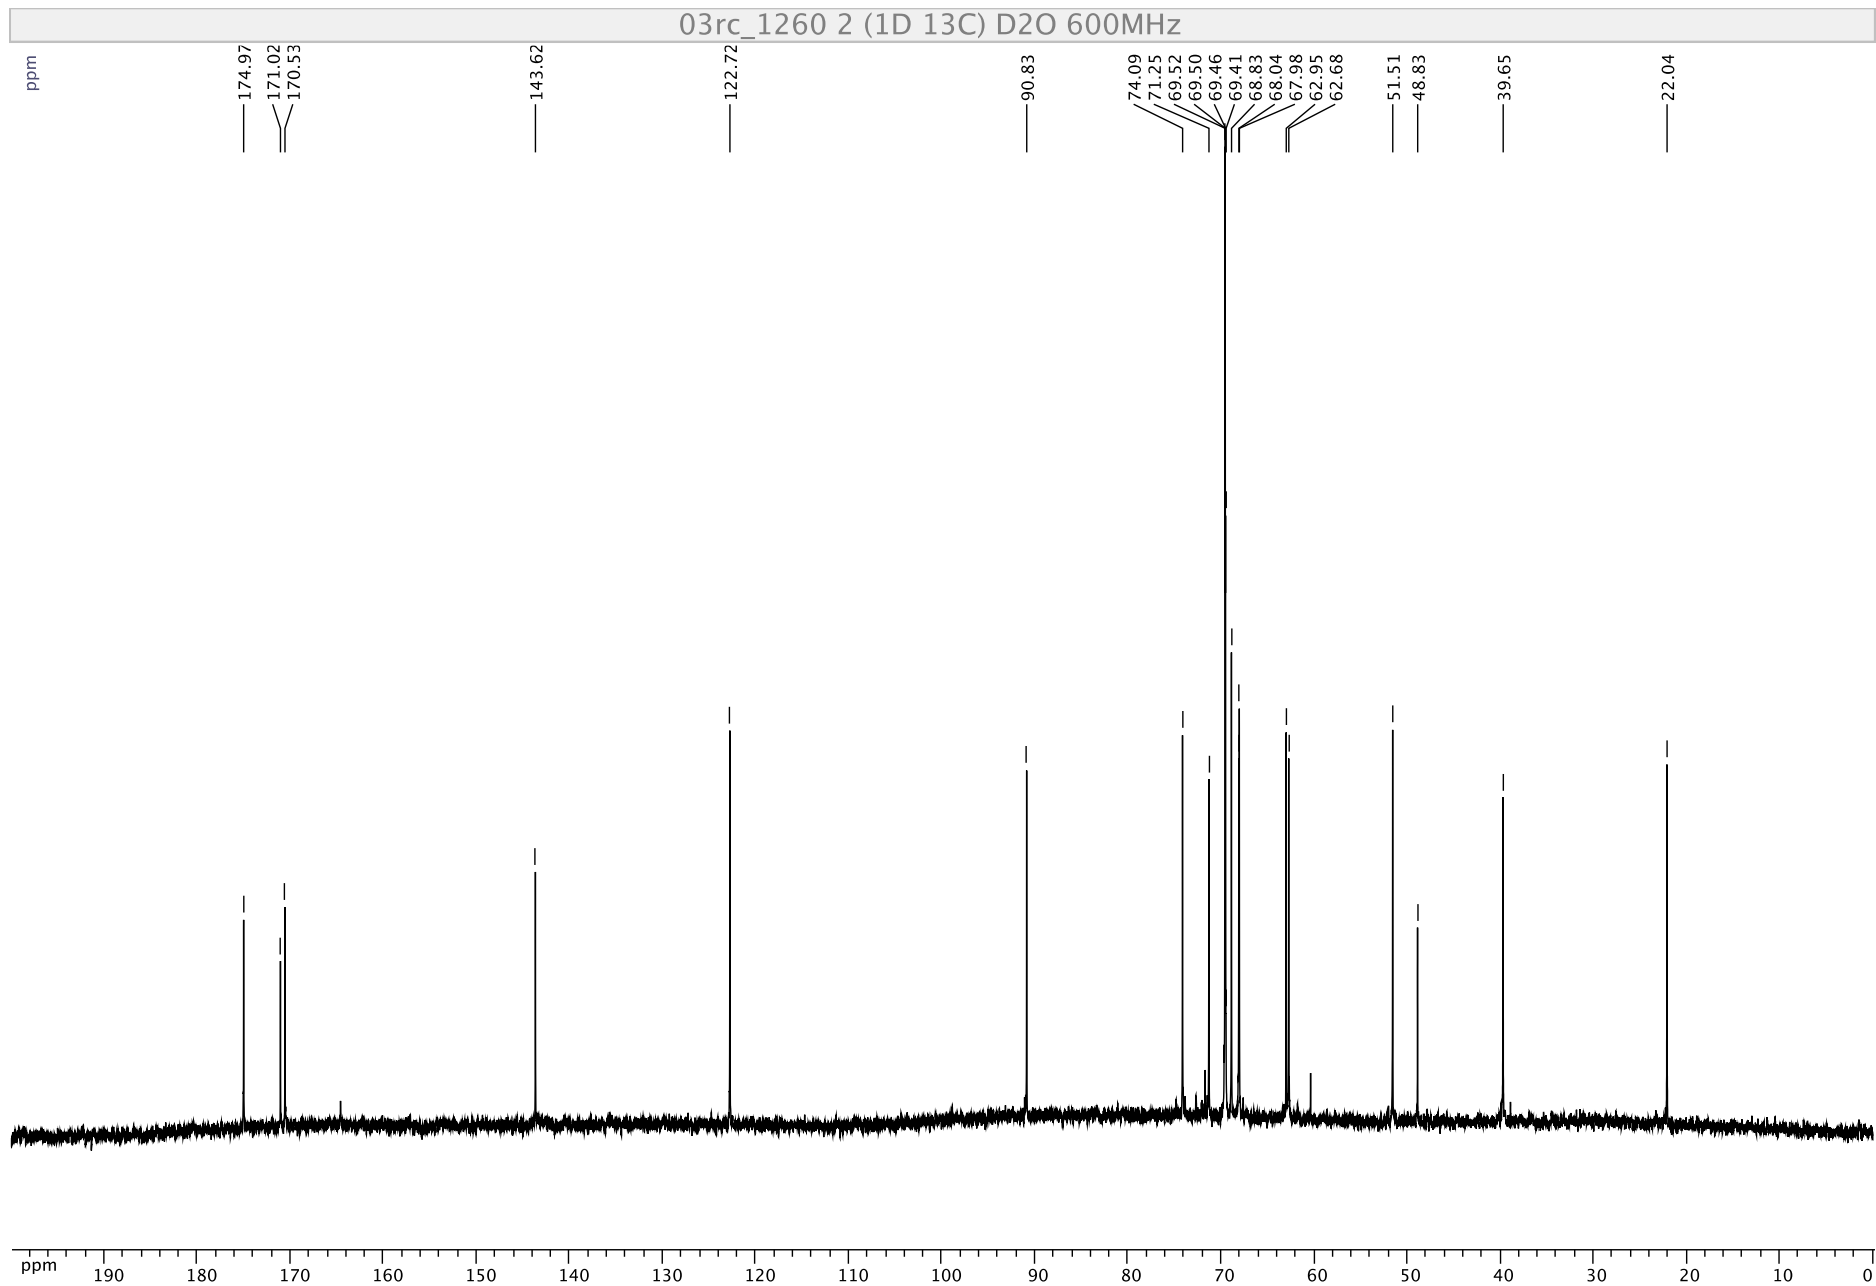

Supplement: d1ra08968d1.pdf [file d1ra08968d1.pdf]
